# Supplementary material for: Epigenetic analyses of planarian stem cells demonstrate conservation of bivalent histone modifications in animal stem cells
Source: PubMed Central journal article supplement — Genome Res. 2018 Oct;28(10):1543–54. doi: 10.1101/gr.239848.118 (PMC6169894; doi:10.1101/gr.239848.118), 2018-10
Supplement: supp_gr.239848.118_Supplemental_Figure_4.pdf [file supp_gr.239848.118_Supplemental_Figure_4.pdf]

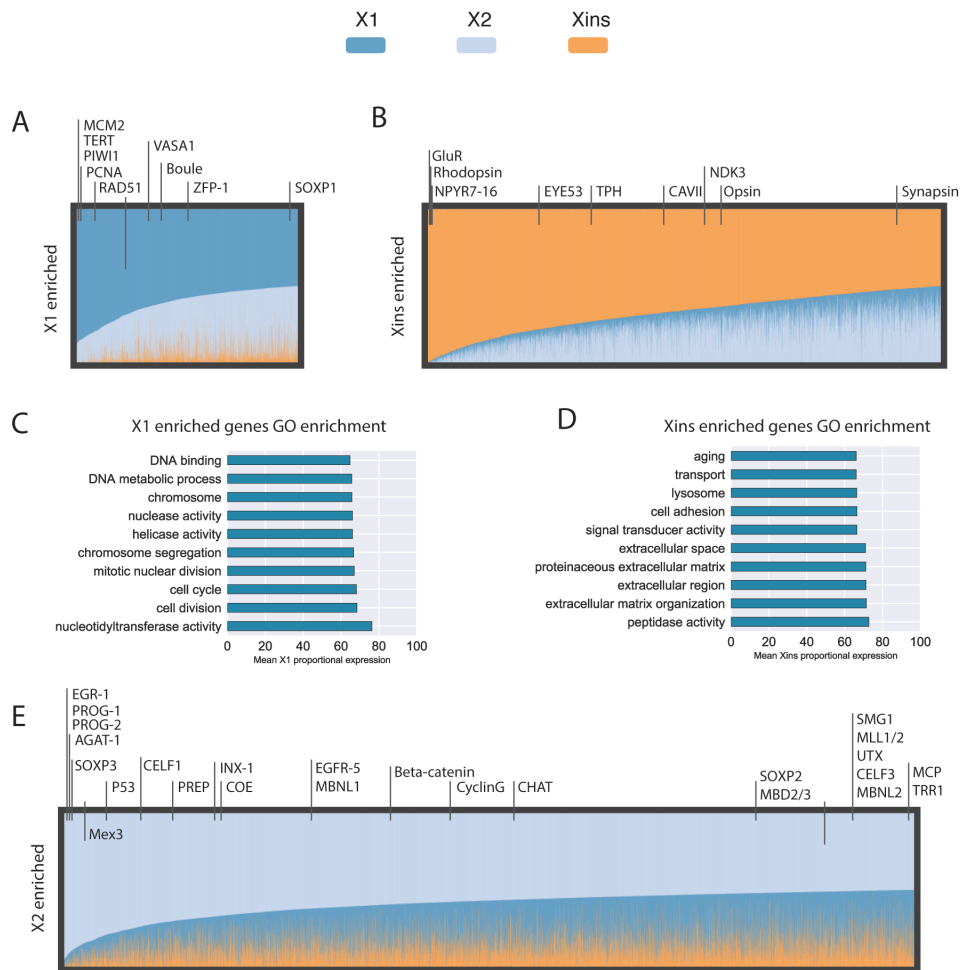

**Supplemental Figure 4:** Proportional expression values were used to plot the following: **A.** Spectrum of genes sorted by X1 enrichment ( $\Rightarrow$ 50% X1 expression). **B.** Spectrum of genes sorted by Xins enrichments enrichment ( $\Rightarrow$ 50% Xins expression). **C.** Gene Ontology (GO) analysis of X1 genes. Bar chart shows terms associated with stem cells and corresponding mean X1 percentage expression. **D.** GO terms associated with the Xins category, and corresponding mean Xins percentage expression. **E.** Spectrum of genes sorted by X2 enrichment ( $\Rightarrow$ 50% X2 enrichment).
