# Supplementary material for: Epigenetic analyses of planarian stem cells demonstrate conservation of bivalent histone modifications in animal stem cells
Source: PubMed Central journal article supplement — Genome Res. 2018 Oct;28(10):1543–54. doi: 10.1101/gr.239848.118 (PMC6169894; doi:10.1101/gr.239848.118), 2018-10
Supplement: supp_gr.239848.118_Supplemental_Figure_9.pdf [file supp_gr.239848.118_Supplemental_Figure_9.pdf]

**Supplementary Figure 9:** Single-cell RNA-seq profiles of highly enriched X2 genes marked by bivalent H3K4me3 and H3K27me3 histones. We predicted the cell lineage involvement of X2 genes plotted in Figure 5 using single cell Drop-seq data from Fincher et al. (2018) and generated a pseudotime lineage tree using the database from Plass, Solana et al. (2018). For all genes we observe an enrichment in post-mitotic populations, and low expression in the *smcdwi-1+* X1 compartment. For *egr-1* and *SoxP-3* we note an enrichment also in *smcdwi-1+* stem cells, but the expression within cells taken as a whole increases in the post-mitotic compartment consistent with our FACS proportional analysis.

From <http://digiworm.wi.mit.edu>

Overall clusters generated in dataset

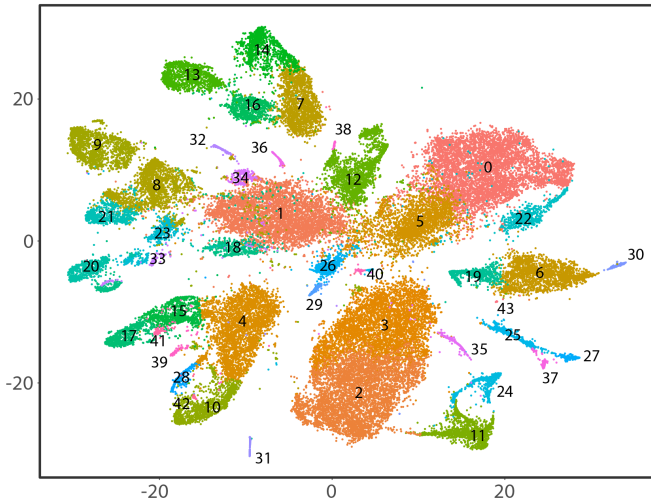

Stem cell (*Smedwi-1*) sub-clustering

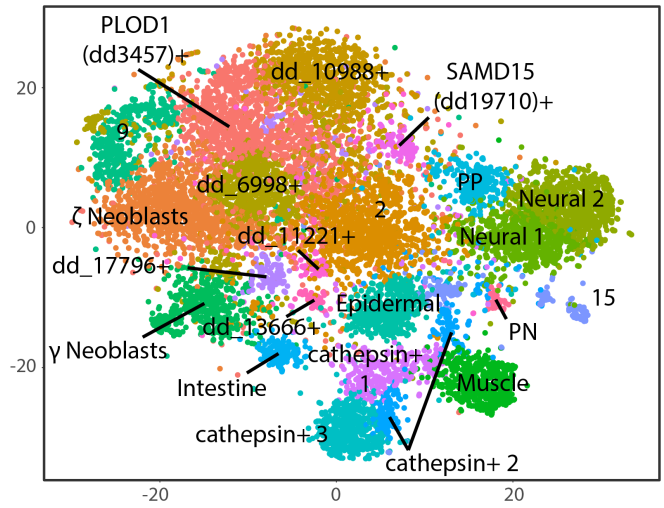

From <https://shiny.mdc-berlin.de/psca/>

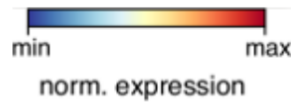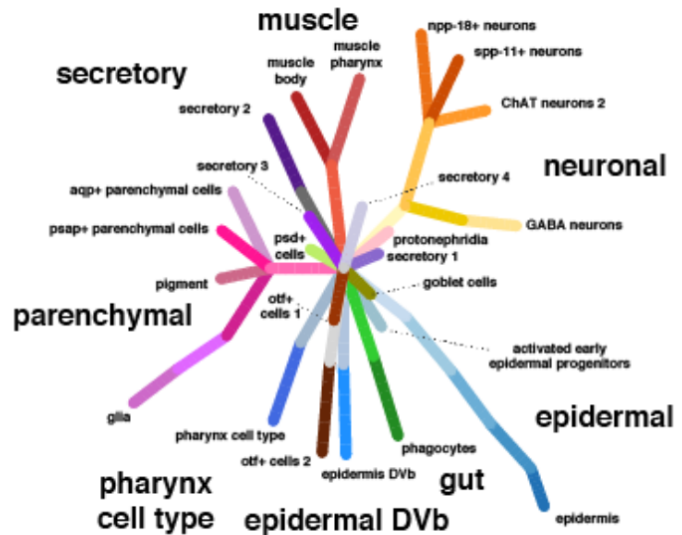

**phox 2a:**

enrichment in neural, non-ciliated neurons and parenchymal

no significant enrichment in smedwi-1 neoblasts; but a few 'neural' NBs have expression

Overall expression:

Stem Cell expression:

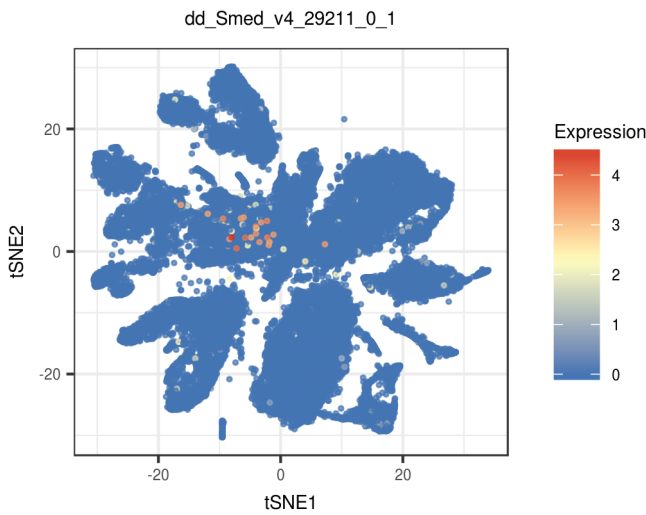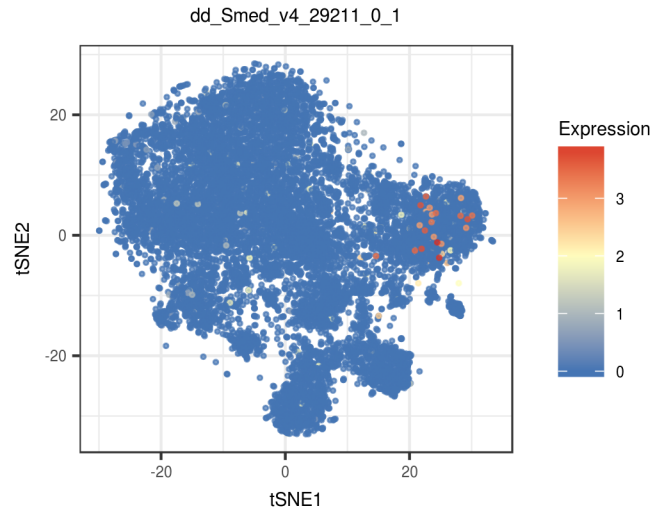

Contig is enriched in the following clusters

Based on main clustering analysis:

-----  
Parenchymal: 38

Based on sub-clustering:

-----  
Neural: 35

Non-ciliated neurons: 12, 25

Parenchymal: 7

**Pseudotime Analysis for neuronal lineage:**

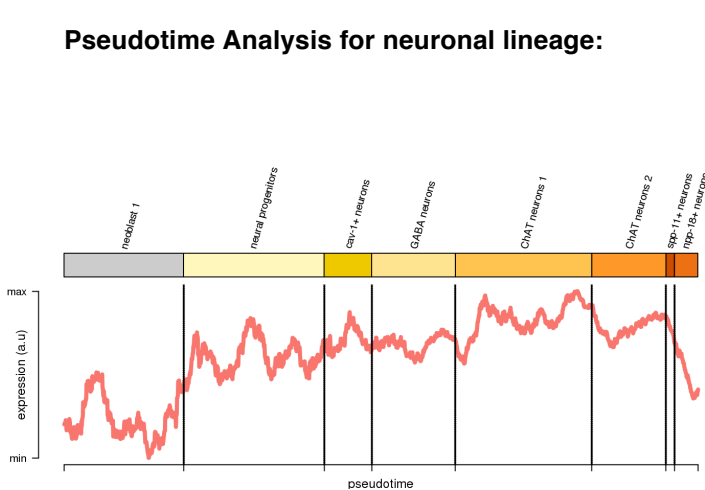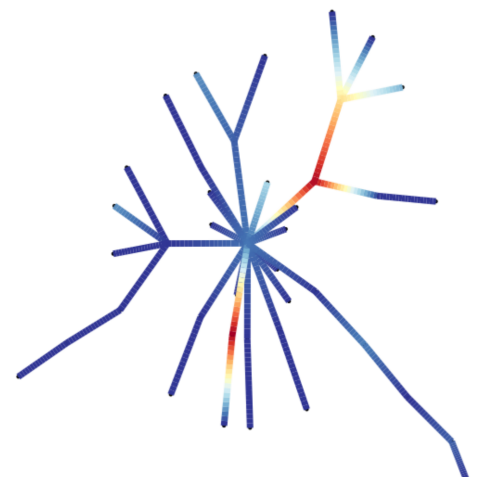

**reticulocalbin-1**

**enrichment epidermis**

**no significant enrichment in smedwi-1 neoblasts; but a few 'epidermal' NBs have expression**

Overall expression:

Stem Cell expression:

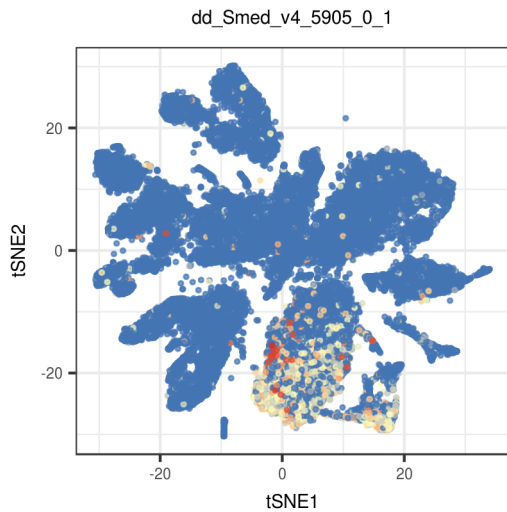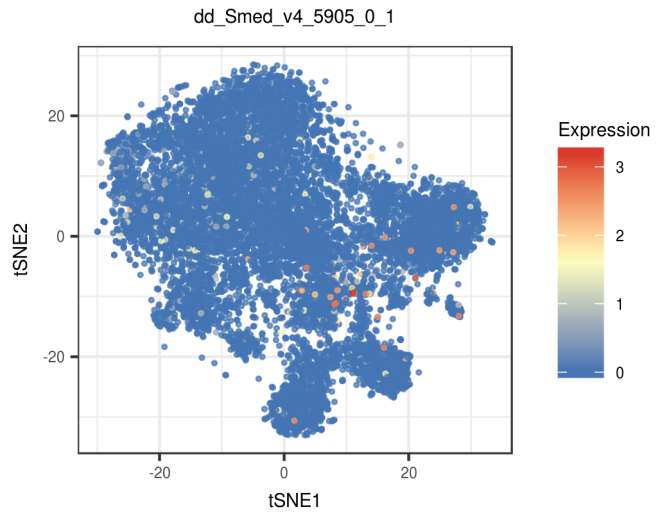

Contig is enriched in the following clusters

Based on main clustering analysis:

-----  
Epidermal: 2, 3, 11, 35

Based on sub-clustering:

-----  
Epidermal: 1

Pharynx: 0

**Pseudotime Analysis for epidermal lineage:**

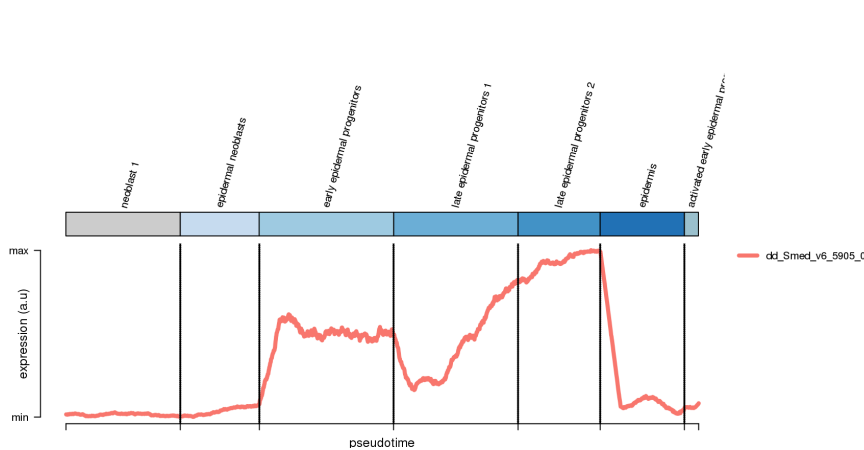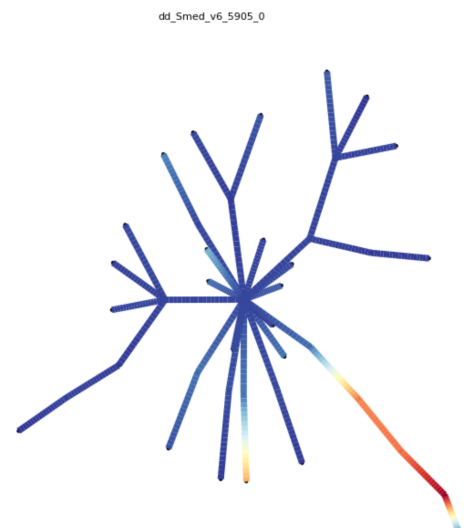



## **soxP-3**

enrichment in epidermis

statistical enrichment in neoblasts, but expressed in epidermal and zeta class

Overall expression:

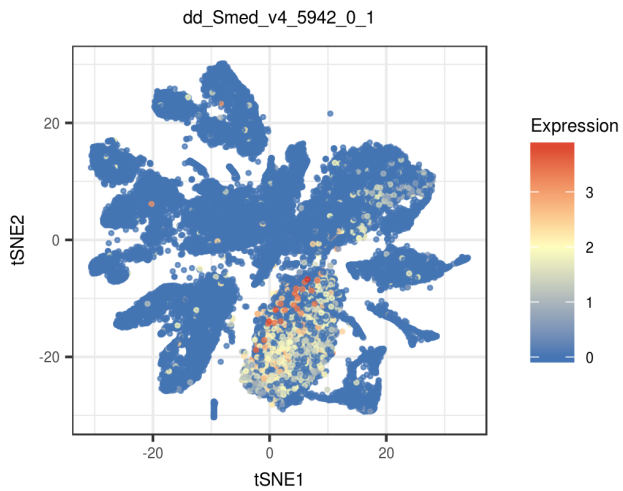

Stem Cell expression:

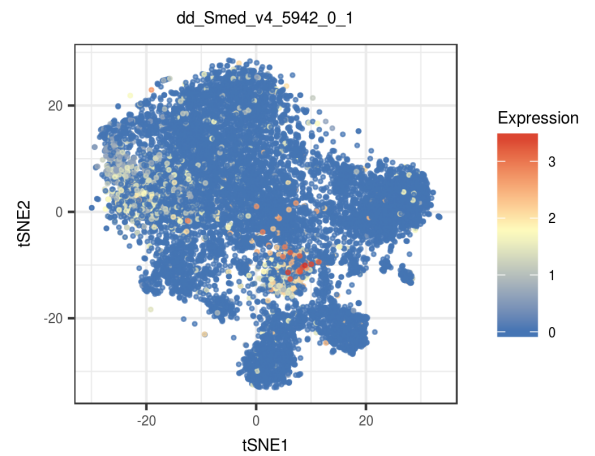

Contig is enriched in the following clusters

Based on main clustering analysis:

-----  
Epidermal: 2, 3

Based on subclustering:

-----  
Epidermal: 0, 1

Smedwi+1 cells: 1, 10

## **Pseudotime Analysis for epidermal lineage**

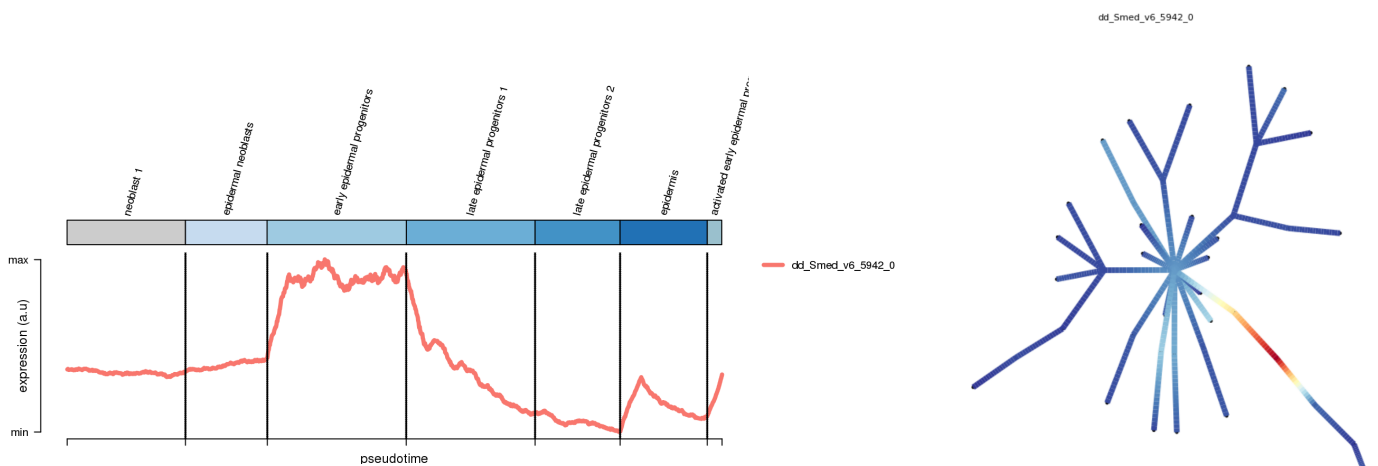

## *egr-1*

enrichment in epidermis

statistical enrichment in neoblasts, but expressed in epidermal and zeta class

Overall expression:

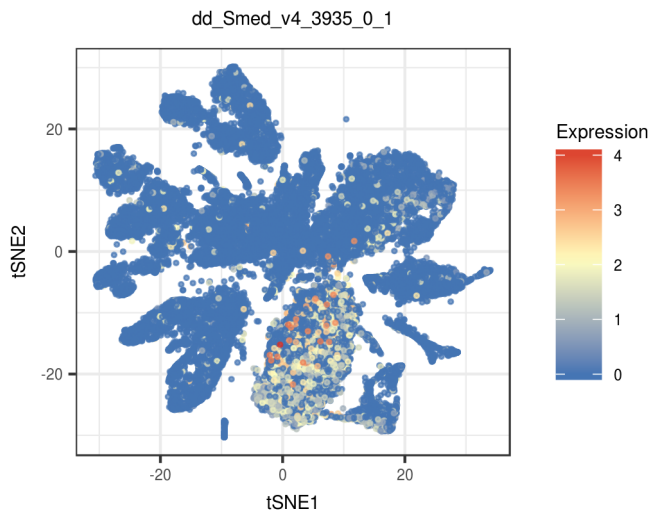

Stem Cell expression:

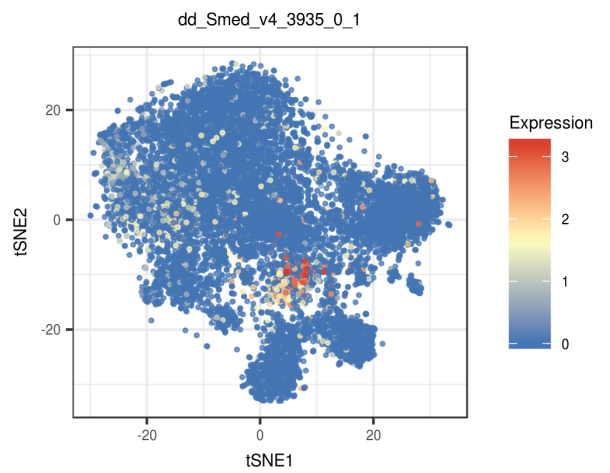

Contig is enriched in the following clusters

Based on main clustering analysis:

-----  
Epidermal: 2, 3

Based on sub-clustering:

-----  
Epidermal: 2

Smedwi+1 cells: 10

## Pseudotime Analysis for epidermal lineage

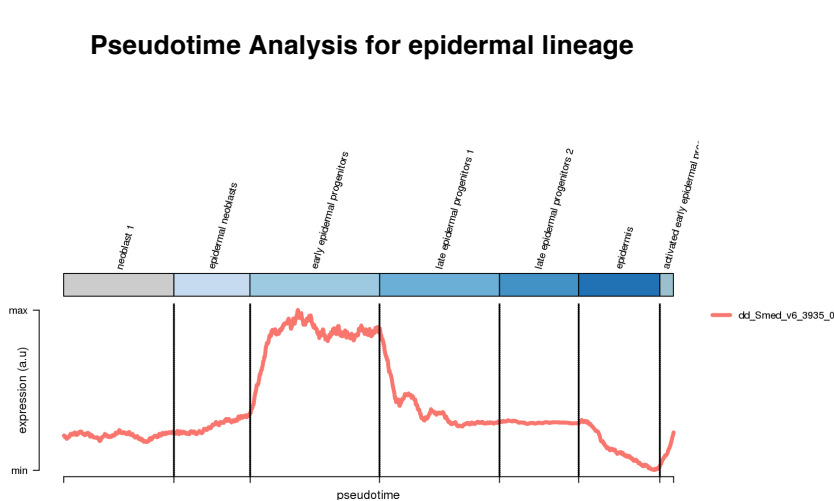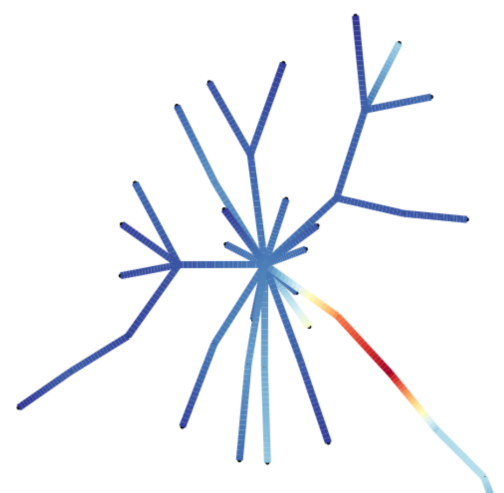

## *nkx1.2*

*enrichment in neuron and non-ciliated neurons*

*some expression in neuronal subset of X1 neoblasts but no enrichment*

Overall expression:

Stem Cell expression:

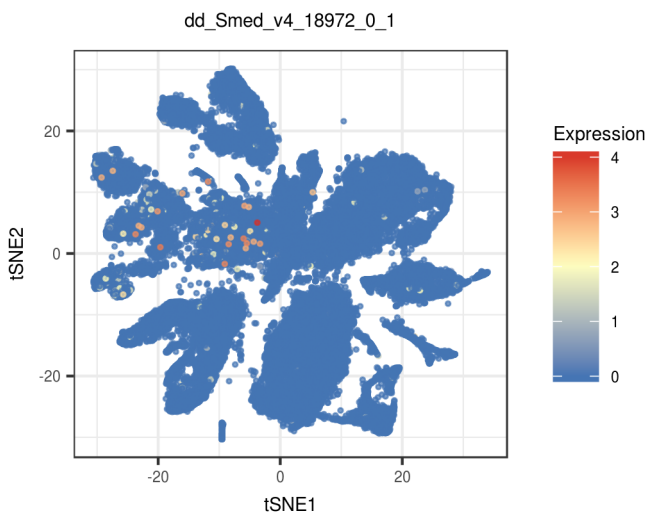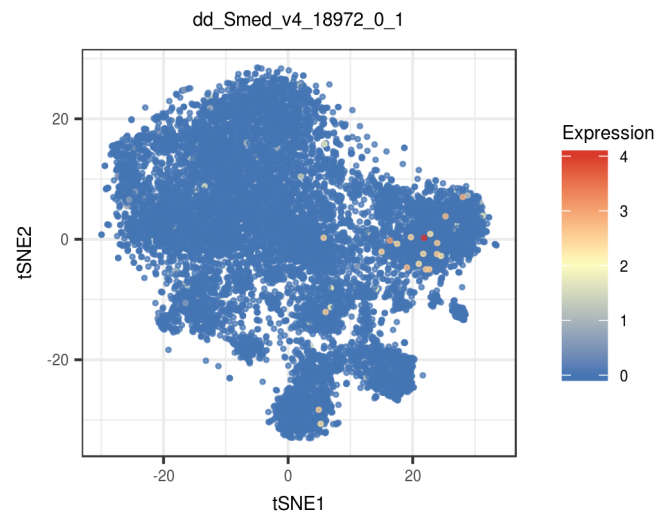

Contig is enriched in the following clusters

Based on main clustering analysis:

-----

Based on subclustering:

-----

Neural: 46

Non-ciliated neurons: 14

## Pseudotime Analysis for neuronal lineage

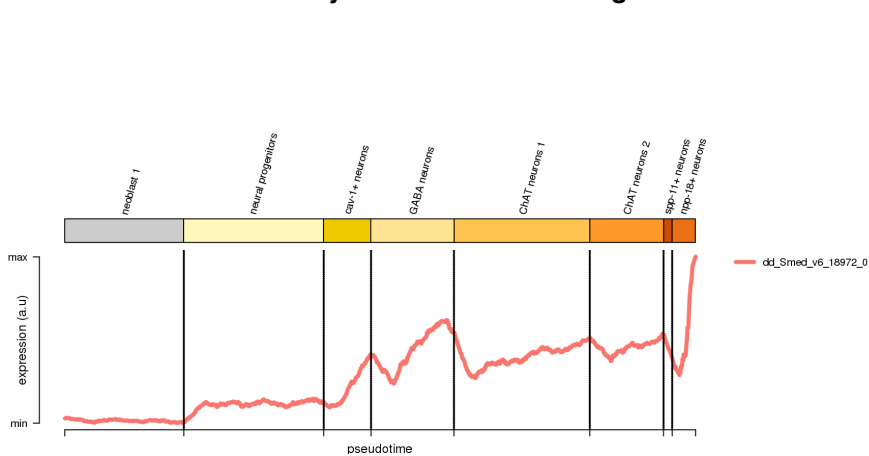

dd\_Smed\_v6\_18972\_0

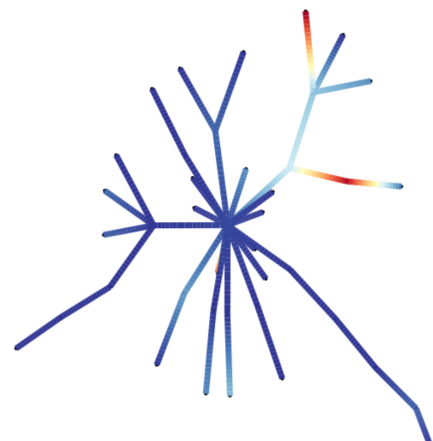

**hoxb9 (post2a)**

enrichment in epidermis

some expression in epidermal subset of X1 neoblasts but no enrichment

Overall expression:

Stem Cell expression:

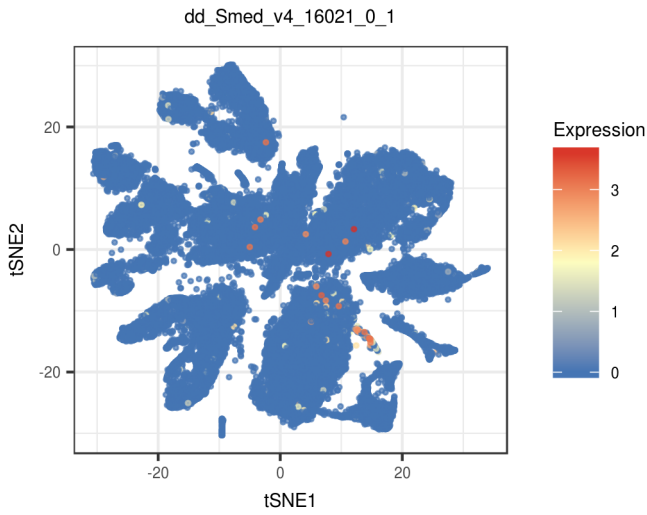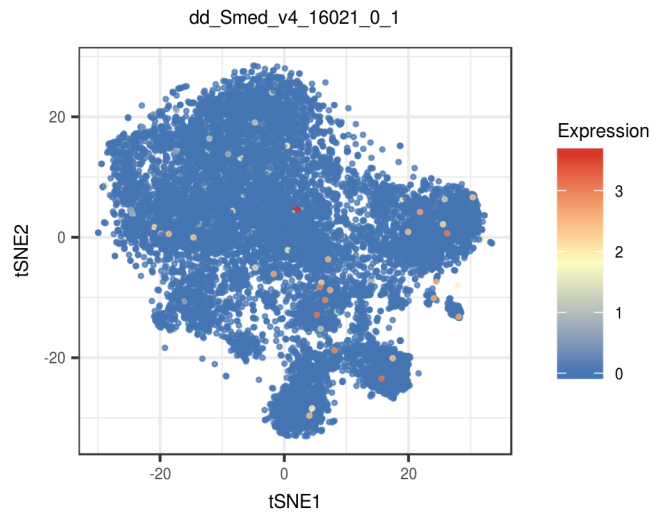

Contig is enriched in the following clusters  
Based on main clustering analysis:  
-----  
Epidermal: 35  
Based on subclustering:  
-----  
Epidermal: 10

**Pseudotime Analysis for epidermal (DVb) lineage**

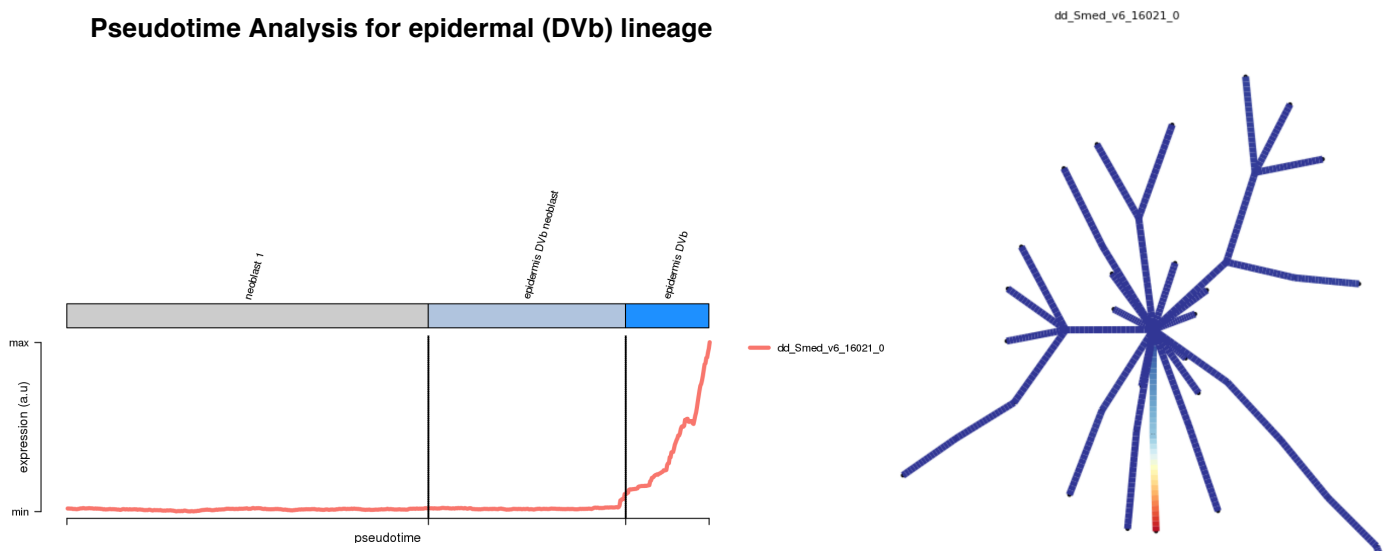

**evx-1**

enrichment in parenchyma

some expression in subset of X1 neoblasts but no enrichment

Overall expression:

Stem Cell expression:

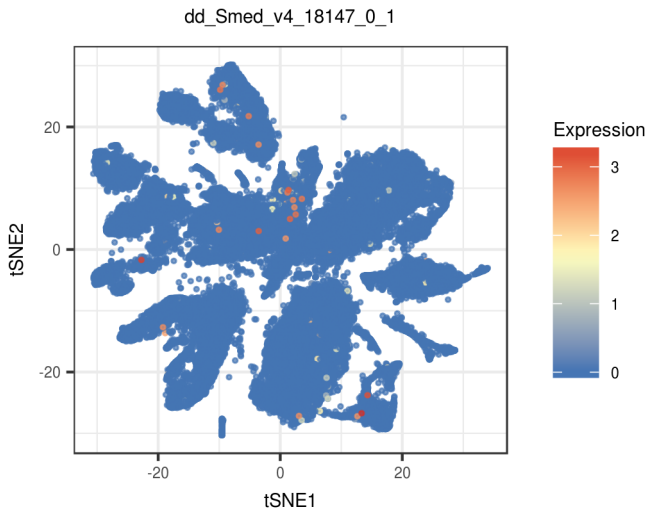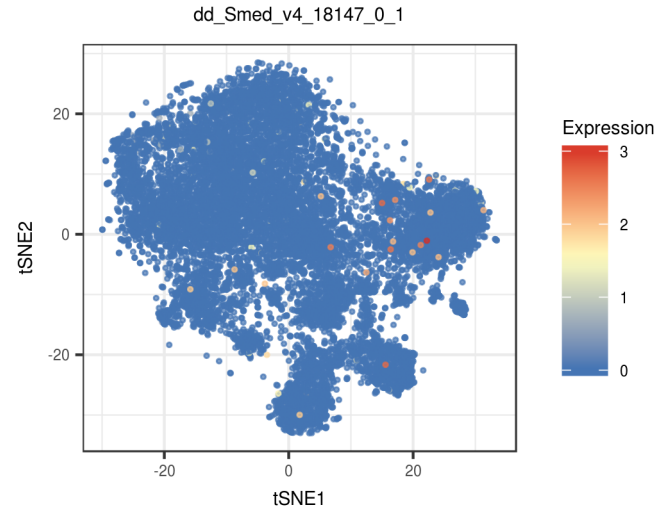

Contig is enriched in the following clusters  
Based on main clustering analysis:  
-----  
Based on subclustering:  
-----  
Parenchymal: 6

**Pseudotime Analysis for secretory 2 lineage:**

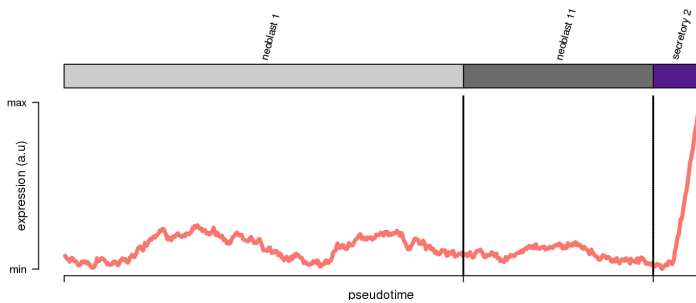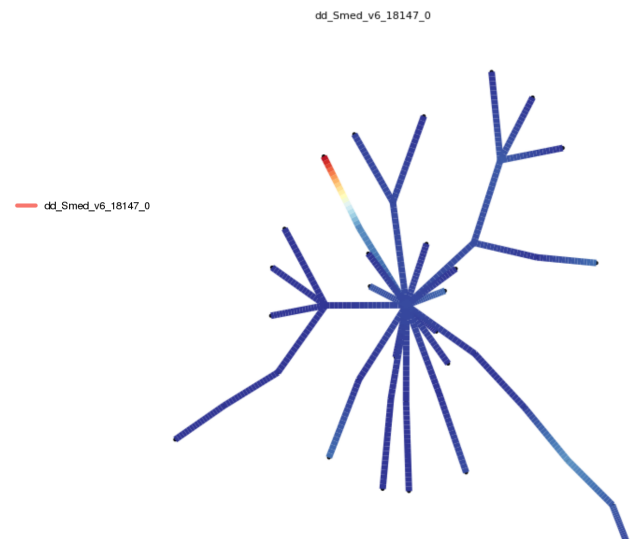

**T-cell leukaemia homeobox 3 (annotated as tlx3)**

enrichment in neural and non-ciliated neurons

some expression in subset of neural X1 neoblasts but no enrichment

Overall expression:

Stem Cell expression:

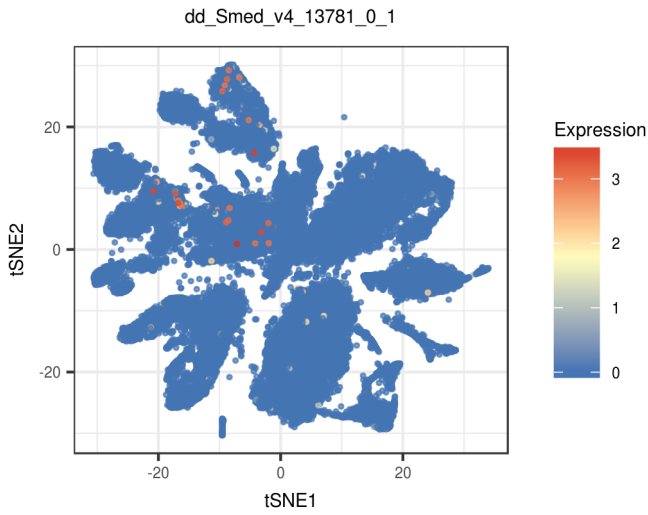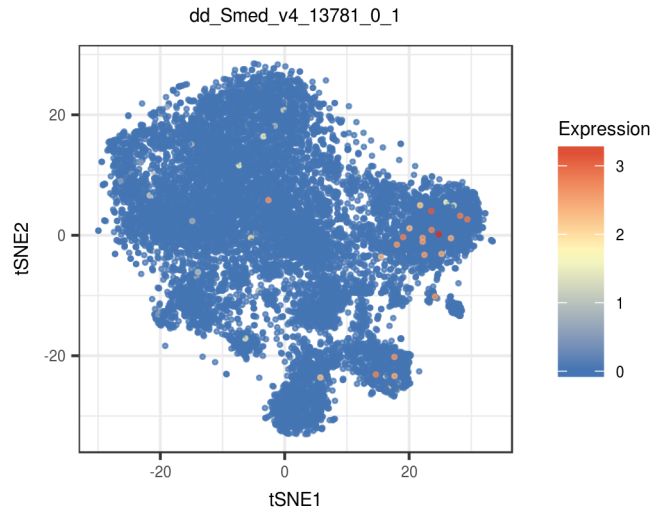

Contig is enriched in the following clusters  
Based on main clustering analysis:  
-----  
  
Based on subclustering:  
-----  
  
Neural: 35  
Non-ciliated neurons: 12, 25

**Pseudotime Analysis for neuronal lineage:**

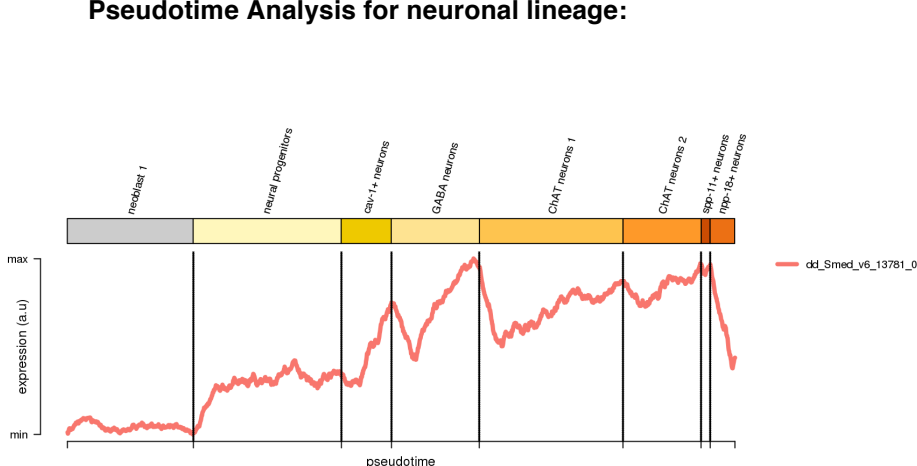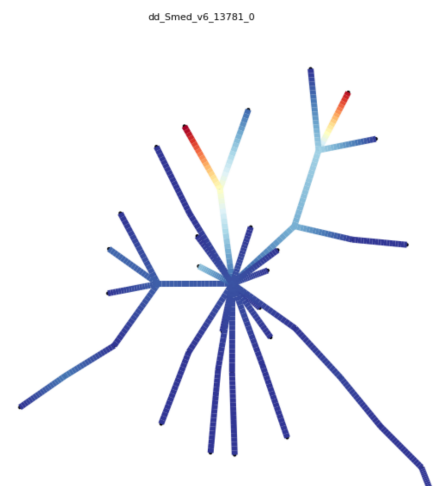

**N.B. Single Cell profiles for the Tbx2 gene in Figure 5 are not included in the Digiworm database, despite having a cognate Dresden ID (dd\_Smed\_v6\_9460\_0\_2).**
