# Supplementary material for: Epigenetic analyses of planarian stem cells demonstrate conservation of bivalent histone modifications in animal stem cells
Source: HighWire-hosted journal article supplement (doi:10.1101/gr.239848.118), 2018-08-24
Supplement: Supplemental_Figure_6.docx [file Supplemental_Figure_6.docx]

**
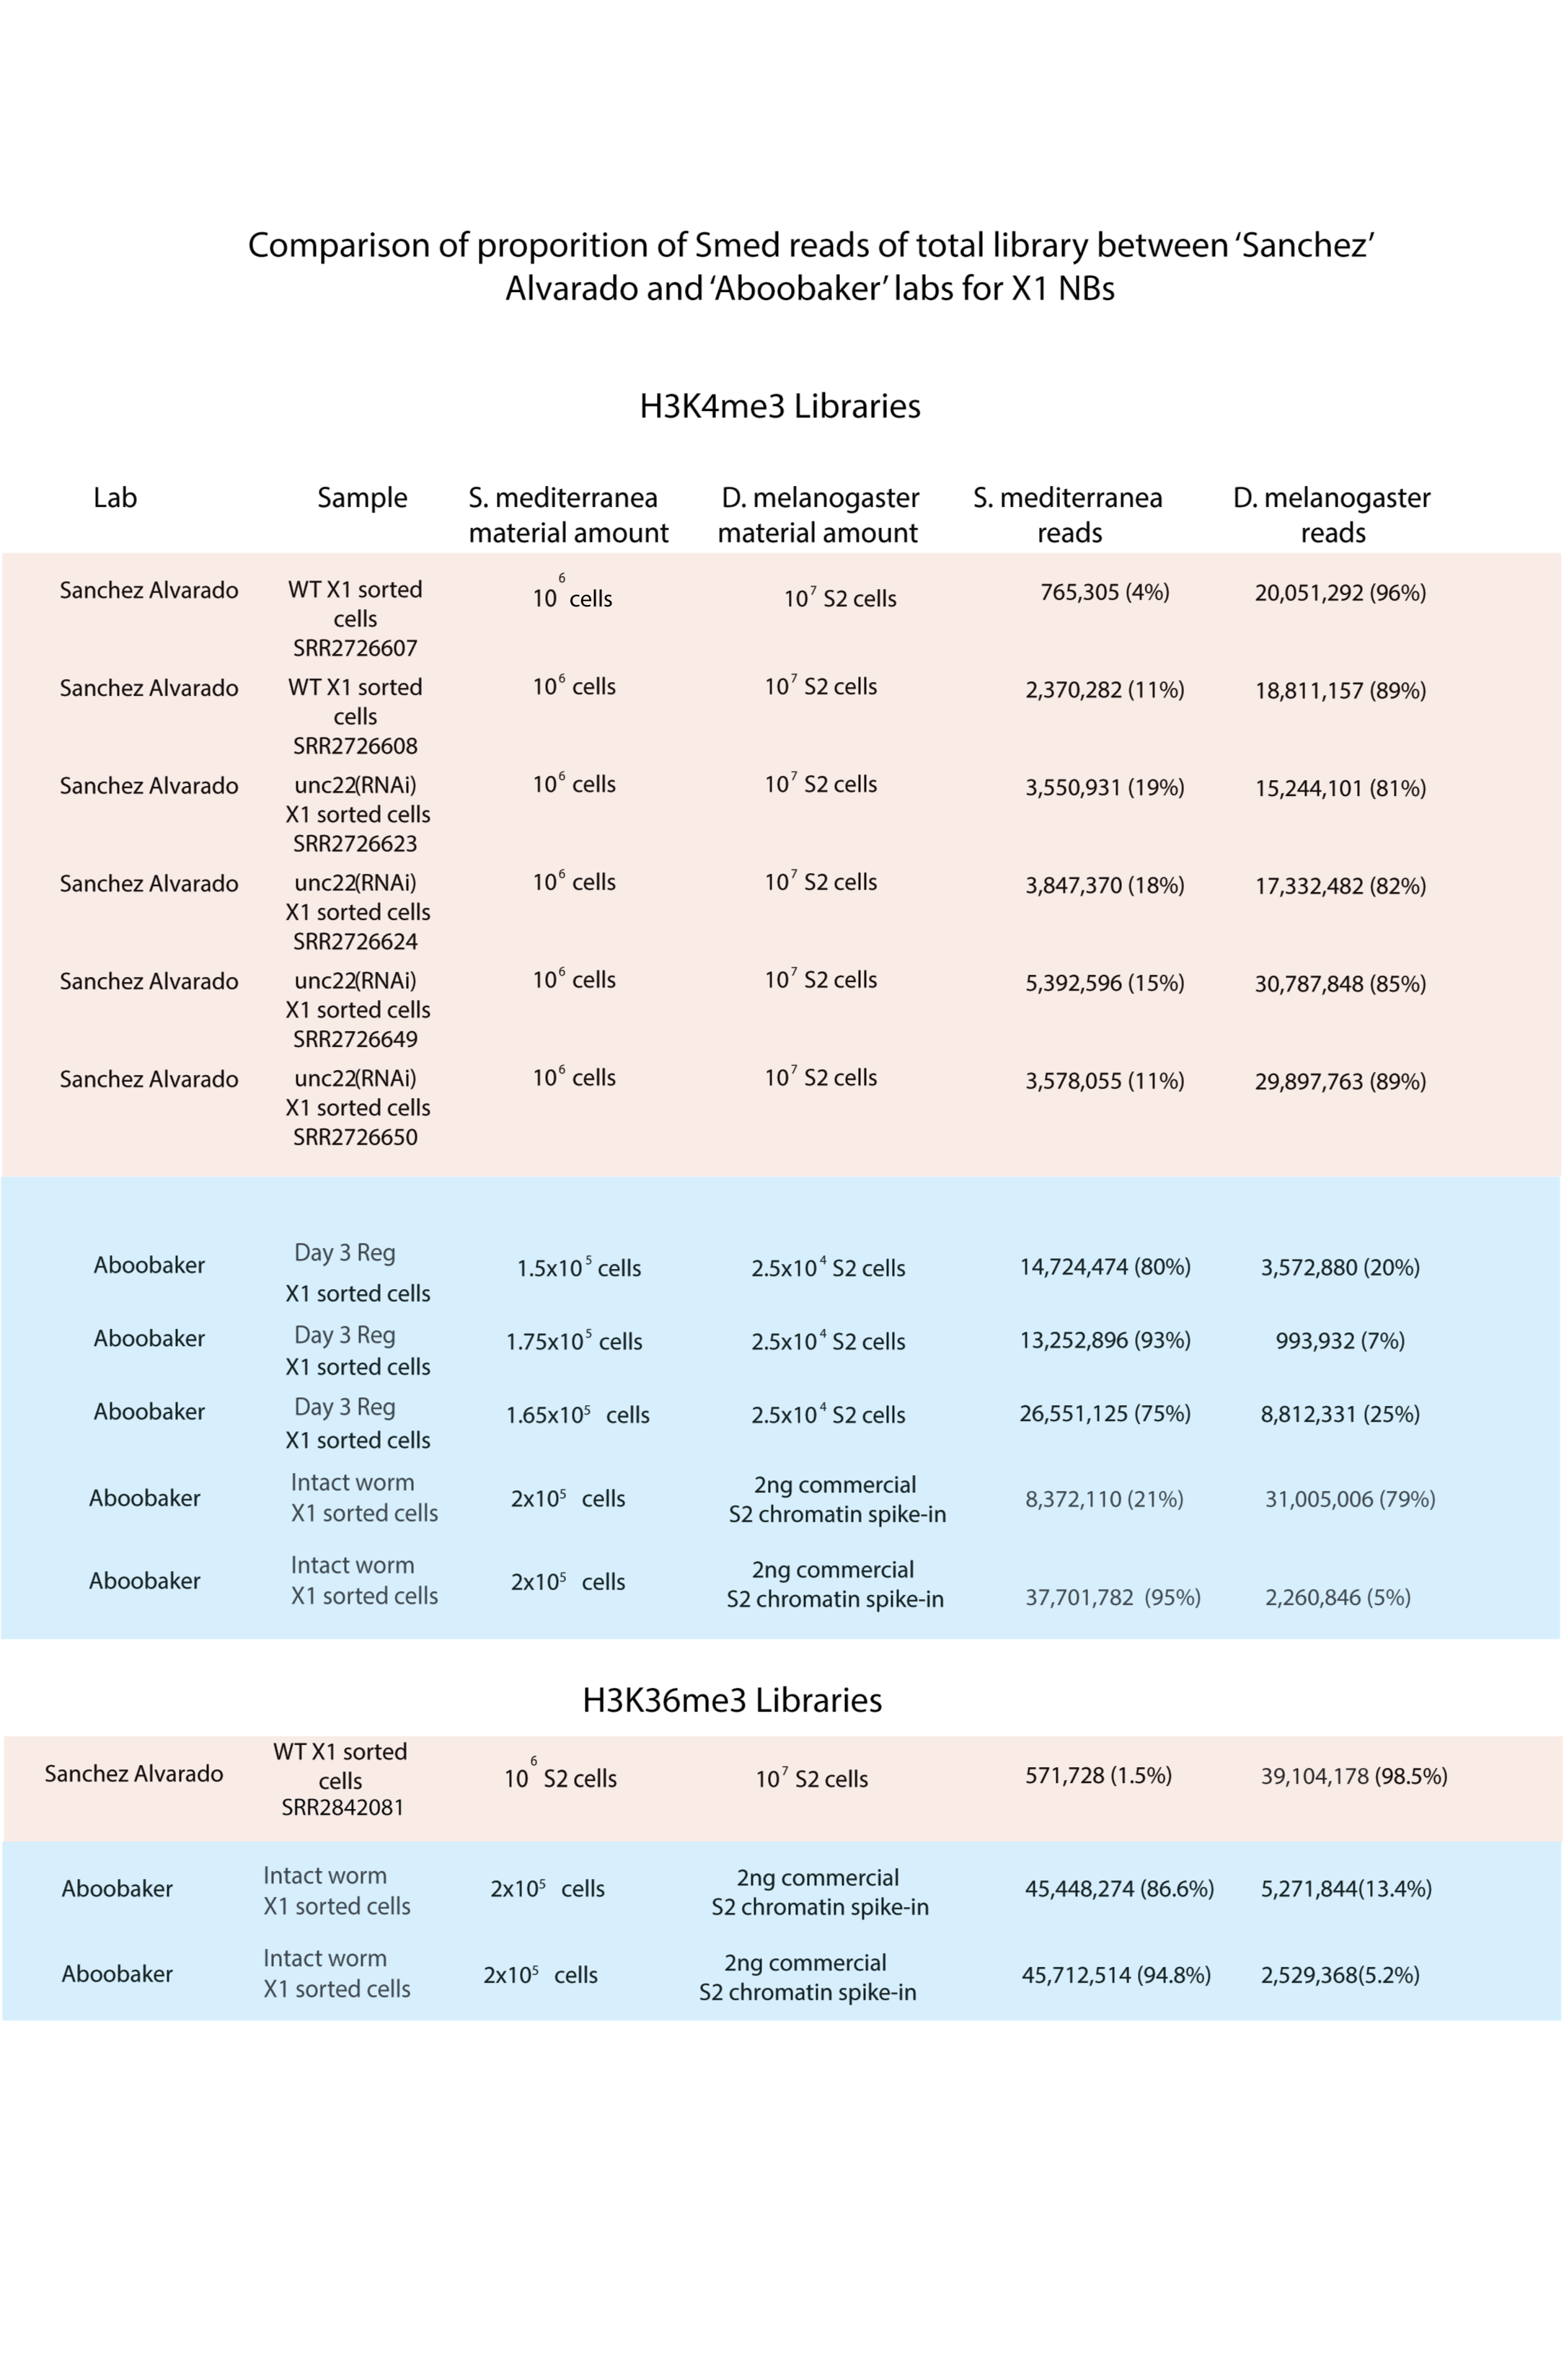
**

**Supplemental Figure 6:**  Comparison of *Drosophila* spike-in reads versus *Schmidtea mediterranea* sample reads for H3K4me3 and H3K36me3 ChIP-seq between this study and a previous one by Duncan et al. 2016. From FACS X1 populations, Duncan et al. 2016 utilised 1million *Schmidtea mediterranea* cells and 10 million *Drosophila* cells to ‘bulk-up’ chromatin input. The final *Schmidtea* reads were between 765k reads to 5.4 million reads for X1 H3K4me3 ChIP-seq and 571,728 reads for X1 H3K36me3 ChIP-seq. For our experiments, we added a *Drosophila* chromatin spike-in estimated to be -3% of our planarian chromatin sample. The final *Schmidtea* reads for our X1 H3K4me3 experiments were between 8.3 – 37 million reads and 45 million for H3K36me3. Thus, we were able to utilise a much smaller planarian chromatin sample amount and achieve a higher number of planarian reads.
