# Supplementary material for: Epigenetic analyses of planarian stem cells demonstrate conservation of bivalent histone modifications in animal stem cells
Source: HighWire-hosted journal article supplement (doi:10.1101/gr.239848.118), 2018-08-24
Supplement: Supplemental_Figure_8.docx [file Supplemental_Figure_8.docx]

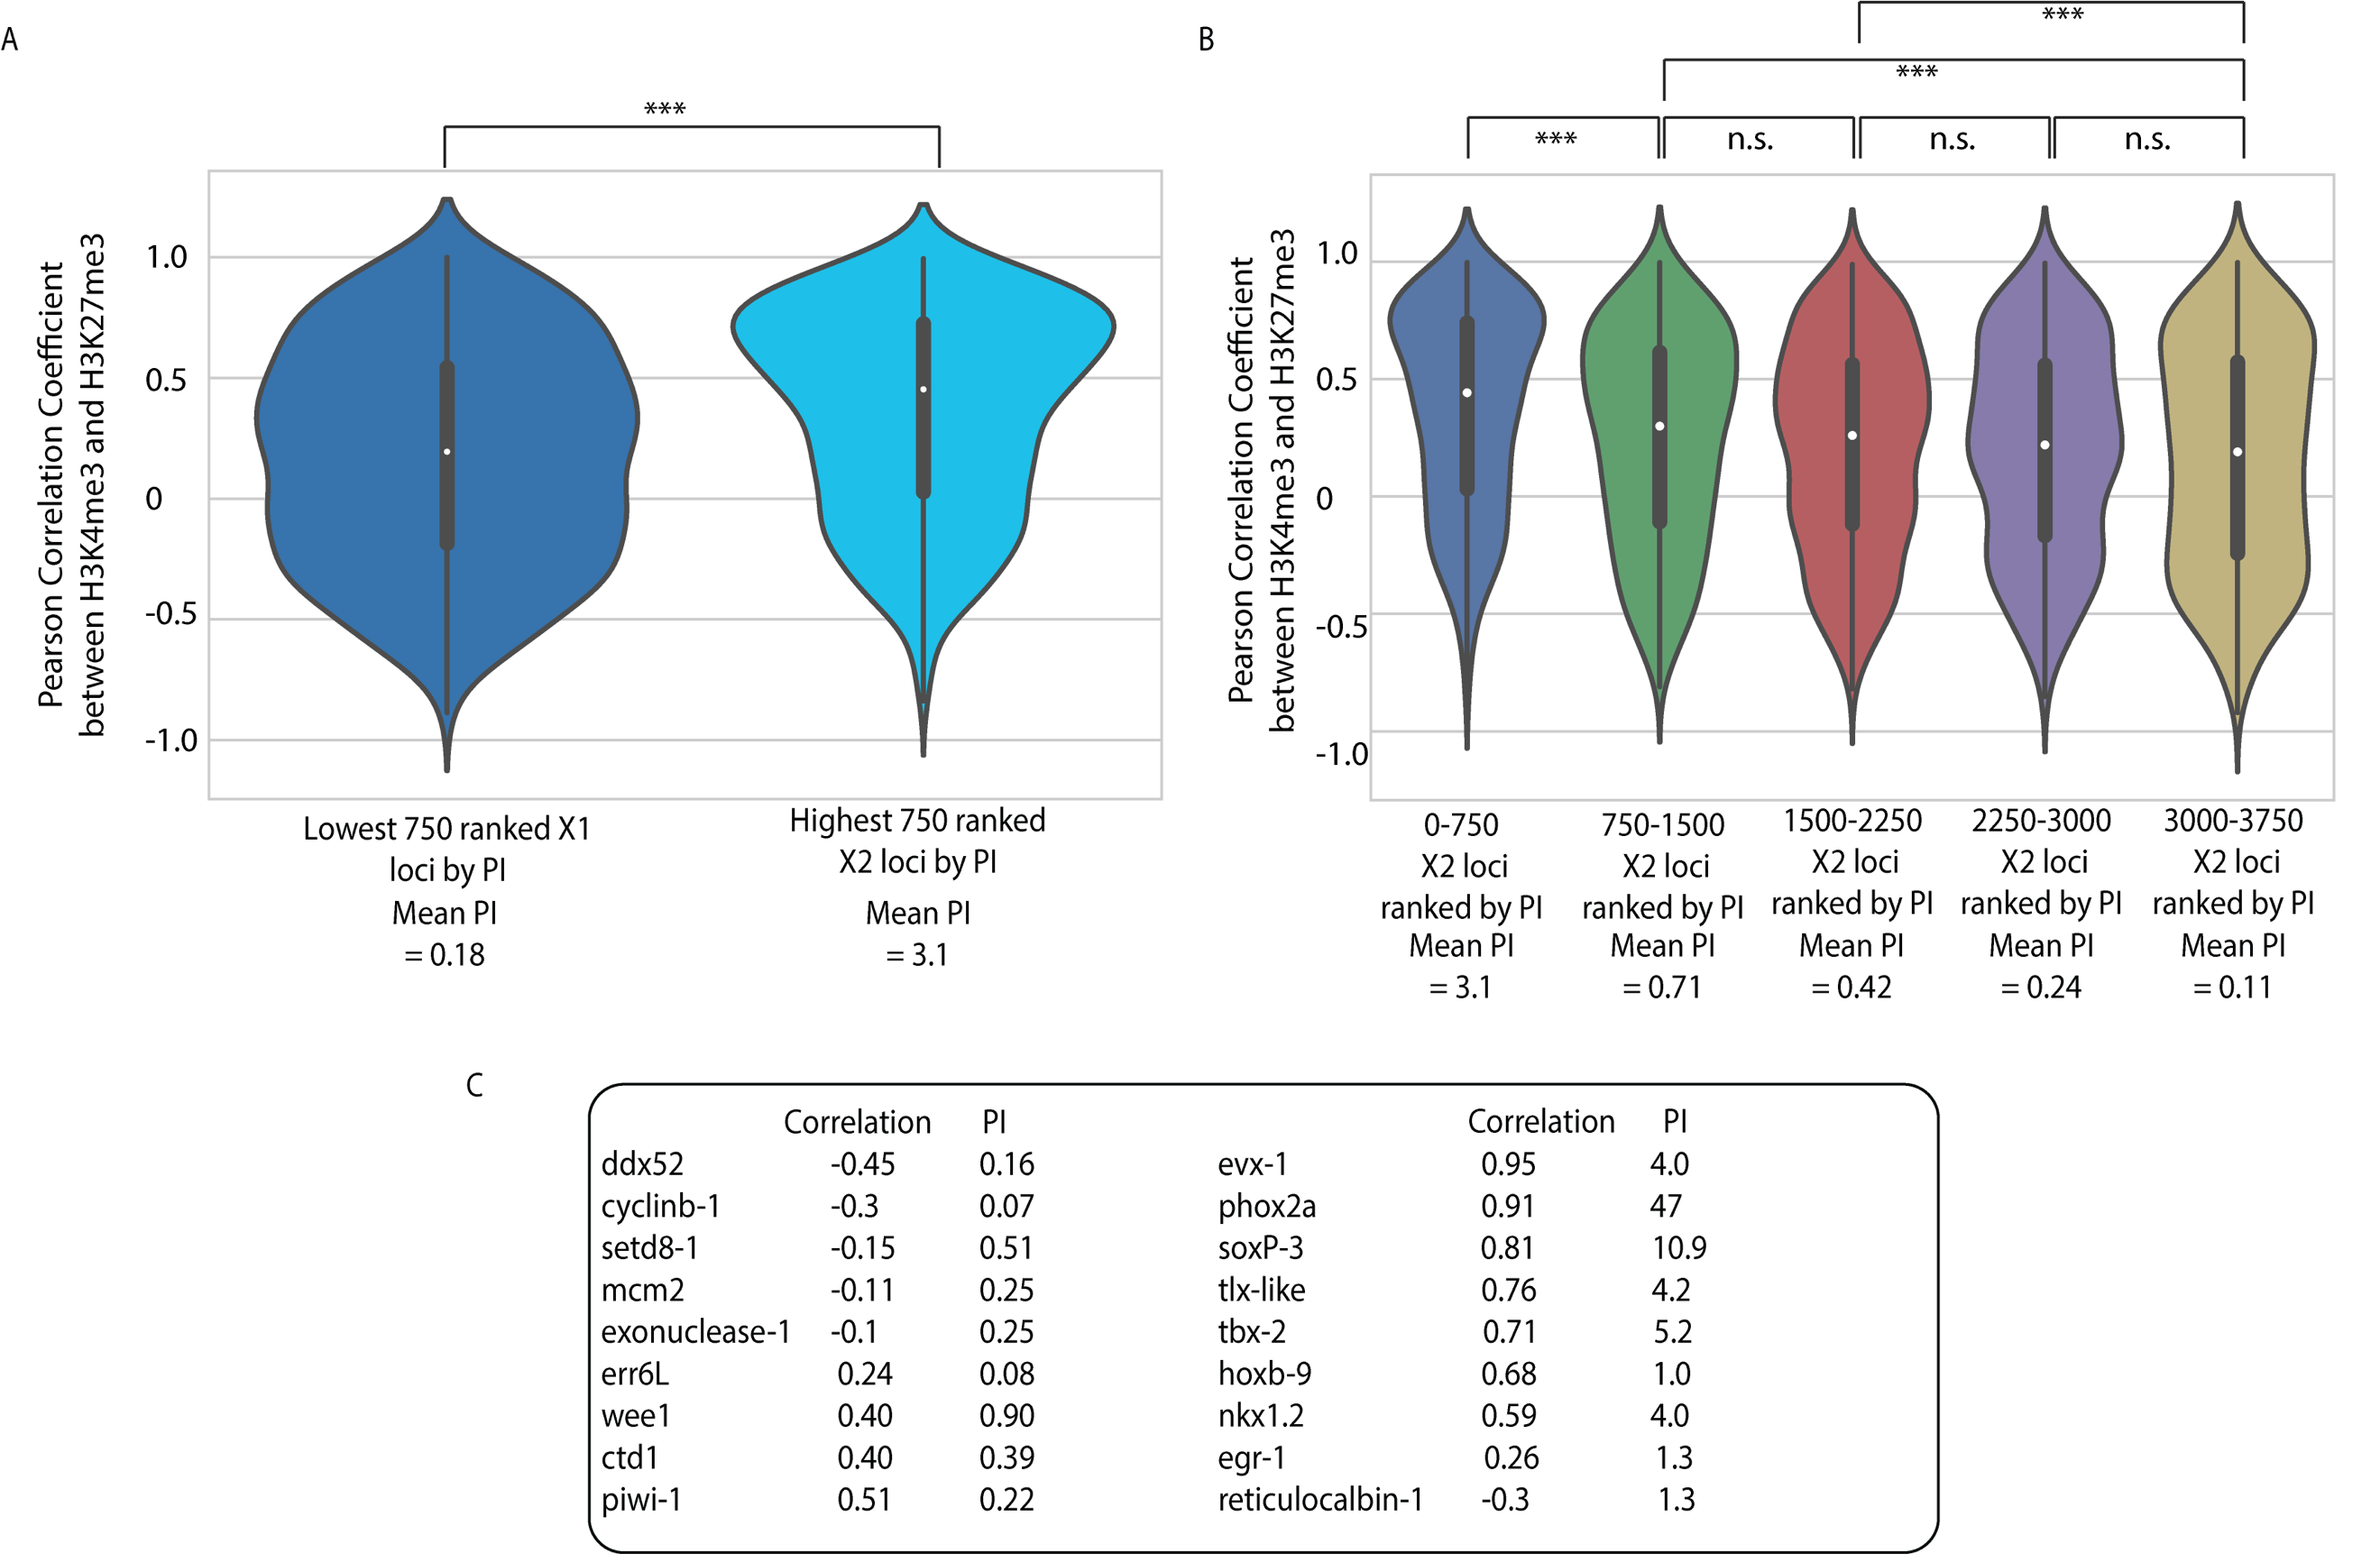


**Supplemental Figure 8: A.** Distribution of Pearson correlation coefficients between H3K4me3 and H3K27me3 for lowest 750 X1 enriched loci ranked by Pausing Index (PI) versus highest 750 X2 enriched loci ranked by PI. A Pearson correlation coefficient between H3K4me3 and HK27me3 percentage coverage at each 50bp window between TSS and 1.75kb upstream of TSS was calculated for each locus. A gene with high Pearson Correlation Coefficient would be, on average, more likely to be bivalent. X2 enriched loci with high PI scores, on average, have higher Pearson correlation coefficients, indicative of a bivalent state. Visual inspection of potential bivalent loci is further required to confirm a paired H3K4me3 and H3K27me3 signal at the TSS. **B**. X2 enriched loci (>1kb) split into rank order of PI. X2 enriched genes with high PI scores have, on average, higher Pearson Correlation Coefficients between H3K4me3 and H3K27me3. As PI decreases, so does the Pearson correlation coefficient. **C.** Individual Pearson correlation coefficients and Pausing Index scores for X1 enriched loci (as in Figure 1) and X2 bivalent loci (as in Figure 5). Again, on average, X2 loci have a higher Pearson correlation coefficient than X1 loci but individual gene ChIP-seq tracks must be inspected to verify paired H3K4me3 and H3K27me3 signal as this calculation does not take into account absolute magnitude of signal. For example, *piwi-1* does not fit the expected trend owing to H3K27me3 signal in introns (resulting in a higher than expected Pearson Correlation Coefficient between H3K4me3 and H3K27me3) and *reticulocalbin-1* has a broad H3K27me3 signal compared to H3K4me3 (resulting in a lower than expected Pearson Correlation Coefficient).
