# Supplementary material for: Epigenetic analyses of planarian stem cells demonstrate conservation of bivalent histone modifications in animal stem cells
Source: HighWire-hosted journal article supplement (doi:10.1101/gr.239848.118), 2018-08-24
Supplement: Supplemental_File_7.xlsx [file Supplemental_File_7.xlsx]

## Sheet: Sheet1
Locus ID	X1 proportion	X2 proportion	Xins proportion
asx1.1_ox1.0.loc.08652	32.407	51.7097	15.8833
asx1.1_ox1.0.loc.14331	5.25547	86.0485	8.696
asx1.1_ox1.0.loc.08650	34.7306	39.071	26.1984
asx1.1_ox1.0.loc.08651	50.9929	28.7019	20.3052
asx1.1_ox1.0.loc.08656	27.62	63.7021	8.6779
asx1.1_ox1.0.loc.14335	45.1487	43.7006	11.1507
asx1.1_ox1.0.loc.08654	30.3488	59.7794	9.8718
asx1.1_ox1.0.loc.08655	30.3488	59.7794	9.8718
asx1.1_ox1.0.loc.14338	14.8078	76.9799	8.21234
asx1.1_ox1.0.loc.14339	34.2905	48.2119	17.4976
asx1.1_ox1.0.loc.08658	1.13762	20.2658	78.5966
asx1.1_ox1.0.loc.16333	13.917	57.8003	28.2827
asx1.1_ox1.0.loc.19579	32.7245	46.0478	21.2277
asx1.1_ox1.0.loc.19578	28.8253	41.2102	29.9646
asx1.1_ox1.0.loc.19575	21.5468	36.2227	42.2305
asx1.1_ox1.0.loc.19574	19.9071	17.6765	62.4164
asx1.1_ox1.0.loc.19577	54.6227	43.3402	2.03711
asx1.1_ox1.0.loc.19576	36.9015	61.1915	1.90704
asx1.1_ox1.0.loc.19570	17.948	46.852	35.2
asx1.1_ox1.0.loc.19573	21.1505	18.8277	60.0218
asx1.1_ox1.0.loc.19572	17.2157	46.8751	35.9093
asx1.1_ox1.0.loc.35933	26.4502	49.8468	23.703
asx1.1_ox1.0.loc.35930	3.65698	92.2701	4.07294
asx1.1_ox1.0.loc.35937	22.5514	68.9764	8.47215
asx1.1_ox1.0.loc.35936	17.8661	21.6476	60.4863
asx1.1_ox1.0.loc.22066	5.6511	70.3075	24.0414
asx1.1_ox1.0.loc.35934	8.66045	60.8735	30.4661
asx1.1_ox1.0.loc.35938	0.96948	67.3253	31.7052
asx1.1_ox1.0.loc.06548	25.4284	55.7774	18.7942
asx1.1_ox1.0.loc.06544	34.7038	47.4977	17.7985
asx1.1_ox1.0.loc.06545	24.4103	54.0834	21.5063
asx1.1_ox1.0.loc.06546	42.7403	30.9653	26.2944
asx1.1_ox1.0.loc.06547	35.2885	55.0624	9.64908
asx1.1_ox1.0.loc.06541	27.8682	63.9596	8.17214
asx1.1_ox1.0.loc.06542	16.1821	57.7928	26.025
asx1.1_ox1.0.loc.26983	34.6958	55.5392	9.76495
asx1.1_ox1.0.loc.07639	1.84378	12.7822	85.374
asx1.1_ox1.0.loc.07638	28.8089	16.9907	54.2004
asx1.1_ox1.0.loc.07635	14.7304	27.1672	58.1024
asx1.1_ox1.0.loc.07634	33.2229	57.0842	9.69287
asx1.1_ox1.0.loc.07637	36.578	45.2032	18.2189
asx1.1_ox1.0.loc.07636	28.9908	67.6849	3.32427
asx1.1_ox1.0.loc.07630	38.6648	46.2665	15.0687
asx1.1_ox1.0.loc.07632	5.86585	57.2183	36.9158
asx1.1_ox1.0.loc.30145	9.51754	61.8408	28.6416
asx1.1_ox1.0.loc.30144	20.1365	28.932	50.9316
asx1.1_ox1.0.loc.30147	31.0597	34.7281	34.2121
asx1.1_ox1.0.loc.30146	5.94256	81.3409	12.7165
asx1.1_ox1.0.loc.30141	11.023	21.0486	67.9284
asx1.1_ox1.0.loc.30140	30.4851	40.1473	29.3676
asx1.1_ox1.0.loc.30142	17.0858	52.9984	29.9158
asx1.1_ox1.0.loc.09295	30.3494	56.2395	13.4111
asx1.1_ox1.0.loc.09294	32.8989	51.4897	15.6114
asx1.1_ox1.0.loc.09297	4.17459	46.2346	49.5908
asx1.1_ox1.0.loc.30149	41.4231	45.2469	13.33
asx1.1_ox1.0.loc.30148	5.64183	4.70236	89.6558
asx1.1_ox1.0.loc.09293	24.8717	60.0443	15.084
asx1.1_ox1.0.loc.09292	25.1867	48.793	26.0202
asx1.1_ox1.0.loc.26331	0.769559	4.90715	94.3233
asx1.1_ox1.0.loc.26330	42.122	46.9101	10.9679
asx1.1_ox1.0.loc.26332	1.40066	3.9399	94.6594
asx1.1_ox1.0.loc.26335	41.6966	51.8726	6.43089
asx1.1_ox1.0.loc.26337	30.4395	33.7987	35.7618
asx1.1_ox1.0.loc.26336	2.83344	29.4033	67.7632
asx1.1_ox1.0.loc.26339	53.2862	39.8909	6.82291
asx1.1_ox1.0.loc.25392	53.5383	40.3581	6.10365
asx1.1_ox1.0.loc.08653	6.28202	54.8376	38.8803
asx1.1_ox1.0.loc.29318	65.0657	34.1035	0.830777
asx1.1_ox1.0.loc.29319	30.2334	55.7335	14.0331
asx1.1_ox1.0.loc.29312	0.862855	3.04667	96.0905
asx1.1_ox1.0.loc.14334	22.5995	57.254	20.1465
asx1.1_ox1.0.loc.29310	36.4965	39.8762	23.6273
asx1.1_ox1.0.loc.25399	3.18547	32.8078	64.0067
asx1.1_ox1.0.loc.29316	42.6167	37.6194	19.7639
asx1.1_ox1.0.loc.29317	3.41509	1.70754	94.8774
asx1.1_ox1.0.loc.29314	0.00114074	6.03534	93.9635
asx1.1_ox1.0.loc.29315	14.9122	16.3725	68.7153
asx1.1_ox1.0.loc.14336	29.2291	61.9903	8.78059
asx1.1_ox1.0.loc.14337	26.8077	69.4999	3.69236
asx1.1_ox1.0.loc.38292	20.5337	39.7332	39.7332
asx1.1_ox1.0.loc.11209	4.02048	24.3363	71.6432
asx1.1_ox1.0.loc.11203	10.9145	31.225	57.8606
asx1.1_ox1.0.loc.11202	36.0629	49.6739	14.2632
asx1.1_ox1.0.loc.11201	17.3389	42.686	39.9751
asx1.1_ox1.0.loc.11200	5.26564	18.0332	76.7012
asx1.1_ox1.0.loc.11206	5.58842	25.6149	68.7967
asx1.1_ox1.0.loc.11205	15.4404	22.2227	62.3369
asx1.1_ox1.0.loc.21947	15.9049	21.0467	63.0484
asx1.1_ox1.0.loc.21946	36.7575	53.8248	9.41772
asx1.1_ox1.0.loc.21945	16.1228	53.6561	30.2211
asx1.1_ox1.0.loc.21944	29.4907	58.0415	12.4678
asx1.1_ox1.0.loc.21943	39.53	54.3012	6.16882
asx1.1_ox1.0.loc.21942	50.9118	40.0064	9.08181
asx1.1_ox1.0.loc.21941	54.4533	32.7106	12.836
asx1.1_ox1.0.loc.37262	55.0022	41.8113	3.18648
asx1.1_ox1.0.loc.22362	46.2662	47.9965	5.73731
asx1.1_ox1.0.loc.22360	30.7008	54.5936	14.7056
asx1.1_ox1.0.loc.22361	52.6231	35.4985	11.8784
asx1.1_ox1.0.loc.22366	4.60419	22.7878	72.608
asx1.1_ox1.0.loc.22367	5.2448	23.0635	71.6917
asx1.1_ox1.0.loc.22364	3.58442	59.0812	37.3344
asx1.1_ox1.0.loc.06847	54.3099	38.9405	6.74969
asx1.1_ox1.0.loc.22619	29.4016	42.7035	27.8949
asx1.1_ox1.0.loc.16527	5.64172	5.35753	89.0007
asx1.1_ox1.0.loc.22617	24.0605	48.006	27.9335
asx1.1_ox1.0.loc.10158	34.1291	48.1438	17.7271
asx1.1_ox1.0.loc.10159	20.7579	21.5687	57.6734
asx1.1_ox1.0.loc.09907	11.6286	47.9611	40.4103
asx1.1_ox1.0.loc.22615	28.223	60.1226	11.6544
asx1.1_ox1.0.loc.09901	35.1672	33.2357	31.5971
asx1.1_ox1.0.loc.09902	21.0184	57.6931	21.2885
asx1.1_ox1.0.loc.10150	14.4846	76.4007	9.11464
asx1.1_ox1.0.loc.10151	32.1185	61.3578	6.52369
asx1.1_ox1.0.loc.10153	38.1225	41.7425	20.1351
asx1.1_ox1.0.loc.09909	24.8766	52.52	22.6035
asx1.1_ox1.0.loc.09908	36.5682	55.6452	7.78659
asx1.1_ox1.0.loc.10156	26.3253	72.7264	0.948325
asx1.1_ox1.0.loc.10157	42.9994	56.4948	0.505773
asx1.1_ox1.0.loc.22610	10.5237	66.063	23.4133
asx1.1_ox1.0.loc.22611	18.1048	70.5831	11.3121
asx1.1_ox1.0.loc.22621	45.2986	40.6735	14.0279
asx1.1_ox1.0.loc.24409	30.5935	42.2503	27.1562
asx1.1_ox1.0.loc.24403	38.7068	57.9223	3.37092
asx1.1_ox1.0.loc.24404	8.40316	30.4818	61.115
asx1.1_ox1.0.loc.24407	28.0617	58.7144	13.224
asx1.1_ox1.0.loc.24406	38.1036	44.6731	17.2233
asx1.1_ox1.0.loc.17313	50.0516	30.5117	19.4367
asx1.1_ox1.0.loc.17312	43.9924	39.7775	16.23
asx1.1_ox1.0.loc.17311	31.0606	44.7294	24.21
asx1.1_ox1.0.loc.17310	55.5175	35.9719	8.51054
asx1.1_ox1.0.loc.17317	26.5645	38.8015	34.6341
asx1.1_ox1.0.loc.17316	34.0299	26.3517	39.6185
asx1.1_ox1.0.loc.17315	2.43093	4.11292	93.4562
asx1.1_ox1.0.loc.17314	36.456	42.2882	21.2558
asx1.1_ox1.0.loc.25754	6.12947	17.0551	76.8154
asx1.1_ox1.0.loc.25755	52.2408	47.04	0.719241
asx1.1_ox1.0.loc.25753	7.6763	31.0971	61.2266
asx1.1_ox1.0.loc.25750	25.1398	33.594	41.2663
asx1.1_ox1.0.loc.21278	5.38159	12.376	82.2424
asx1.1_ox1.0.loc.25758	25.9729	54.7787	19.2484
asx1.1_ox1.0.loc.25759	26.3148	51.6929	21.9923
asx1.1_ox1.0.loc.34732	20.8119	31.6015	47.5866
asx1.1_ox1.0.loc.27459	28.1426	43.717	28.1403
asx1.1_ox1.0.loc.27454	73.6876	23.9701	2.34229
asx1.1_ox1.0.loc.27453	47.4755	45.8237	6.70083
asx1.1_ox1.0.loc.27452	12.7781	41.8033	45.4186
asx1.1_ox1.0.loc.27451	10.8665	52.4073	36.7263
asx1.1_ox1.0.loc.27450	1.92246	6.05599	92.0215
asx1.1_ox1.0.loc.21121	3.57546	6.52922	89.8953
asx1.1_ox1.0.loc.21120	22.6271	28.1628	49.2101
asx1.1_ox1.0.loc.21123	25.4804	43.0575	31.4621
asx1.1_ox1.0.loc.21122	33.8157	49.0896	17.0947
asx1.1_ox1.0.loc.21125	45.1325	26.0597	28.8078
asx1.1_ox1.0.loc.21124	9.85726	45.6171	44.5256
asx1.1_ox1.0.loc.21127	11.2224	48.726	40.0516
asx1.1_ox1.0.loc.21126	3.93201	9.70254	86.3655
asx1.1_ox1.0.loc.34739	29.574	59.5909	10.835
asx1.1_ox1.0.loc.04418	40.1659	53.4986	6.33555
asx1.1_ox1.0.loc.04419	44.5909	48.6192	6.78997
asx1.1_ox1.0.loc.04414	29.279	51.7526	18.9685
asx1.1_ox1.0.loc.04415	25.5323	42.4533	32.0144
asx1.1_ox1.0.loc.04416	2.59675	21.3601	76.0431
asx1.1_ox1.0.loc.04410	5.58976	15.9777	78.4326
asx1.1_ox1.0.loc.04411	6.93976	19.5634	73.4968
asx1.1_ox1.0.loc.04412	3.88163	18.2638	77.8546
asx1.1_ox1.0.loc.04413	37.2657	39.6761	23.0581
asx1.1_ox1.0.loc.13542	19.6688	61.2	19.1312
asx1.1_ox1.0.loc.13540	17.1249	70.3102	12.5649
asx1.1_ox1.0.loc.35935	20.6451	39.7242	39.6306
asx1.1_ox1.0.loc.13544	39.3831	52.1766	8.44033
asx1.1_ox1.0.loc.13548	7.27291	46.2473	46.4798
asx1.1_ox1.0.loc.26476	47.3221	28.8094	23.8686
asx1.1_ox1.0.loc.26477	13.3349	25.1646	61.5005
asx1.1_ox1.0.loc.26475	63.4462	32.5945	3.95931
asx1.1_ox1.0.loc.26472	11.6031	57.1423	31.2545
asx1.1_ox1.0.loc.26473	12.9692	49.058	37.9728
asx1.1_ox1.0.loc.26470	39.1986	56.7171	4.08428
asx1.1_ox1.0.loc.26471	32.0799	51.1309	16.7893
asx1.1_ox1.0.loc.26478	33.5439	41.087	25.3692
asx1.1_ox1.0.loc.26479	39.1629	52.3135	8.52358
asx1.1_ox1.0.loc.15261	18.8882	68.5809	12.5309
asx1.1_ox1.0.loc.15263	7.3237	60.4223	32.254
asx1.1_ox1.0.loc.15264	39.2537	50.6869	10.0595
asx1.1_ox1.0.loc.15267	4.512	18.9072	76.5808
asx1.1_ox1.0.loc.15266	36.08	47.5068	16.4133
asx1.1_ox1.0.loc.15268	26.0544	45.0538	28.8919
asx1.1_ox1.0.loc.11948	3.00261	18.5451	78.4523
asx1.1_ox1.0.loc.11949	31.1418	45.3015	23.5567
asx1.1_ox1.0.loc.11944	15.3063	30.6809	54.0128
asx1.1_ox1.0.loc.11946	29.6323	41.3108	29.0569
asx1.1_ox1.0.loc.11941	4.98445	29.8075	65.208
asx1.1_ox1.0.loc.11943	44.4576	30.2122	25.3302
asx1.1_ox1.0.loc.14138	24.16	26.3638	49.4762
asx1.1_ox1.0.loc.14139	49.615	40.6228	9.76221
asx1.1_ox1.0.loc.14136	18.9885	52.844	28.1675
asx1.1_ox1.0.loc.14137	9.73202	26.1146	64.1534
asx1.1_ox1.0.loc.14132	61.3993	32.1285	6.47217
asx1.1_ox1.0.loc.14133	41.199	23.1067	35.6943
asx1.1_ox1.0.loc.07757	40.8468	46.8938	12.2594
asx1.1_ox1.0.loc.19431	46.5601	21.9193	31.5206
asx1.1_ox1.0.loc.00883	36.6351	42.4781	20.8868
asx1.1_ox1.0.loc.00882	46.6092	41.0086	12.3821
asx1.1_ox1.0.loc.00887	16.1982	64.3385	19.4633
asx1.1_ox1.0.loc.00886	11.3352	64.9622	23.7026
asx1.1_ox1.0.loc.00885	20.3803	64.131	15.4887
asx1.1_ox1.0.loc.00884	28.914	52.8932	18.1928
asx1.1_ox1.0.loc.00889	6.76862	50.4163	42.815
asx1.1_ox1.0.loc.00888	7.96781	36.2984	55.7338
asx1.1_ox1.0.loc.34868	69.7919	28.0625	2.14556
asx1.1_ox1.0.loc.34869	2.62066	5.55854	91.8208
asx1.1_ox1.0.loc.34866	69.9482	26.8432	3.20851
asx1.1_ox1.0.loc.34864	3.53736	14.9476	81.515
asx1.1_ox1.0.loc.34865	73.8937	24.6669	1.43945
asx1.1_ox1.0.loc.34862	4.39392	60.95	34.6561
asx1.1_ox1.0.loc.34863	3.36747	27.5062	69.1263
asx1.1_ox1.0.loc.34861	1.4249	29.4226	69.1525
asx1.1_ox1.0.loc.18932	40.5638	49.9801	9.45612
asx1.1_ox1.0.loc.18933	29.9268	27.8641	42.2091
asx1.1_ox1.0.loc.18930	27.7951	60.9361	11.2687
asx1.1_ox1.0.loc.18931	28.569	53.419	18.0119
asx1.1_ox1.0.loc.18936	4.10807	74.4437	21.4483
asx1.1_ox1.0.loc.18937	5.61015	73.4749	20.9149
asx1.1_ox1.0.loc.18935	1.51509	9.64332	88.8416
asx1.1_ox1.0.loc.18938	17.2127	38.2636	44.5237
asx1.1_ox1.0.loc.18939	7.5243	27.4154	65.0603
asx1.1_ox1.0.loc.28209	21.9585	10.8173	67.2242
asx1.1_ox1.0.loc.28202	9.80107	23.598	66.6009
asx1.1_ox1.0.loc.28201	52.9474	42.1096	4.94305
asx1.1_ox1.0.loc.28207	32.5556	53.1773	14.2672
asx1.1_ox1.0.loc.28206	23.1119	37.7423	39.1458
asx1.1_ox1.0.loc.28205	40.8498	43.5344	15.6158
asx1.1_ox1.0.loc.28204	30.3047	47.1504	22.5449
asx1.1_ox1.0.loc.35409	20.3634	55.3972	24.2395
asx1.1_ox1.0.loc.35404	42.7598	36.8531	20.3871
asx1.1_ox1.0.loc.35403	27.8783	37.414	34.7077
asx1.1_ox1.0.loc.35402	22.428	50.3226	27.2495
asx1.1_ox1.0.loc.35401	24.738	12.1477	63.1142
asx1.1_ox1.0.loc.35400	19.1995	67.7273	13.0732
asx1.1_ox1.0.loc.29158	54.2487	17.0376	28.7137
asx1.1_ox1.0.loc.32836	5.42226	18.809	75.7688
asx1.1_ox1.0.loc.32835	4.31397	33.7196	61.9664
asx1.1_ox1.0.loc.32834	32.1387	32.9888	34.8725
asx1.1_ox1.0.loc.32833	22.675	52.9224	24.4026
asx1.1_ox1.0.loc.32832	19.6845	38.1759	42.1396
asx1.1_ox1.0.loc.32831	4.10097	44.5552	51.3438
asx1.1_ox1.0.loc.32830	23.7803	74.0016	2.21812
asx1.1_ox1.0.loc.29150	20.0027	44.4324	35.5649
asx1.1_ox1.0.loc.29151	2.63845	86.853	10.5085
asx1.1_ox1.0.loc.29152	3.68408	74.9549	21.361
asx1.1_ox1.0.loc.29155	11.5496	34.0949	54.3555
asx1.1_ox1.0.loc.29156	22.789	48.1133	29.0977
asx1.1_ox1.0.loc.29157	27.9978	49.6332	22.369
asx1.1_ox1.0.loc.01828	33.47	37.7584	28.7715
asx1.1_ox1.0.loc.01822	9.50037	43.5344	46.9652
asx1.1_ox1.0.loc.01823	5.86049	55.0195	39.12
asx1.1_ox1.0.loc.01821	37.3626	60.4877	2.14969
asx1.1_ox1.0.loc.01826	44.0009	28.4528	27.5462
asx1.1_ox1.0.loc.01827	38.1933	51.3406	10.4661
asx1.1_ox1.0.loc.01824	13.6374	43.8294	42.5332
asx1.1_ox1.0.loc.04279	49.8756	36.1415	13.9828
asx1.1_ox1.0.loc.30579	3.55977	34.6123	61.828
asx1.1_ox1.0.loc.30574	21.198	29.0128	49.7891
asx1.1_ox1.0.loc.30575	30.7895	31.4657	37.7448
asx1.1_ox1.0.loc.30576	36.2921	41.7668	21.9411
asx1.1_ox1.0.loc.30570	20.6146	34.5712	44.8142
asx1.1_ox1.0.loc.30571	31.2714	57.7139	11.0147
asx1.1_ox1.0.loc.14909	78.7879	18.2901	2.92205
asx1.1_ox1.0.loc.14908	29.5407	47.036	23.4233
asx1.1_ox1.0.loc.14907	28.8001	44.8871	26.3128
asx1.1_ox1.0.loc.14906	45.544	26.8641	27.5919
asx1.1_ox1.0.loc.14905	13.1084	85.587	1.30461
asx1.1_ox1.0.loc.14904	51.1757	35.175	13.6493
asx1.1_ox1.0.loc.14903	4.82373	25.7898	69.3865
asx1.1_ox1.0.loc.38389	42.3029	42.8393	14.8578
asx1.1_ox1.0.loc.38388	15.6685	72.9345	11.3969
asx1.1_ox1.0.loc.04272	52.5763	46.7128	0.710911
asx1.1_ox1.0.loc.38383	15.2015	55.2638	29.5347
asx1.1_ox1.0.loc.38382	11.1786	44.5115	44.3099
asx1.1_ox1.0.loc.38381	12.8326	19.6095	67.5579
asx1.1_ox1.0.loc.38387	80.8252	18.8604	0.314466
asx1.1_ox1.0.loc.38386	20.1062	22.8711	57.0228
asx1.1_ox1.0.loc.38385	15.6739	52.317	32.0091
asx1.1_ox1.0.loc.16219	28.1607	50.9994	20.8398
asx1.1_ox1.0.loc.16218	28.0544	42.3621	29.5835
asx1.1_ox1.0.loc.13175	8.04009	26.8991	65.0608
asx1.1_ox1.0.loc.16211	29.2297	50.6577	20.1126
asx1.1_ox1.0.loc.22161	38.94	32.7892	28.2708
asx1.1_ox1.0.loc.16212	1.6191	44.858	53.5229
asx1.1_ox1.0.loc.16215	7.28353	48.6433	44.0732
asx1.1_ox1.0.loc.16214	53.7883	39.1474	7.06429
asx1.1_ox1.0.loc.16217	31.5237	52.5205	15.9558
asx1.1_ox1.0.loc.16216	36.8712	52.3932	10.7356
asx1.1_ox1.0.loc.13174	41.8425	36.5216	21.6359
asx1.1_ox1.0.loc.16092	2.85033	34.3861	62.7635
asx1.1_ox1.0.loc.04995	27.6814	63.4834	8.83514
asx1.1_ox1.0.loc.04994	29.1599	59.5994	11.2407
asx1.1_ox1.0.loc.04997	37.1661	56.9045	5.92937
asx1.1_ox1.0.loc.04996	10.1149	45.4194	44.4657
asx1.1_ox1.0.loc.04991	11.6653	43.1388	45.1959
asx1.1_ox1.0.loc.04990	1.52844	23.0973	75.3742
asx1.1_ox1.0.loc.04993	19.3808	52.0876	28.5316
asx1.1_ox1.0.loc.37714	31.4153	55.0841	13.5006
asx1.1_ox1.0.loc.37717	14.8302	35.5775	49.5923
asx1.1_ox1.0.loc.04999	9.18965	75.4073	15.4031
asx1.1_ox1.0.loc.04998	34.7216	59.1325	6.14597
asx1.1_ox1.0.loc.37713	37.4639	23.5253	39.0108
asx1.1_ox1.0.loc.33009	34.6554	58.6913	6.6533
asx1.1_ox1.0.loc.33008	16.275	57.0769	26.6482
asx1.1_ox1.0.loc.33007	24.6267	48.0991	27.2741
asx1.1_ox1.0.loc.33006	28.2072	45.3197	26.4731
asx1.1_ox1.0.loc.33000	19.666	27.6426	52.6914
asx1.1_ox1.0.loc.15746	41.5379	42.2656	16.1965
asx1.1_ox1.0.loc.18115	45.974	46.6389	7.3871
asx1.1_ox1.0.loc.18116	36.9845	52.0101	11.0054
asx1.1_ox1.0.loc.15745	30.0278	42.2723	27.6999
asx1.1_ox1.0.loc.15742	6.2667	23.0071	70.7262
asx1.1_ox1.0.loc.15743	24.7805	59.2307	15.9888
asx1.1_ox1.0.loc.15740	18.1923	64.7158	17.0919
asx1.1_ox1.0.loc.15741	36.7322	52.7708	10.497
asx1.1_ox1.0.loc.18119	53.0034	38.4799	8.51672
asx1.1_ox1.0.loc.15597	66.4199	28.5895	4.99063
asx1.1_ox1.0.loc.23691	26.4452	44.4228	29.132
asx1.1_ox1.0.loc.23690	23.1374	52.7743	24.0883
asx1.1_ox1.0.loc.23692	4.74729	32.2756	62.9771
asx1.1_ox1.0.loc.23695	48.6547	39.3037	12.0415
asx1.1_ox1.0.loc.23697	15.0636	44.1357	40.8007
asx1.1_ox1.0.loc.23696	41.4998	57.0233	1.4769
asx1.1_ox1.0.loc.23343	23.6356	48.2951	28.0693
asx1.1_ox1.0.loc.23342	24.0854	45.8579	30.0567
asx1.1_ox1.0.loc.23341	9.07551	60.8333	30.0911
asx1.1_ox1.0.loc.23340	30.6697	44.3519	24.9784
asx1.1_ox1.0.loc.23347	45.5096	47.6062	6.88424
asx1.1_ox1.0.loc.23346	12.7646	48.1461	39.0893
asx1.1_ox1.0.loc.23345	57.5545	19.7603	22.6853
asx1.1_ox1.0.loc.23344	5.56746	36.635	57.7975
asx1.1_ox1.0.loc.23349	3.58043	11.5872	84.8323
asx1.1_ox1.0.loc.23348	2.84032	22.8957	74.2639
asx1.1_ox1.0.loc.05000	25.3805	39.0937	35.5258
asx1.1_ox1.0.loc.15650	1.64406	5.20265	93.1533
asx1.1_ox1.0.loc.05002	9.74836	12.8023	77.4494
asx1.1_ox1.0.loc.31716	5.10921	17.4879	77.4029
asx1.1_ox1.0.loc.05743	41.5586	41.0386	17.4028
asx1.1_ox1.0.loc.00031	36.0428	37.7316	26.2256
asx1.1_ox1.0.loc.31713	39.5029	38.8794	21.6178
asx1.1_ox1.0.loc.31710	45.6536	49.4618	4.88457
asx1.1_ox1.0.loc.00036	68.0034	23.4895	8.50709
asx1.1_ox1.0.loc.31718	35.3437	31.7312	32.9251
asx1.1_ox1.0.loc.00035	2.95302	7.81875	89.2282
asx1.1_ox1.0.loc.13638	7.56601	65.8468	26.5872
asx1.1_ox1.0.loc.35876	30.7067	42.8557	26.4376
asx1.1_ox1.0.loc.35877	28.482	56.6408	14.8772
asx1.1_ox1.0.loc.35874	23.8991	15.7956	60.3053
asx1.1_ox1.0.loc.35875	29.6781	58.4094	11.9125
asx1.1_ox1.0.loc.35872	17.8487	34.0691	48.0821
asx1.1_ox1.0.loc.35870	21.9034	34.8664	43.2303
asx1.1_ox1.0.loc.05112	27.1581	40.7706	32.0713
asx1.1_ox1.0.loc.05113	38.021	48.1634	13.8156
asx1.1_ox1.0.loc.05110	34.496	53.0238	12.4802
asx1.1_ox1.0.loc.05111	36.0925	38.5801	25.3275
asx1.1_ox1.0.loc.05116	1.03452	27.0543	71.9112
asx1.1_ox1.0.loc.05117	3.01819	36.837	60.1448
asx1.1_ox1.0.loc.05114	2.2105	7.67694	90.1126
asx1.1_ox1.0.loc.05115	3.11463	26.3076	70.5778
asx1.1_ox1.0.loc.08193	31.731	46.7236	21.5454
asx1.1_ox1.0.loc.08194	22.9257	52.6526	24.4216
asx1.1_ox1.0.loc.08197	31.1145	54.3492	14.5363
asx1.1_ox1.0.loc.32064	63.5568	22.7595	13.6837
asx1.1_ox1.0.loc.32065	4.6382	36.1914	59.1704
asx1.1_ox1.0.loc.32066	13.1004	47.4775	39.4221
asx1.1_ox1.0.loc.32067	24.6516	20.7866	54.5618
asx1.1_ox1.0.loc.32060	27.7564	35.6045	36.639
asx1.1_ox1.0.loc.32062	15.507	27.9554	56.5375
asx1.1_ox1.0.loc.32063	14.1428	50.0607	35.7965
asx1.1_ox1.0.loc.32069	15.1412	74.3411	10.5177
asx1.1_ox1.0.loc.28948	12.915	30.6706	56.4144
asx1.1_ox1.0.loc.28949	25.0847	69.9657	4.94952
asx1.1_ox1.0.loc.28944	8.61928	26.9186	64.4621
asx1.1_ox1.0.loc.28947	38.165	38.2652	23.5698
asx1.1_ox1.0.loc.28940	36.0796	60.0493	3.87116
asx1.1_ox1.0.loc.28942	29.3804	58.3454	12.2742
asx1.1_ox1.0.loc.28943	48.4973	44.9268	6.57591
asx1.1_ox1.0.loc.00699	7.04175	53.0283	39.93
asx1.1_ox1.0.loc.00696	8.58317	25.3492	66.0676
asx1.1_ox1.0.loc.00697	44.5324	47.2855	8.18211
asx1.1_ox1.0.loc.00695	26.7341	32.1761	41.0898
asx1.1_ox1.0.loc.00693	5.13211	13.6056	81.2622
asx1.1_ox1.0.loc.00691	13.9877	29.472	56.5402
asx1.1_ox1.0.loc.08443	17.7851	24.2364	57.9785
asx1.1_ox1.0.loc.08442	34.0231	29.5598	36.4171
asx1.1_ox1.0.loc.08441	10.8161	52.6499	36.534
asx1.1_ox1.0.loc.08447	13.9712	48.8301	37.1987
asx1.1_ox1.0.loc.08446	16.0075	49.4006	34.5918
asx1.1_ox1.0.loc.08445	5.15728	25.0685	69.7743
asx1.1_ox1.0.loc.08449	9.58448	57.2599	33.1556
asx1.1_ox1.0.loc.08448	6.01308	30.624	63.3629
asx1.1_ox1.0.loc.15656	40.7558	29.6221	29.6221
asx1.1_ox1.0.loc.01128	4.6268	37.3251	58.0481
asx1.1_ox1.0.loc.01124	26.1348	61.1031	12.7621
asx1.1_ox1.0.loc.01122	17.1817	47.178	35.6404
asx1.1_ox1.0.loc.01121	44.4611	40.9077	14.6312
asx1.1_ox1.0.loc.01120	20.4381	55.9818	23.5801
asx1.1_ox1.0.loc.25341	37.7565	46.6137	15.6298
asx1.1_ox1.0.loc.25340	23.4334	19.3203	57.2463
asx1.1_ox1.0.loc.25343	31.4315	51.6327	16.9358
asx1.1_ox1.0.loc.25342	28.5099	45.1961	26.294
asx1.1_ox1.0.loc.25344	22.4612	55.3338	22.205
asx1.1_ox1.0.loc.33829	20.4759	53.8855	25.6385
asx1.1_ox1.0.loc.33828	3.23808	59.819	36.943
asx1.1_ox1.0.loc.25349	63.0107	32.4643	4.52506
asx1.1_ox1.0.loc.25348	26.328	48.0703	25.6017
asx1.1_ox1.0.loc.33825	5.20427	41.4938	53.302
asx1.1_ox1.0.loc.33824	37.2452	50.3816	12.3732
asx1.1_ox1.0.loc.33823	58.75	33.0993	8.15077
asx1.1_ox1.0.loc.33822	39.0785	45.6809	15.2406
asx1.1_ox1.0.loc.33821	4.73511	36.4846	58.7803
asx1.1_ox1.0.loc.33820	33.1262	54.1419	12.7319
asx1.1_ox1.0.loc.21450	5.19158	8.89072	85.9177
asx1.1_ox1.0.loc.21453	29.0107	30.3465	40.6428
asx1.1_ox1.0.loc.21452	2.18487	72.6762	25.139
asx1.1_ox1.0.loc.21457	31.0189	47.2105	21.7706
asx1.1_ox1.0.loc.21456	77.0367	20.454	2.50929
asx1.1_ox1.0.loc.21458	10.6239	19.6207	69.7553
asx1.1_ox1.0.loc.09310	8.38861	61.109	30.5024
asx1.1_ox1.0.loc.09311	9.9802	60.3579	29.6619
asx1.1_ox1.0.loc.09312	67.7434	23.173	9.08358
asx1.1_ox1.0.loc.09314	27.123	48.445	24.432
asx1.1_ox1.0.loc.09317	53.7148	28.3179	17.9673
asx1.1_ox1.0.loc.09318	14.663	77.4569	7.88019
asx1.1_ox1.0.loc.05800	32.7359	57.6756	9.58849
asx1.1_ox1.0.loc.05801	28.4889	49.0503	22.4608
asx1.1_ox1.0.loc.05803	28.9522	36.8792	34.1686
asx1.1_ox1.0.loc.05804	10.373	35.2086	54.4184
asx1.1_ox1.0.loc.05805	48.0331	37.7754	14.1915
asx1.1_ox1.0.loc.05807	23.996	40.866	35.138
asx1.1_ox1.0.loc.05808	4.73037	23.0347	72.2349
asx1.1_ox1.0.loc.05809	4.653	28.6685	66.6785
asx1.1_ox1.0.loc.07403	22.2533	42.3845	35.3622
asx1.1_ox1.0.loc.07400	36.9311	35.4236	27.6453
asx1.1_ox1.0.loc.07401	40.1566	32.9411	26.9022
asx1.1_ox1.0.loc.07406	58.4138	34.7577	6.82849
asx1.1_ox1.0.loc.07407	14.5793	40.3579	45.0628
asx1.1_ox1.0.loc.07404	18.3164	61.0681	20.6155
asx1.1_ox1.0.loc.07405	19.3935	55.9819	24.6246
asx1.1_ox1.0.loc.26107	51.7589	39.8745	8.36655
asx1.1_ox1.0.loc.26104	25.6513	63.574	10.7747
asx1.1_ox1.0.loc.26102	8.94241	70.3578	20.6998
asx1.1_ox1.0.loc.26100	7.08332	35.3727	57.5439
asx1.1_ox1.0.loc.26101	26.6133	41.6767	31.71
asx1.1_ox1.0.loc.12969	43.7827	44.9009	11.3164
asx1.1_ox1.0.loc.12968	35.3048	49.6073	15.0879
asx1.1_ox1.0.loc.12962	47.6803	23.8401	28.4796
asx1.1_ox1.0.loc.12960	32.4595	33.7702	33.7702
asx1.1_ox1.0.loc.12967	34.849	35.4621	29.6889
asx1.1_ox1.0.loc.12966	38.0465	36.9047	25.0488
asx1.1_ox1.0.loc.12965	47.8942	38.9949	13.1109
asx1.1_ox1.0.loc.12964	19.7996	33.0825	47.1178
asx1.1_ox1.0.loc.27859	43.2298	49.9661	6.80414
asx1.1_ox1.0.loc.27858	5.31111	36.6768	58.0121
asx1.1_ox1.0.loc.27852	17.3593	45.9716	36.6691
asx1.1_ox1.0.loc.27851	18.2749	41.9048	39.8203
asx1.1_ox1.0.loc.27850	22.9577	21.0846	55.9577
asx1.1_ox1.0.loc.27855	9.49274	47.9583	42.5489
asx1.1_ox1.0.loc.12124	2.23035	33.0346	64.735
asx1.1_ox1.0.loc.03738	20.1924	50.9276	28.88
asx1.1_ox1.0.loc.03739	6.85517	29.962	63.1828
asx1.1_ox1.0.loc.11432	16.9346	50.568	32.4974
asx1.1_ox1.0.loc.11434	9.91611	31.0267	59.0572
asx1.1_ox1.0.loc.11437	34.1343	40.109	25.7567
asx1.1_ox1.0.loc.29313	11.1897	11.1897	77.6205
asx1.1_ox1.0.loc.17872	30.9178	33.4068	35.6754
asx1.1_ox1.0.loc.17871	28.9084	47.7445	23.3471
asx1.1_ox1.0.loc.17876	8.32771	19.586	72.0863
asx1.1_ox1.0.loc.17877	7.48496	14.4272	78.0879
asx1.1_ox1.0.loc.17874	44.9915	46.451	8.55745
asx1.1_ox1.0.loc.17875	28.4601	50.4762	21.0637
asx1.1_ox1.0.loc.17879	5.40944	68.9998	25.5908
asx1.1_ox1.0.loc.19343	26.752	30.3111	42.9369
asx1.1_ox1.0.loc.10473	5.2668	28.0143	66.7189
asx1.1_ox1.0.loc.10471	21.1478	70.1546	8.69758
asx1.1_ox1.0.loc.10477	28.6047	32.6972	38.6981
asx1.1_ox1.0.loc.10475	29.6135	49.9164	20.4702
asx1.1_ox1.0.loc.10474	27.7744	38.5103	33.7153
asx1.1_ox1.0.loc.10479	28.444	48.6093	22.9466
asx1.1_ox1.0.loc.10478	34.4425	47.5636	17.9939
asx1.1_ox1.0.loc.20199	11.118	33.312	55.5699
asx1.1_ox1.0.loc.20198	18.6864	9.34321	71.9704
asx1.1_ox1.0.loc.20194	30.0692	28.4076	41.5232
asx1.1_ox1.0.loc.20193	24.2413	28.8691	46.8897
asx1.1_ox1.0.loc.20192	14.9141	73.0792	12.0066
asx1.1_ox1.0.loc.20191	10.1407	63.5783	26.281
asx1.1_ox1.0.loc.26936	28.9285	54.3235	16.748
asx1.1_ox1.0.loc.26935	30.2081	63.0378	6.75405
asx1.1_ox1.0.loc.26932	18.03	69.004	12.9661
asx1.1_ox1.0.loc.26930	19.4242	51.5187	29.0571
asx1.1_ox1.0.loc.17297	1.78985	53.188	45.0221
asx1.1_ox1.0.loc.17292	43.4451	43.9911	12.5637
asx1.1_ox1.0.loc.17293	41.764	47.7432	10.4928
asx1.1_ox1.0.loc.17290	31.9268	51.9207	16.1524
asx1.1_ox1.0.loc.17291	27.1158	49.3522	23.532
asx1.1_ox1.0.loc.17298	17.446	60.5981	21.9559
asx1.1_ox1.0.loc.17299	40.3938	49.8429	9.76333
asx1.1_ox1.0.loc.08559	4.28942	5.21577	90.4948
asx1.1_ox1.0.loc.20441	42.1051	56.2055	1.68942
asx1.1_ox1.0.loc.20440	16.5115	38.2493	45.2392
asx1.1_ox1.0.loc.20443	30.5662	60.0563	9.37755
asx1.1_ox1.0.loc.20442	25.707	47.9427	26.3503
asx1.1_ox1.0.loc.20445	27.8165	34.7598	37.4237
asx1.1_ox1.0.loc.20444	44.0969	48.1361	7.76707
asx1.1_ox1.0.loc.20447	38.7257	49.2726	12.0016
asx1.1_ox1.0.loc.20446	27.293	50.6479	22.0591
asx1.1_ox1.0.loc.17120	2.13391	7.17804	90.6881
asx1.1_ox1.0.loc.17121	50.9356	38.6102	10.4541
asx1.1_ox1.0.loc.17123	60.1402	30.0819	9.77788
asx1.1_ox1.0.loc.17124	9.45655	35.0056	55.5379
asx1.1_ox1.0.loc.17125	7.86349	40.4174	51.7191
asx1.1_ox1.0.loc.17126	12.2535	37.3444	50.4021
asx1.1_ox1.0.loc.08550	35.9137	44.7354	19.3509
asx1.1_ox1.0.loc.16457	16.0122	50.8237	33.1642
asx1.1_ox1.0.loc.16456	45.1246	42.3585	12.5169
asx1.1_ox1.0.loc.16455	64.8095	30.616	4.57449
asx1.1_ox1.0.loc.16454	48.3486	34.9217	16.7297
asx1.1_ox1.0.loc.16453	45.8527	35.297	18.8504
asx1.1_ox1.0.loc.03779	34.8178	56.0505	9.13172
asx1.1_ox1.0.loc.16450	10.4796	7.06944	82.451
asx1.1_ox1.0.loc.03774	28.8488	55.5429	15.6083
asx1.1_ox1.0.loc.03776	30.7668	48.1625	21.0707
asx1.1_ox1.0.loc.03777	8.7011	34.9142	56.3847
asx1.1_ox1.0.loc.03770	21.9922	58.7943	19.2134
asx1.1_ox1.0.loc.16459	33.9294	48.6236	17.4471
asx1.1_ox1.0.loc.12512	4.30065	47.0561	48.6433
asx1.1_ox1.0.loc.12513	39.2185	49.7545	11.0269
asx1.1_ox1.0.loc.12510	4.14515	42.7426	53.1122
asx1.1_ox1.0.loc.12511	0.807912	25.9936	73.1985
asx1.1_ox1.0.loc.12517	34.1784	50.205	15.6166
asx1.1_ox1.0.loc.12518	18.4919	62.4337	19.0745
asx1.1_ox1.0.loc.12519	32.8689	57.1636	9.96746
asx1.1_ox1.0.loc.21716	37.4528	45.3924	17.1549
asx1.1_ox1.0.loc.21714	29.9807	37.7174	32.3019
asx1.1_ox1.0.loc.21715	35.879	50.0895	14.0315
asx1.1_ox1.0.loc.21712	1.44011	13.0723	85.4875
asx1.1_ox1.0.loc.21713	18.4577	32.221	49.3213
asx1.1_ox1.0.loc.21710	38.7106	56.5714	4.71796
asx1.1_ox1.0.loc.21711	9.35294	26.0424	64.6047
asx1.1_ox1.0.loc.21718	46.9171	31.8561	21.2269
asx1.1_ox1.0.loc.21719	47.0116	28.3868	24.6016
asx1.1_ox1.0.loc.16981	42.9076	50.3076	6.78478
asx1.1_ox1.0.loc.16980	39.7524	41.6369	18.6106
asx1.1_ox1.0.loc.16983	37.3581	51.2425	11.3995
asx1.1_ox1.0.loc.16985	13.7977	12.9562	73.2461
asx1.1_ox1.0.loc.16984	22.8478	40.9827	36.1695
asx1.1_ox1.0.loc.16987	11.8703	34.2057	53.924
asx1.1_ox1.0.loc.16986	17.7068	61.1055	21.1877
asx1.1_ox1.0.loc.16989	59.1081	38.3868	2.50509
asx1.1_ox1.0.loc.15184	24.1139	47.798	28.0881
asx1.1_ox1.0.loc.15185	14.1644	72.2082	13.6274
asx1.1_ox1.0.loc.15186	18.7782	52.7289	28.4929
asx1.1_ox1.0.loc.15187	10.2336	84.6109	5.15558
asx1.1_ox1.0.loc.15180	56.4451	39.654	3.9009
asx1.1_ox1.0.loc.15181	21.9508	59.5923	18.4569
asx1.1_ox1.0.loc.15183	26.2458	64.1049	9.64933
asx1.1_ox1.0.loc.04204	71.8186	14.0907	14.0907
asx1.1_ox1.0.loc.04207	63.6429	30.6111	5.74601
asx1.1_ox1.0.loc.04206	38.4346	60.0125	1.55284
asx1.1_ox1.0.loc.04201	19.7484	31.4729	48.7788
asx1.1_ox1.0.loc.04200	19.9115	30.9879	49.1006
asx1.1_ox1.0.loc.04202	25.0997	48.6881	26.2122
asx1.1_ox1.0.loc.14589	7.42545	37.6391	54.9355
asx1.1_ox1.0.loc.14588	10.8406	64.5149	24.6444
asx1.1_ox1.0.loc.14583	33.7183	45.6412	20.6405
asx1.1_ox1.0.loc.14580	36.6592	19.887	43.4538
asx1.1_ox1.0.loc.14586	38.1743	52.3142	9.51154
asx1.1_ox1.0.loc.14585	28.3266	53.7976	17.8758
asx1.1_ox1.0.loc.14584	32.1643	44.8673	22.9685
asx1.1_ox1.0.loc.10809	24.8818	22.2488	52.8694
asx1.1_ox1.0.loc.10802	3.58275	50.5078	45.9095
asx1.1_ox1.0.loc.10803	7.14451	52.3953	40.4602
asx1.1_ox1.0.loc.10800	3.12976	23.5546	73.3157
asx1.1_ox1.0.loc.10806	2.77593	59.7011	37.523
asx1.1_ox1.0.loc.10807	35.8601	25.5886	38.5514
asx1.1_ox1.0.loc.10804	29.3921	49.6256	20.9823
asx1.1_ox1.0.loc.00458	44.0777	53.4638	2.4585
asx1.1_ox1.0.loc.00459	35.2431	48.2607	16.4962
asx1.1_ox1.0.loc.00454	24.3293	41.0912	34.5795
asx1.1_ox1.0.loc.00455	19.5001	60.1258	20.3742
asx1.1_ox1.0.loc.00456	36.3085	49.3858	14.3057
asx1.1_ox1.0.loc.00457	16.8209	67.3112	15.8679
asx1.1_ox1.0.loc.00451	13.7817	63.5334	22.685
asx1.1_ox1.0.loc.00452	47.8018	44.8147	7.38356
asx1.1_ox1.0.loc.00453	48.7529	46.5372	4.70989
asx1.1_ox1.0.loc.37264	45.7008	48.5521	5.7471
asx1.1_ox1.0.loc.37267	44.0736	30.0868	25.8396
asx1.1_ox1.0.loc.22369	25.9727	42.6445	31.3828
asx1.1_ox1.0.loc.01329	19.8291	36.4886	43.6823
asx1.1_ox1.0.loc.01328	6.78585	34.255	58.9592
asx1.1_ox1.0.loc.06113	35.686	35.3768	28.9372
asx1.1_ox1.0.loc.06112	5.55715	34.2006	60.2422
asx1.1_ox1.0.loc.06111	34.3342	51.0565	14.6092
asx1.1_ox1.0.loc.06110	21.1678	37.4894	41.3428
asx1.1_ox1.0.loc.06117	22.9724	48.3169	28.7106
asx1.1_ox1.0.loc.06116	33.3771	56.5487	10.0742
asx1.1_ox1.0.loc.06115	44.308	27.2469	28.4451
asx1.1_ox1.0.loc.06114	43.1485	45.2558	11.5958
asx1.1_ox1.0.loc.37263	21.8908	13.0577	65.0515
asx1.1_ox1.0.loc.37269	28.8983	61.1274	9.9743
asx1.1_ox1.0.loc.37268	42.2057	47.0705	10.7238
asx1.1_ox1.0.loc.21949	0.396111	6.02414	93.5798
asx1.1_ox1.0.loc.07248	3.54539	25.2821	71.1725
asx1.1_ox1.0.loc.07242	2.33625	31.8777	65.7861
asx1.1_ox1.0.loc.07243	6.43871	36.3031	57.2582
asx1.1_ox1.0.loc.07244	10.9622	40.382	48.6558
asx1.1_ox1.0.loc.07245	2.95404	22.7579	74.288
asx1.1_ox1.0.loc.07246	4.07997	8.92842	86.9916
asx1.1_ox1.0.loc.07247	26.7265	57.7596	15.5139
asx1.1_ox1.0.loc.33597	25.0315	65.9067	9.06176
asx1.1_ox1.0.loc.33596	49.0778	35.7147	15.2075
asx1.1_ox1.0.loc.33595	30.4529	42.7021	26.8449
asx1.1_ox1.0.loc.28431	33.6614	45.4675	20.8712
asx1.1_ox1.0.loc.22547	11.0887	65.0896	23.8217
asx1.1_ox1.0.loc.28435	41.3247	38.3021	20.3732
asx1.1_ox1.0.loc.33599	40.9227	50.9842	8.09307
asx1.1_ox1.0.loc.33598	28.792	55.788	15.42
asx1.1_ox1.0.loc.15975	23.3924	47.0874	29.5202
asx1.1_ox1.0.loc.15974	34.3333	39.4462	26.2206
asx1.1_ox1.0.loc.15977	37.6969	42.6716	19.6314
asx1.1_ox1.0.loc.15971	61.1747	26.739	12.0863
asx1.1_ox1.0.loc.15970	41.6048	32.4814	25.9138
asx1.1_ox1.0.loc.15973	46.1509	34.7409	19.1082
asx1.1_ox1.0.loc.15972	53.6505	30.3246	16.0249
asx1.1_ox1.0.loc.15979	21.4968	42.6286	35.8747
asx1.1_ox1.0.loc.15978	29.581	51.4044	19.0146
asx1.1_ox1.0.loc.02144	25.5185	44.7452	29.7363
asx1.1_ox1.0.loc.02145	45.4608	49.5934	4.94587
asx1.1_ox1.0.loc.02147	19.5623	51.7887	28.649
asx1.1_ox1.0.loc.02140	43.1162	49.1143	7.76945
asx1.1_ox1.0.loc.02141	22.133	41.8096	36.0573
asx1.1_ox1.0.loc.02142	43.6964	49.5892	6.71443
asx1.1_ox1.0.loc.02148	39.1894	49.1173	11.6932
asx1.1_ox1.0.loc.02149	42.9181	50.7096	6.37224
asx1.1_ox1.0.loc.28054	5.10932	47.4455	47.4452
asx1.1_ox1.0.loc.03890	12.2415	57.6734	30.0851
asx1.1_ox1.0.loc.03893	8.41734	82.2046	9.37804
asx1.1_ox1.0.loc.03892	40.2057	51.5299	8.2644
asx1.1_ox1.0.loc.03895	14.8942	68.8645	16.2413
asx1.1_ox1.0.loc.03894	16.1289	70.5909	13.2802
asx1.1_ox1.0.loc.03899	15.386	63.7055	20.9085
asx1.1_ox1.0.loc.03898	40.8916	53.1253	5.98311
asx1.1_ox1.0.loc.32644	6.56936	13.0167	80.414
asx1.1_ox1.0.loc.32645	84.3188	14.9391	0.742076
asx1.1_ox1.0.loc.32646	36.8192	50.0141	13.1667
asx1.1_ox1.0.loc.32640	21.6404	18.2839	60.0757
asx1.1_ox1.0.loc.32641	2.8112	1.0933	96.0955
asx1.1_ox1.0.loc.32642	48.0107	47.1716	4.81768
asx1.1_ox1.0.loc.32648	31.0241	48.756	20.2199
asx1.1_ox1.0.loc.32649	14.5177	73.9063	11.576
asx1.1_ox1.0.loc.37038	20.4094	38.7966	40.794
asx1.1_ox1.0.loc.38028	49.0859	43.8844	7.02969
asx1.1_ox1.0.loc.38026	22.0068	51.1903	26.8029
asx1.1_ox1.0.loc.37036	26.2901	40.1119	33.598
asx1.1_ox1.0.loc.37037	33.7641	56.5216	9.71435
asx1.1_ox1.0.loc.38022	24.5776	49.8843	25.5382
asx1.1_ox1.0.loc.38023	26.8418	46.6194	26.5388
asx1.1_ox1.0.loc.38020	60.5166	29.2259	10.2575
asx1.1_ox1.0.loc.38021	4.98326	80.3059	14.7109
asx1.1_ox1.0.loc.03235	31.6918	49.2286	19.0796
asx1.1_ox1.0.loc.08221	11.8991	29.4356	58.6653
asx1.1_ox1.0.loc.08220	18.3924	41.5534	40.0542
asx1.1_ox1.0.loc.03231	19.3887	43.6294	36.9819
asx1.1_ox1.0.loc.03230	0.597849	2.41243	96.9897
asx1.1_ox1.0.loc.08225	36.4298	38.3198	25.2503
asx1.1_ox1.0.loc.08224	36.5241	29.9291	33.5468
asx1.1_ox1.0.loc.12651	16.9152	17.6065	65.4783
asx1.1_ox1.0.loc.03239	38.1509	44.6667	17.1824
asx1.1_ox1.0.loc.03238	29.3593	48.4527	22.188
asx1.1_ox1.0.loc.29473	19.8469	47.2208	32.9323
asx1.1_ox1.0.loc.29472	25.6376	43.0047	31.3576
asx1.1_ox1.0.loc.29471	50.4445	46.3399	3.21559
asx1.1_ox1.0.loc.29470	11.9103	19.228	68.8617
asx1.1_ox1.0.loc.29477	19.8015	66.2211	13.9774
asx1.1_ox1.0.loc.36348	15.5435	44.9796	39.4769
asx1.1_ox1.0.loc.29475	21.5601	59.9072	18.5328
asx1.1_ox1.0.loc.29474	14.7956	4.23841	80.966
asx1.1_ox1.0.loc.36344	34.8777	48.7462	16.3761
asx1.1_ox1.0.loc.29479	24.1595	38.527	37.3136
asx1.1_ox1.0.loc.29478	42.4431	44.2969	13.26
asx1.1_ox1.0.loc.36341	16.059	24.5547	59.3863
asx1.1_ox1.0.loc.36340	32.3431	39.255	28.4019
asx1.1_ox1.0.loc.36343	34.8938	56.8091	8.29708
asx1.1_ox1.0.loc.36342	6.26318	88.4858	5.25097
asx1.1_ox1.0.loc.12650	14.9083	72.4965	12.5952
asx1.1_ox1.0.loc.19475	35.3803	54.9771	9.64267
asx1.1_ox1.0.loc.19477	3.45854	71.8592	24.6823
asx1.1_ox1.0.loc.19470	23.1666	51.7902	25.0433
asx1.1_ox1.0.loc.19472	43.5137	49.5056	6.98068
asx1.1_ox1.0.loc.19473	45.8595	46.5543	7.58623
asx1.1_ox1.0.loc.31235	7.98445	31.2012	60.8144
asx1.1_ox1.0.loc.29903	9.63353	71.5595	18.807
asx1.1_ox1.0.loc.12652	7.44627	58.065	34.4887
asx1.1_ox1.0.loc.37690	41.5991	29.8309	28.57
asx1.1_ox1.0.loc.22738	17.7111	57.447	24.8419
asx1.1_ox1.0.loc.37692	10.729	52.7624	36.5086
asx1.1_ox1.0.loc.37693	19.0373	43.8173	37.1454
asx1.1_ox1.0.loc.37696	26.3014	54.4212	19.2774
asx1.1_ox1.0.loc.37697	8.138	22.6751	69.1869
asx1.1_ox1.0.loc.37698	31.9082	31.509	36.5828
asx1.1_ox1.0.loc.22730	20.7756	41.997	37.2274
asx1.1_ox1.0.loc.22733	7.8814	16.0132	76.1054
asx1.1_ox1.0.loc.22732	4.58833	38.0924	57.3193
asx1.1_ox1.0.loc.22734	9.65557	17.5661	72.7783
asx1.1_ox1.0.loc.22737	14.911	62.3016	22.7875
asx1.1_ox1.0.loc.22736	52.3216	41.3722	6.30621
asx1.1_ox1.0.loc.31698	32.1774	47.5083	20.3143
asx1.1_ox1.0.loc.31699	29.8316	52.4564	17.712
asx1.1_ox1.0.loc.31692	10.3869	51.8231	37.79
asx1.1_ox1.0.loc.10154	22.9334	57.9178	19.1488
asx1.1_ox1.0.loc.31696	29.1093	56.0544	14.8363
asx1.1_ox1.0.loc.31697	61.3597	37.5695	1.07075
asx1.1_ox1.0.loc.31694	28.8111	64.1879	7.00097
asx1.1_ox1.0.loc.25960	31.7561	50.0557	18.1881
asx1.1_ox1.0.loc.25963	26.0097	43.0913	30.899
asx1.1_ox1.0.loc.25387	17.3063	31.5706	51.1231
asx1.1_ox1.0.loc.25967	38.6079	51.0347	10.3573
asx1.1_ox1.0.loc.25966	55.797	43.5405	0.66252
asx1.1_ox1.0.loc.25969	31.2263	48.2025	20.5712
asx1.1_ox1.0.loc.25968	4.67927	57.3642	37.9565
asx1.1_ox1.0.loc.33278	25.4554	52.288	22.2565
asx1.1_ox1.0.loc.33279	27.0723	35.541	37.3868
asx1.1_ox1.0.loc.33272	46.0388	37.0892	16.872
asx1.1_ox1.0.loc.33270	16.6776	37.6567	45.6657
asx1.1_ox1.0.loc.33276	19.3202	46.4522	34.2276
asx1.1_ox1.0.loc.33274	45.7871	37.086	17.1268
asx1.1_ox1.0.loc.33275	29.3665	11.0209	59.6126
asx1.1_ox1.0.loc.09570	24.4879	38.6273	36.8848
asx1.1_ox1.0.loc.09571	24.6098	30.4689	44.9213
asx1.1_ox1.0.loc.37968	57.5784	34.2153	8.20633
asx1.1_ox1.0.loc.09574	7.52513	32.5657	59.9092
asx1.1_ox1.0.loc.09575	30.4105	56.5338	13.0557
asx1.1_ox1.0.loc.09576	36.7355	39.9966	23.2679
asx1.1_ox1.0.loc.09577	29.2451	56.1516	14.6033
asx1.1_ox1.0.loc.37962	10.5127	46.1113	43.376
asx1.1_ox1.0.loc.37963	26.3109	64.7803	8.90871
asx1.1_ox1.0.loc.37960	40.5067	43.3728	16.1204
asx1.1_ox1.0.loc.37964	26.969	51.8066	21.2245
asx1.1_ox1.0.loc.37965	19.9742	45.9999	34.0259
asx1.1_ox1.0.loc.31524	9.50878	67.8929	22.5983
asx1.1_ox1.0.loc.31527	53.0917	11.0152	35.8932
asx1.1_ox1.0.loc.31523	49.0289	36.1485	14.8226
asx1.1_ox1.0.loc.31529	6.50626	44.9399	48.5539
asx1.1_ox1.0.loc.23067	73.4216	25.4288	1.14965
asx1.1_ox1.0.loc.23065	70.2963	28.0996	1.6041
asx1.1_ox1.0.loc.23062	47.2035	43.6714	9.12515
asx1.1_ox1.0.loc.18700	35.5059	54.4553	10.0388
asx1.1_ox1.0.loc.18703	10.3701	63.5141	26.1159
asx1.1_ox1.0.loc.23061	40.2164	35.2844	24.4992
asx1.1_ox1.0.loc.18709	47.723	43.9406	8.3364
asx1.1_ox1.0.loc.18708	26.6813	46.9034	26.4152
asx1.1_ox1.0.loc.23068	78.2778	17.8345	3.88765
asx1.1_ox1.0.loc.23069	36.3563	23.5797	40.064
asx1.1_ox1.0.loc.05303	30.3109	46.569	23.1201
asx1.1_ox1.0.loc.00154	25.5841	25.4893	48.9266
asx1.1_ox1.0.loc.00157	83.7758	14.7136	1.51069
asx1.1_ox1.0.loc.05300	28.5961	40.4251	30.9788
asx1.1_ox1.0.loc.00151	24.5344	58.5374	16.9282
asx1.1_ox1.0.loc.00153	6.94561	46.4527	46.6017
asx1.1_ox1.0.loc.05304	35.7384	54.5406	9.72097
asx1.1_ox1.0.loc.05309	30.9605	40.391	28.6486
asx1.1_ox1.0.loc.00159	30.2406	44.1772	25.5821
asx1.1_ox1.0.loc.00158	20.3801	13.0515	66.5684
asx1.1_ox1.0.loc.24777	19.6556	50.5866	29.7578
asx1.1_ox1.0.loc.24774	21.4773	51.739	26.7837
asx1.1_ox1.0.loc.24772	11.895	43.1486	44.9564
asx1.1_ox1.0.loc.24770	33.7188	37.028	29.2532
asx1.1_ox1.0.loc.24778	14.5457	64.4252	21.0291
asx1.1_ox1.0.loc.20607	29.5386	39.0382	31.4232
asx1.1_ox1.0.loc.20605	37.2179	56.623	6.1591
asx1.1_ox1.0.loc.20604	49.8965	45.7283	4.37523
asx1.1_ox1.0.loc.20602	3.17474	28.8799	67.9453
asx1.1_ox1.0.loc.20601	37.1607	51.3299	11.5094
asx1.1_ox1.0.loc.38621	25.8743	45.5359	28.5897
asx1.1_ox1.0.loc.04834	25.9605	51.1406	22.8988
asx1.1_ox1.0.loc.20609	3.85148	10.4422	85.7064
asx1.1_ox1.0.loc.20608	45.5156	40.1501	14.3343
asx1.1_ox1.0.loc.08767	0.772626	4.55887	94.6685
asx1.1_ox1.0.loc.08763	65.9328	31.3937	2.67354
asx1.1_ox1.0.loc.08761	25.5469	52.6725	21.7807
asx1.1_ox1.0.loc.38624	7.0207	26.7928	66.1865
asx1.1_ox1.0.loc.08768	23.1979	49.5385	27.2636
asx1.1_ox1.0.loc.08769	27.6241	58.3075	14.0684
asx1.1_ox1.0.loc.09803	32.2004	39.8552	27.9445
asx1.1_ox1.0.loc.06652	30.9606	34.5197	34.5197
asx1.1_ox1.0.loc.06654	18.4577	49.3566	32.1857
asx1.1_ox1.0.loc.06655	19.0605	36.623	44.3165
asx1.1_ox1.0.loc.06656	15.5332	42.2533	42.2135
asx1.1_ox1.0.loc.06657	18.726	48.8908	32.3832
asx1.1_ox1.0.loc.06658	17.6148	58.0489	24.3363
asx1.1_ox1.0.loc.06659	32.2708	46.5655	21.1637
asx1.1_ox1.0.loc.14045	27.7856	55.9285	16.2859
asx1.1_ox1.0.loc.13911	11.0175	24.6811	64.3014
asx1.1_ox1.0.loc.13913	58.3554	34.8293	6.81529
asx1.1_ox1.0.loc.13912	21.4444	55.4304	23.1252
asx1.1_ox1.0.loc.13914	18.1257	31.5949	50.2794
asx1.1_ox1.0.loc.13917	25.2851	53.7597	20.9553
asx1.1_ox1.0.loc.13916	27.3025	43.7015	28.996
asx1.1_ox1.0.loc.13919	20.8003	23.8894	55.3103
asx1.1_ox1.0.loc.13918	73.0787	24.9878	1.93345
asx1.1_ox1.0.loc.26600	5.94861	9.75277	84.2986
asx1.1_ox1.0.loc.26603	27.834	14.1545	58.0114
asx1.1_ox1.0.loc.26602	11.1765	18.4146	70.4089
asx1.1_ox1.0.loc.26605	28.4209	54.7482	16.8309
asx1.1_ox1.0.loc.26604	8.7449	12.8792	78.3759
asx1.1_ox1.0.loc.26607	1.72577	45.0595	53.2147
asx1.1_ox1.0.loc.26606	22.6593	59.8377	17.503
asx1.1_ox1.0.loc.26609	18.5732	28.5524	52.8744
asx1.1_ox1.0.loc.26608	31.0041	53.7835	15.2124
asx1.1_ox1.0.loc.27958	7.19967	38.5177	54.2826
asx1.1_ox1.0.loc.27956	24.5684	58.1513	17.2803
asx1.1_ox1.0.loc.27955	34.539	51.203	14.258
asx1.1_ox1.0.loc.27953	18.0605	74.7797	7.15982
asx1.1_ox1.0.loc.27950	13.5245	62.846	23.6296
asx1.1_ox1.0.loc.27951	30.9556	50.1729	18.8715
asx1.1_ox1.0.loc.10846	22.2737	26.1281	51.5981
asx1.1_ox1.0.loc.29808	11.7066	42.8666	45.4268
asx1.1_ox1.0.loc.29809	19.1721	56.859	23.9689
asx1.1_ox1.0.loc.29802	22.7561	53.9877	23.2562
asx1.1_ox1.0.loc.29803	21.3787	47.3026	31.3187
asx1.1_ox1.0.loc.29800	10.1305	58.5713	31.2982
asx1.1_ox1.0.loc.29801	35.9771	35.8287	28.1942
asx1.1_ox1.0.loc.37133	0.554695	23.659	75.7863
asx1.1_ox1.0.loc.35774	81.6823	18.1096	0.208057
asx1.1_ox1.0.loc.15907	41.3318	53.0171	5.6511
asx1.1_ox1.0.loc.10849	5.57154	63.4489	30.9795
asx1.1_ox1.0.loc.15901	46.2374	28.2732	25.4894
asx1.1_ox1.0.loc.35773	26.9257	54.0156	19.0587
asx1.1_ox1.0.loc.12655	32.6162	52.0658	15.318
asx1.1_ox1.0.loc.04789	29.3865	55.5989	15.0146
asx1.1_ox1.0.loc.23730	24.6495	44.1277	31.2228
asx1.1_ox1.0.loc.15600	29.2118	13.0413	57.7469
asx1.1_ox1.0.loc.23736	40.9683	48.7699	10.2618
asx1.1_ox1.0.loc.15606	45.0333	40.9669	13.9999
asx1.1_ox1.0.loc.15605	7.31017	32.7841	59.9058
asx1.1_ox1.0.loc.15604	38.075	49.7828	12.1422
asx1.1_ox1.0.loc.18279	1.29067	12.0856	86.6238
asx1.1_ox1.0.loc.18278	19.2681	62.8563	17.8755
asx1.1_ox1.0.loc.04782	36.6908	58.3521	4.95714
asx1.1_ox1.0.loc.04784	38.3152	52.5261	9.15869
asx1.1_ox1.0.loc.10396	25.3448	49.3107	25.3445
asx1.1_ox1.0.loc.10394	20.113	24.4608	55.4262
asx1.1_ox1.0.loc.10395	21.6062	57.304	21.0898
asx1.1_ox1.0.loc.10398	6.86746	10.3483	82.7843
asx1.1_ox1.0.loc.10399	54.2818	40.5706	5.14761
asx1.1_ox1.0.loc.11669	24.4333	54.3622	21.2045
asx1.1_ox1.0.loc.11668	26.8802	61.6393	11.4805
asx1.1_ox1.0.loc.11661	35.2468	40.6662	24.087
asx1.1_ox1.0.loc.11662	23.235	37.0843	39.6807
asx1.1_ox1.0.loc.11665	11.119	7.46831	81.4127
asx1.1_ox1.0.loc.11664	30.7595	49.1653	20.0752
asx1.1_ox1.0.loc.11667	38.6882	47.0784	14.2334
asx1.1_ox1.0.loc.11666	42.7018	29.5403	27.7579
asx1.1_ox1.0.loc.17623	27.3428	44.4122	28.2451
asx1.1_ox1.0.loc.17620	27.7736	41.7208	30.5056
asx1.1_ox1.0.loc.17627	9.78125	37.5582	52.6605
asx1.1_ox1.0.loc.17625	40.0791	46.7062	13.2148
asx1.1_ox1.0.loc.17624	29.3403	48.3565	22.3032
asx1.1_ox1.0.loc.17629	30.3399	52.1412	17.5189
asx1.1_ox1.0.loc.17628	33.2824	61.7843	4.93339
asx1.1_ox1.0.loc.34127	6.72459	31.2531	62.0224
asx1.1_ox1.0.loc.34126	17.7286	58.6364	23.635
asx1.1_ox1.0.loc.34125	5.1877	71.3854	23.4269
asx1.1_ox1.0.loc.34123	11.7442	21.5814	66.6744
asx1.1_ox1.0.loc.34122	10.5223	34.04	55.4377
asx1.1_ox1.0.loc.34121	51.5446	43.5147	4.9407
asx1.1_ox1.0.loc.34128	45.021	53.5857	1.39329
asx1.1_ox1.0.loc.10536	47.3901	44.5533	8.05664
asx1.1_ox1.0.loc.10533	38.9409	49.2274	11.8317
asx1.1_ox1.0.loc.10530	41.2967	41.785	16.9183
asx1.1_ox1.0.loc.10538	3.74986	23.0741	73.176
asx1.1_ox1.0.loc.10539	2.67721	42.9828	54.3399
asx1.1_ox1.0.loc.02303	11.6922	62.4322	25.8755
asx1.1_ox1.0.loc.02300	24.2617	48.3722	27.3661
asx1.1_ox1.0.loc.02301	39.0973	27.713	33.1897
asx1.1_ox1.0.loc.02307	9.74645	21.5513	68.7022
asx1.1_ox1.0.loc.02305	3.52753	5.89121	90.5813
asx1.1_ox1.0.loc.02308	19.7204	79.1937	1.08598
asx1.1_ox1.0.loc.02309	52.5663	41.7512	5.68252
asx1.1_ox1.0.loc.23082	12.2601	32.6984	55.0416
asx1.1_ox1.0.loc.23083	43.8837	40.9761	15.1402
asx1.1_ox1.0.loc.15571	27.7722	48.9985	23.2293
asx1.1_ox1.0.loc.15570	20.3484	60.4087	19.2429
asx1.1_ox1.0.loc.15573	28.0344	54.3076	17.658
asx1.1_ox1.0.loc.15572	39.1574	54.6838	6.15883
asx1.1_ox1.0.loc.12707	24.6916	50.2293	25.0791
asx1.1_ox1.0.loc.12706	32.1255	46.3314	21.5431
asx1.1_ox1.0.loc.12705	43.5913	45.0366	11.3721
asx1.1_ox1.0.loc.15576	32.5989	51.9183	15.4828
asx1.1_ox1.0.loc.15579	12.9079	37.1229	49.9692
asx1.1_ox1.0.loc.15578	34.2005	47.9296	17.8698
asx1.1_ox1.0.loc.12709	29.5876	41.3578	29.0547
asx1.1_ox1.0.loc.12708	13.6913	32.7117	53.597
asx1.1_ox1.0.loc.14628	34.173	29.2192	36.6079
asx1.1_ox1.0.loc.14629	7.06777	25.3363	67.5959
asx1.1_ox1.0.loc.14626	19.2999	27.1554	53.5447
asx1.1_ox1.0.loc.14627	21.719	30.0347	48.2464
asx1.1_ox1.0.loc.14624	24.9427	38.8392	36.2181
asx1.1_ox1.0.loc.14625	25.4806	49.7643	24.7551
asx1.1_ox1.0.loc.14622	36.0577	37.6326	26.3096
asx1.1_ox1.0.loc.14620	28.0359	50.9337	21.0304
asx1.1_ox1.0.loc.14621	3.30999	31.6197	65.0703
asx1.1_ox1.0.loc.32698	21.3059	30.065	48.6291
asx1.1_ox1.0.loc.03439	21.4982	60.8881	17.6137
asx1.1_ox1.0.loc.03438	40.2098	34.6595	25.1307
asx1.1_ox1.0.loc.31322	21.8798	66.7966	11.3236
asx1.1_ox1.0.loc.31320	30.5592	48.4849	20.9559
asx1.1_ox1.0.loc.31326	28.5465	35.6903	35.7632
asx1.1_ox1.0.loc.31324	14.1945	30.9801	54.8254
asx1.1_ox1.0.loc.31325	4.19371	49.5914	46.2149
asx1.1_ox1.0.loc.31328	1.71737	31.7585	66.5241
asx1.1_ox1.0.loc.15395	15.1341	19.6648	65.2011
asx1.1_ox1.0.loc.15394	29.4649	58.9565	11.5786
asx1.1_ox1.0.loc.04078	36.8089	31.647	31.5441
asx1.1_ox1.0.loc.15396	23.3585	44.4804	32.161
asx1.1_ox1.0.loc.15391	20.6362	47.2452	32.1186
asx1.1_ox1.0.loc.16958	23.0745	47.3477	29.5778
asx1.1_ox1.0.loc.15393	24.7924	56.6082	18.5993
asx1.1_ox1.0.loc.15392	46.0428	42.4643	11.4929
asx1.1_ox1.0.loc.04070	24.6148	64.781	10.6043
asx1.1_ox1.0.loc.04071	43.9797	40.9147	15.1056
asx1.1_ox1.0.loc.15399	39.3266	45.5077	15.1657
asx1.1_ox1.0.loc.15398	53.6241	18.1864	28.1896
asx1.1_ox1.0.loc.04074	11.2542	46.1664	42.5794
asx1.1_ox1.0.loc.14550	14.5563	8.21965	77.224
asx1.1_ox1.0.loc.08030	8.19988	31.4768	60.3233
asx1.1_ox1.0.loc.00793	54.1794	37.1557	8.66491
asx1.1_ox1.0.loc.00792	31.319	42.7519	25.9291
asx1.1_ox1.0.loc.00790	7.04377	30.6552	62.3011
asx1.1_ox1.0.loc.00797	14.6201	68.9462	16.4337
asx1.1_ox1.0.loc.00795	22.5778	28.7166	48.7057
asx1.1_ox1.0.loc.00794	8.9314	53.38	37.6886
asx1.1_ox1.0.loc.00798	31.1062	56.3112	12.5825
asx1.1_ox1.0.loc.18622	34.7381	49.9079	15.354
asx1.1_ox1.0.loc.18623	31.0341	51.4657	17.5002
asx1.1_ox1.0.loc.09168	32.8653	47.6123	19.5224
asx1.1_ox1.0.loc.18626	28.4787	65.2587	6.26255
asx1.1_ox1.0.loc.18625	16.0502	26.5456	57.4041
asx1.1_ox1.0.loc.09162	33.0685	40.9515	25.98
asx1.1_ox1.0.loc.09161	12.8452	50.6575	36.4973
asx1.1_ox1.0.loc.18629	40.4612	24.9397	34.5991
asx1.1_ox1.0.loc.09167	31.6263	64.2487	4.12494
asx1.1_ox1.0.loc.09166	30.8595	62.5772	6.56333
asx1.1_ox1.0.loc.09165	49.448	43.5946	6.95736
asx1.1_ox1.0.loc.09164	26.3793	50.4286	23.1921
asx1.1_ox1.0.loc.05679	7.11559	22.2834	70.601
asx1.1_ox1.0.loc.05678	28.2249	46.7748	25.0003
asx1.1_ox1.0.loc.05673	5.82119	35.9172	58.2616
asx1.1_ox1.0.loc.05672	28.732	44.5372	26.7309
asx1.1_ox1.0.loc.05670	2.50736	13.3914	84.1013
asx1.1_ox1.0.loc.05676	31.9397	44.296	23.7643
asx1.1_ox1.0.loc.05675	18.8731	34.9154	46.2115
asx1.1_ox1.0.loc.05674	27.7121	57.4564	14.8316
asx1.1_ox1.0.loc.35319	25.853	46.636	27.511
asx1.1_ox1.0.loc.35318	49.2009	47.1832	3.61585
asx1.1_ox1.0.loc.35317	31.9692	47.8622	20.1686
asx1.1_ox1.0.loc.35316	27.6341	42.1179	30.248
asx1.1_ox1.0.loc.35314	38.7318	52.6968	8.57143
asx1.1_ox1.0.loc.35313	27.6678	63.655	8.67723
asx1.1_ox1.0.loc.35312	2.33024	57.4289	40.2409
asx1.1_ox1.0.loc.35311	23.2103	48.2245	28.5652
asx1.1_ox1.0.loc.35310	30.6804	34.2438	35.0759
asx1.1_ox1.0.loc.22078	2.95919	29.5315	67.5093
asx1.1_ox1.0.loc.36958	42.6703	55.3486	1.98113
asx1.1_ox1.0.loc.16347	34.5233	55.4442	10.0325
asx1.1_ox1.0.loc.16346	41.2428	51.6373	7.11982
asx1.1_ox1.0.loc.36951	24.8584	38.1497	36.9919
asx1.1_ox1.0.loc.36954	44.6816	48.4592	6.85914
asx1.1_ox1.0.loc.22074	63.4854	23.5545	12.9601
asx1.1_ox1.0.loc.36956	27.7471	50.5211	21.7318
asx1.1_ox1.0.loc.36957	56.8309	38.9629	4.20615
asx1.1_ox1.0.loc.06329	26.8768	56.9437	16.1795
asx1.1_ox1.0.loc.22075	67.8252	23.8656	8.30918
asx1.1_ox1.0.loc.06321	23.087	34.2208	42.6922
asx1.1_ox1.0.loc.06322	4.05628	28.3187	67.625
asx1.1_ox1.0.loc.06323	64.7505	19.1136	16.1358
asx1.1_ox1.0.loc.06324	36.1935	47.4638	16.3427
asx1.1_ox1.0.loc.16342	16.1138	58.2357	25.6505
asx1.1_ox1.0.loc.16341	46.6869	33.7607	19.5525
asx1.1_ox1.0.loc.08292	13.3078	51.8485	34.8437
asx1.1_ox1.0.loc.08290	53.3215	43.7335	2.94503
asx1.1_ox1.0.loc.08296	13.1487	25.7977	61.0536
asx1.1_ox1.0.loc.08297	25.4941	35.2049	39.301
asx1.1_ox1.0.loc.08294	37.7786	50.4873	11.7341
asx1.1_ox1.0.loc.03243	33.775	49.1034	17.1216
asx1.1_ox1.0.loc.33419	28.0653	53.0273	18.9074
asx1.1_ox1.0.loc.33412	29.1889	35.1305	35.6806
asx1.1_ox1.0.loc.33413	26.1353	57.5934	16.2712
asx1.1_ox1.0.loc.33410	44.1387	37.5431	18.3182
asx1.1_ox1.0.loc.33411	35.4237	48.1393	16.437
asx1.1_ox1.0.loc.33416	13.983	29.073	56.944
asx1.1_ox1.0.loc.33415	22.1874	25.4078	52.4048
asx1.1_ox1.0.loc.28661	24.6184	48.6362	26.7454
asx1.1_ox1.0.loc.28660	33.3108	49.5973	17.0919
asx1.1_ox1.0.loc.28663	42.0245	39.5679	18.4076
asx1.1_ox1.0.loc.28665	22.5182	56.4937	20.9881
asx1.1_ox1.0.loc.28664	11.3937	78.1783	10.4281
asx1.1_ox1.0.loc.28667	30.9147	57.4061	11.6791
asx1.1_ox1.0.loc.03914	40.3316	48.7163	10.9521
asx1.1_ox1.0.loc.03915	7.13573	50.1267	42.7376
asx1.1_ox1.0.loc.03917	26.4768	47.6278	25.8954
asx1.1_ox1.0.loc.03910	6.46451	43.5336	50.0019
asx1.1_ox1.0.loc.03911	27.0963	42.8737	30.03
asx1.1_ox1.0.loc.03913	1.60673	29.7869	68.6064
asx1.1_ox1.0.loc.03918	23.7364	39.1369	37.1267
asx1.1_ox1.0.loc.29392	42.1119	52.4474	5.44077
asx1.1_ox1.0.loc.29393	15.633	29.8993	54.4678
asx1.1_ox1.0.loc.29390	7.34258	34.4236	58.2339
asx1.1_ox1.0.loc.29396	58.2494	20.8753	20.8753
asx1.1_ox1.0.loc.29397	1.41845	6.60484	91.9767
asx1.1_ox1.0.loc.29395	42.1292	39.4071	18.4637
asx1.1_ox1.0.loc.29399	29.0396	66.3334	4.62708
asx1.1_ox1.0.loc.38279	31.1951	23.3223	45.4826
asx1.1_ox1.0.loc.38278	34.3979	50.3876	15.2145
asx1.1_ox1.0.loc.38277	36.2635	49.4929	14.2437
asx1.1_ox1.0.loc.38276	34.7888	55.0608	10.1504
asx1.1_ox1.0.loc.38274	20.2531	48.7323	31.0146
asx1.1_ox1.0.loc.38273	21.7086	55.516	22.7754
asx1.1_ox1.0.loc.38272	18.9578	52.8823	28.1598
asx1.1_ox1.0.loc.38271	7.7082	32.3202	59.9716
asx1.1_ox1.0.loc.29536	85.6552	12.9502	1.39462
asx1.1_ox1.0.loc.29537	3.20817	12.4773	84.3146
asx1.1_ox1.0.loc.29534	63.7763	32.8411	3.38258
asx1.1_ox1.0.loc.29532	12.3206	48.9657	38.7138
asx1.1_ox1.0.loc.29533	6.13631	7.25086	86.6128
asx1.1_ox1.0.loc.29530	24.0684	50.0116	25.92
asx1.1_ox1.0.loc.29531	25.9026	44.2327	29.8647
asx1.1_ox1.0.loc.29538	76.1409	22.2896	1.56951
asx1.1_ox1.0.loc.29539	34.943	33.6488	31.4082
asx1.1_ox1.0.loc.24956	34.6914	57.7549	7.55375
asx1.1_ox1.0.loc.24955	30.4745	54.1075	15.418
asx1.1_ox1.0.loc.09989	45.466	41.8207	12.7134
asx1.1_ox1.0.loc.08782	18.6197	38.5394	42.841
asx1.1_ox1.0.loc.24951	26.7995	61.2256	11.9749
asx1.1_ox1.0.loc.24950	28.6297	61.2147	10.1556
asx1.1_ox1.0.loc.09985	6.62279	28.3262	65.051
asx1.1_ox1.0.loc.09984	55.901	39.5038	4.5952
asx1.1_ox1.0.loc.09987	7.74366	28.138	64.1183
asx1.1_ox1.0.loc.08783	41.2578	29.3711	29.3711
asx1.1_ox1.0.loc.09981	39.8295	44.9305	15.24
asx1.1_ox1.0.loc.09980	18.753	41.8537	39.3933
asx1.1_ox1.0.loc.24959	24.6185	58.5646	16.817
asx1.1_ox1.0.loc.24958	32.1977	61.4612	6.34108
asx1.1_ox1.0.loc.30444	17.3285	65.9909	16.6806
asx1.1_ox1.0.loc.30445	16.1499	39.3934	44.4567
asx1.1_ox1.0.loc.30448	6.8421	25.4588	67.6991
asx1.1_ox1.0.loc.30449	40.7957	35.483	23.7213
asx1.1_ox1.0.loc.36138	39.4707	57.7706	2.75875
asx1.1_ox1.0.loc.36139	33.3493	45.5396	21.111
asx1.1_ox1.0.loc.36132	6.32971	31.3296	62.3407
asx1.1_ox1.0.loc.36133	23.9963	49.5026	26.5011
asx1.1_ox1.0.loc.36131	6.31369	34.8415	58.8448
asx1.1_ox1.0.loc.36136	50.5472	34.617	14.8358
asx1.1_ox1.0.loc.06999	18.5571	77.4194	4.02352
asx1.1_ox1.0.loc.36134	3.57237	11.1916	85.236
asx1.1_ox1.0.loc.36135	22.0443	50.5918	27.3639
asx1.1_ox1.0.loc.24481	40.632	44.8462	14.5218
asx1.1_ox1.0.loc.23452	26.1818	60.6575	13.1607
asx1.1_ox1.0.loc.23451	9.39019	42.9045	47.7053
asx1.1_ox1.0.loc.24485	31.0935	52.8035	16.103
asx1.1_ox1.0.loc.23456	13.8811	50.9267	35.1922
asx1.1_ox1.0.loc.24487	16.6345	59.0655	24.3
asx1.1_ox1.0.loc.23454	25.975	39.22	34.805
asx1.1_ox1.0.loc.24489	21.6251	50.4624	27.9124
asx1.1_ox1.0.loc.24488	30.2971	51.5784	18.1245
asx1.1_ox1.0.loc.23459	15.3929	52.9189	31.6882
asx1.1_ox1.0.loc.23458	1.61781	9.62958	88.7526
asx1.1_ox1.0.loc.17421	42.605	42.9568	14.4382
asx1.1_ox1.0.loc.17420	23.4487	59.9354	16.6158
asx1.1_ox1.0.loc.17423	29.9282	35.3282	34.7436
asx1.1_ox1.0.loc.17422	4.89658	61.4182	33.6852
asx1.1_ox1.0.loc.17425	57.0436	40.3741	2.58229
asx1.1_ox1.0.loc.17424	57.7002	25.4643	16.8356
asx1.1_ox1.0.loc.17427	29.5624	54.4226	16.0149
asx1.1_ox1.0.loc.17426	4.53624	31.788	63.6758
asx1.1_ox1.0.loc.17429	31.4104	46.787	21.8026
asx1.1_ox1.0.loc.17428	27.7423	47.9822	24.2755
asx1.1_ox1.0.loc.22506	24.9498	23.7995	51.2508
asx1.1_ox1.0.loc.22507	41.5457	55.7183	2.73596
asx1.1_ox1.0.loc.22504	2.98575	30.4863	66.528
asx1.1_ox1.0.loc.22505	11.2553	81.41	7.33466
asx1.1_ox1.0.loc.22502	38.0238	45.729	16.2472
asx1.1_ox1.0.loc.22503	4.0661	31.0808	64.8531
asx1.1_ox1.0.loc.22501	27.4465	46.575	25.9785
asx1.1_ox1.0.loc.22508	6.537	41.7773	51.6857
asx1.1_ox1.0.loc.22509	5.29952	39.0568	55.6437
asx1.1_ox1.0.loc.33552	36.3143	40.2582	23.4275
asx1.1_ox1.0.loc.17399	39.4234	37.5612	23.0155
asx1.1_ox1.0.loc.17398	37.2866	55.4375	7.27583
asx1.1_ox1.0.loc.33557	46.2968	37.2238	16.4794
asx1.1_ox1.0.loc.17391	21.679	54.5276	23.7934
asx1.1_ox1.0.loc.17390	57.7722	34.9372	7.29063
asx1.1_ox1.0.loc.17397	49.006	36.0914	14.9026
asx1.1_ox1.0.loc.17396	24.3169	47.7211	27.962
asx1.1_ox1.0.loc.17395	9.54456	88.7222	1.73321
asx1.1_ox1.0.loc.17394	13.9458	34.4035	51.6507
asx1.1_ox1.0.loc.33555	55.3469	43.8504	0.802741
asx1.1_ox1.0.loc.07283	6.72664	37.2603	56.013
asx1.1_ox1.0.loc.27369	40.3832	51.8236	7.79314
asx1.1_ox1.0.loc.27367	28.877	46.9894	24.1335
asx1.1_ox1.0.loc.27366	32.8064	46.6224	20.5712
asx1.1_ox1.0.loc.27360	8.30063	47.1526	44.5467
asx1.1_ox1.0.loc.27362	27.5745	35.0236	37.4019
asx1.1_ox1.0.loc.07807	42.3589	12.0016	45.6394
asx1.1_ox1.0.loc.07802	25.8492	56.5289	17.6218
asx1.1_ox1.0.loc.07803	79.4045	20.036	0.559571
asx1.1_ox1.0.loc.07800	50.0449	35.4962	14.4589
asx1.1_ox1.0.loc.07801	32.8767	29.2423	37.881
asx1.1_ox1.0.loc.07808	13.0565	43.504	43.4395
asx1.1_ox1.0.loc.07809	15.5228	51.0215	33.4558
asx1.1_ox1.0.loc.05530	68.5527	25.8717	5.57565
asx1.1_ox1.0.loc.05531	39.6865	51.5459	8.76763
asx1.1_ox1.0.loc.05532	5.94269	60.3105	33.7469
asx1.1_ox1.0.loc.05533	6.31821	78.4418	15.24
asx1.1_ox1.0.loc.05534	5.40447	56.9458	37.6497
asx1.1_ox1.0.loc.05538	14.6333	36.2359	49.1307
asx1.1_ox1.0.loc.20835	33.875	39.6117	26.5132
asx1.1_ox1.0.loc.20837	36.305	31.8475	31.8475
asx1.1_ox1.0.loc.20830	18.8188	48.9716	32.2096
asx1.1_ox1.0.loc.24104	21.9819	36.4491	41.569
asx1.1_ox1.0.loc.24105	22.6098	30.7052	46.685
asx1.1_ox1.0.loc.24102	22.3345	49.2431	28.4224
asx1.1_ox1.0.loc.24103	26.1158	41.1358	32.7484
asx1.1_ox1.0.loc.13894	3.35544	37.8318	58.8127
asx1.1_ox1.0.loc.13895	0.53982	2.10906	97.3511
asx1.1_ox1.0.loc.13896	0.53982	2.10906	97.3511
asx1.1_ox1.0.loc.13897	2.63422	73.1132	24.2526
asx1.1_ox1.0.loc.13891	9.92767	23.7159	66.3564
asx1.1_ox1.0.loc.13892	10.7398	47.2976	41.9626
asx1.1_ox1.0.loc.09522	11.9647	17.9116	70.1237
asx1.1_ox1.0.loc.13898	38.2447	30.6297	31.1256
asx1.1_ox1.0.loc.13899	34.2594	46.3027	19.4379
asx1.1_ox1.0.loc.09527	1.19605	3.89706	94.9069
asx1.1_ox1.0.loc.34621	53.0354	44.0519	2.91276
asx1.1_ox1.0.loc.13500	38.9629	46.6622	14.3749
asx1.1_ox1.0.loc.25275	36.1757	29.961	33.8632
asx1.1_ox1.0.loc.12279	9.53055	78.3181	12.1514
asx1.1_ox1.0.loc.12278	29.4663	50.9166	19.6171
asx1.1_ox1.0.loc.25271	6.13047	30.9814	62.8882
asx1.1_ox1.0.loc.25270	5.95141	29.458	64.5906
asx1.1_ox1.0.loc.25273	2.43623	13.9111	83.6526
asx1.1_ox1.0.loc.25272	8.17295	39.9547	51.8724
asx1.1_ox1.0.loc.12273	17.6721	60.2672	22.0607
asx1.1_ox1.0.loc.12272	5.96293	30.3963	63.6408
asx1.1_ox1.0.loc.12271	6.50674	65.2734	28.2199
asx1.1_ox1.0.loc.12270	6.03651	31.0589	62.9046
asx1.1_ox1.0.loc.12277	43.1212	28.4394	28.4394
asx1.1_ox1.0.loc.12276	16.9128	42.7317	40.3554
asx1.1_ox1.0.loc.12275	35.7032	47.3197	16.9771
asx1.1_ox1.0.loc.31646	36.7508	46.4766	16.7726
asx1.1_ox1.0.loc.10659	4.13886	30.536	65.3251
asx1.1_ox1.0.loc.12859	24.2947	52.2578	23.4475
asx1.1_ox1.0.loc.12858	22.6969	25.1182	52.1849
asx1.1_ox1.0.loc.12857	18.7611	29.9318	51.3071
asx1.1_ox1.0.loc.12856	31.2783	55.6489	13.0728
asx1.1_ox1.0.loc.12855	41.1202	51.0895	7.79031
asx1.1_ox1.0.loc.12854	36.6137	50.452	12.9343
asx1.1_ox1.0.loc.12853	26.9847	52.1573	20.858
asx1.1_ox1.0.loc.12852	44.6943	47.7157	7.59002
asx1.1_ox1.0.loc.12851	12.8011	45.5253	41.6736
asx1.1_ox1.0.loc.00809	22.6678	34.9143	42.418
asx1.1_ox1.0.loc.00808	16.8341	53.4211	29.7448
asx1.1_ox1.0.loc.28787	3.23832	24.9004	71.8613
asx1.1_ox1.0.loc.00803	13.5984	42.1563	44.2454
asx1.1_ox1.0.loc.00802	33.3444	44.0835	22.5722
asx1.1_ox1.0.loc.00800	36.2094	43.6249	20.1657
asx1.1_ox1.0.loc.00807	64.0009	32.3575	3.64164
asx1.1_ox1.0.loc.00806	59.3428	32.5274	8.12978
asx1.1_ox1.0.loc.00805	15.9381	77.5011	6.5608
asx1.1_ox1.0.loc.00804	41.4941	41.4878	17.0181
asx1.1_ox1.0.loc.37073	60.6295	29.7816	9.58889
asx1.1_ox1.0.loc.28781	7.95549	3.5272	88.5173
asx1.1_ox1.0.loc.35159	24.0987	36.8036	39.0978
asx1.1_ox1.0.loc.35158	6.65811	39.4264	53.9155
asx1.1_ox1.0.loc.35155	17.2235	64.8899	17.8866
asx1.1_ox1.0.loc.35154	9.30803	73.8406	16.8514
asx1.1_ox1.0.loc.35151	60.5139	20.7825	18.7036
asx1.1_ox1.0.loc.35150	4.95354	36.3061	58.7403
asx1.1_ox1.0.loc.35152	20.1266	54.2364	25.637
asx1.1_ox1.0.loc.17986	71.7639	26.5598	1.67624
asx1.1_ox1.0.loc.17984	33.6531	51.0595	15.2874
asx1.1_ox1.0.loc.17985	68.1224	28.2359	3.64165
asx1.1_ox1.0.loc.17981	29.863	52.6481	17.4888
asx1.1_ox1.0.loc.17988	42.1619	41.5147	16.3234
asx1.1_ox1.0.loc.17989	69.7914	25.1349	5.07377
asx1.1_ox1.0.loc.35487	25.7093	36.4125	37.8781
asx1.1_ox1.0.loc.35486	8.76795	27.3434	63.8886
asx1.1_ox1.0.loc.35485	34.4542	46.7458	18.8
asx1.1_ox1.0.loc.35484	4.92548	38.5967	56.4779
asx1.1_ox1.0.loc.35483	4.50979	31.2371	64.2532
asx1.1_ox1.0.loc.35482	37.0393	28.0841	34.8767
asx1.1_ox1.0.loc.35480	60.9399	32.7888	6.27133
asx1.1_ox1.0.loc.35488	42.8076	28.5962	28.5962
asx1.1_ox1.0.loc.09919	48.726	46.0237	5.25026
asx1.1_ox1.0.loc.34688	14.1824	62.2803	23.5373
asx1.1_ox1.0.loc.34689	29.5651	61.3851	9.0498
asx1.1_ox1.0.loc.34683	25.1433	25.1433	49.7134
asx1.1_ox1.0.loc.34686	16.003	57.7335	26.2635
asx1.1_ox1.0.loc.34687	20.0615	40.7121	39.2263
asx1.1_ox1.0.loc.14987	8.96677	52.7832	38.2501
asx1.1_ox1.0.loc.34356	38.3247	33.8518	27.8235
asx1.1_ox1.0.loc.34357	7.99352	35.3108	56.6957
asx1.1_ox1.0.loc.14983	43.6247	42.9331	13.4422
asx1.1_ox1.0.loc.34351	40.7624	51.6599	7.5777
asx1.1_ox1.0.loc.14981	23.9639	37.3532	38.6829
asx1.1_ox1.0.loc.14980	26.1886	39.892	33.9194
asx1.1_ox1.0.loc.34358	45.2302	46.4196	8.3502
asx1.1_ox1.0.loc.34359	36.256	47.3754	16.3686
asx1.1_ox1.0.loc.14988	51.5014	42.1144	6.38421
asx1.1_ox1.0.loc.02513	2.26798	16.884	80.848
asx1.1_ox1.0.loc.02511	49.9685	41.6789	8.35257
asx1.1_ox1.0.loc.02510	22.8297	41.3149	35.8554
asx1.1_ox1.0.loc.02517	0.543269	11.6502	87.8065
asx1.1_ox1.0.loc.02515	0.795735	38.2655	60.9388
asx1.1_ox1.0.loc.02514	21.5555	49.9319	28.5127
asx1.1_ox1.0.loc.02519	5.99051	43.5362	50.4733
asx1.1_ox1.0.loc.02518	1.21551	31.6777	67.1068
asx1.1_ox1.0.loc.38479	35.7104	50.3353	13.9543
asx1.1_ox1.0.loc.38478	25.2817	54.6758	20.0425
asx1.1_ox1.0.loc.38475	23.3018	35.8384	40.8598
asx1.1_ox1.0.loc.38474	2.48323	1.31369	96.2031
asx1.1_ox1.0.loc.38477	53.6893	41.2254	5.0853
asx1.1_ox1.0.loc.38473	12.1395	16.9825	70.8781
asx1.1_ox1.0.loc.16167	12.5167	18.3353	69.148
asx1.1_ox1.0.loc.16166	32.9648	44.608	22.4272
asx1.1_ox1.0.loc.16165	45.0603	18.5146	36.4251
asx1.1_ox1.0.loc.16164	36.1553	47.1351	16.7095
asx1.1_ox1.0.loc.16163	9.77268	62.9902	27.2371
asx1.1_ox1.0.loc.16162	13.0043	73.4096	13.586
asx1.1_ox1.0.loc.16161	7.82667	23.1416	69.0318
asx1.1_ox1.0.loc.16169	41.2983	30.835	27.8667
asx1.1_ox1.0.loc.04919	11.688	36.2233	52.0887
asx1.1_ox1.0.loc.04918	9.40279	38.3924	52.2048
asx1.1_ox1.0.loc.04916	7.11856	33.9595	58.9219
asx1.1_ox1.0.loc.04911	51.9167	41.1541	6.92919
asx1.1_ox1.0.loc.04913	30.2937	52.4846	17.2216
asx1.1_ox1.0.loc.13663	34.0927	62.2536	3.6537
asx1.1_ox1.0.loc.16290	2.92533	0.703696	96.371
asx1.1_ox1.0.loc.16293	17.4027	24.9306	57.6667
asx1.1_ox1.0.loc.16292	67.9105	28.7796	3.3099
asx1.1_ox1.0.loc.16295	22.4273	66.3732	11.1995
asx1.1_ox1.0.loc.13666	34.9814	49.4077	15.6109
asx1.1_ox1.0.loc.13665	40.7283	51.4769	7.79479
asx1.1_ox1.0.loc.16296	18.32	29.9709	51.7091
asx1.1_ox1.0.loc.16299	18.4513	10.9639	70.5849
asx1.1_ox1.0.loc.13669	36.6004	33.819	29.5806
asx1.1_ox1.0.loc.23611	29.7133	49.2805	21.0062
asx1.1_ox1.0.loc.23610	33.2346	37.283	29.4824
asx1.1_ox1.0.loc.12132	1.50201	54.4499	44.048
asx1.1_ox1.0.loc.12133	32.2945	52.9375	14.768
asx1.1_ox1.0.loc.18198	49.3607	45.012	5.62731
asx1.1_ox1.0.loc.23614	23.8872	47.8764	28.2365
asx1.1_ox1.0.loc.23617	2.18837	20.2559	77.5557
asx1.1_ox1.0.loc.23616	2.20746	9.01227	88.7803
asx1.1_ox1.0.loc.18194	29.4313	25.1962	45.3724
asx1.1_ox1.0.loc.23618	18.0816	36	45.9184
asx1.1_ox1.0.loc.18196	42.8121	30.9873	26.2006
asx1.1_ox1.0.loc.18197	39.2544	38.9197	21.826
asx1.1_ox1.0.loc.18191	48.877	45.0072	6.11582
asx1.1_ox1.0.loc.18193	39.5018	47.5751	12.9231
asx1.1_ox1.0.loc.03643	53.6817	36.5478	9.77045
asx1.1_ox1.0.loc.03644	31.1166	55.6784	13.205
asx1.1_ox1.0.loc.03645	2.88458	6.98371	90.1317
asx1.1_ox1.0.loc.03646	11.3053	48.7836	39.9112
asx1.1_ox1.0.loc.03647	20.9875	31.4158	47.5967
asx1.1_ox1.0.loc.03648	3.42638	94.9735	1.60011
asx1.1_ox1.0.loc.03649	27.9547	45.6894	26.3559
asx1.1_ox1.0.loc.32352	4.59226	17.0049	78.4028
asx1.1_ox1.0.loc.32353	21.7148	58.8302	19.455
asx1.1_ox1.0.loc.32350	41.1401	40.5963	18.2636
asx1.1_ox1.0.loc.32356	8.20506	31.7316	60.0633
asx1.1_ox1.0.loc.32354	0.49963	14.7749	84.7254
asx1.1_ox1.0.loc.32358	60.8664	22.5708	16.5628
asx1.1_ox1.0.loc.32359	15.548	20.5422	63.9098
asx1.1_ox1.0.loc.36442	40.8851	51.5719	7.54301
asx1.1_ox1.0.loc.36443	46.908	38.698	14.394
asx1.1_ox1.0.loc.36440	32.4568	39.7598	27.7835
asx1.1_ox1.0.loc.36441	31.0998	58.2141	10.686
asx1.1_ox1.0.loc.36444	18.6136	36.3199	45.0666
asx1.1_ox1.0.loc.36445	81.6989	17.4255	0.875574
asx1.1_ox1.0.loc.16836	8.57129	54.9189	36.5098
asx1.1_ox1.0.loc.16831	10.753	66.519	22.7281
asx1.1_ox1.0.loc.16830	22.4592	58.2238	19.317
asx1.1_ox1.0.loc.16833	20.3761	25.7668	53.8571
asx1.1_ox1.0.loc.16832	25.2145	57.8107	16.9748
asx1.1_ox1.0.loc.16838	8.43511	61.7576	29.8072
asx1.1_ox1.0.loc.08110	9.33942	15.3403	75.3203
asx1.1_ox1.0.loc.08113	18.3503	72.9713	8.6784
asx1.1_ox1.0.loc.08112	29.7257	46.8617	23.4126
asx1.1_ox1.0.loc.08115	6.10273	26.2763	67.621
asx1.1_ox1.0.loc.14479	4.40276	73.3042	22.293
asx1.1_ox1.0.loc.08116	20.4611	30.9818	48.5571
asx1.1_ox1.0.loc.14477	27.0836	56.3597	16.5567
asx1.1_ox1.0.loc.08118	50.9577	42.9484	6.09395
asx1.1_ox1.0.loc.14474	7.74216	57.243	35.0149
asx1.1_ox1.0.loc.14473	25.7687	45.5415	28.6897
asx1.1_ox1.0.loc.35165	47.1326	42.5638	10.3036
asx1.1_ox1.0.loc.00348	12.4767	72.2314	15.2919
asx1.1_ox1.0.loc.00349	8.39993	82.354	9.24606
asx1.1_ox1.0.loc.00344	50.0838	30.1101	19.8061
asx1.1_ox1.0.loc.00345	5.23114	82.4573	12.3116
asx1.1_ox1.0.loc.00342	41.9695	49.3139	8.71654
asx1.1_ox1.0.loc.00343	65.8519	32.3399	1.80821
asx1.1_ox1.0.loc.19742	24.4946	19.4579	56.0475
asx1.1_ox1.0.loc.19743	45.6871	42.3146	11.9982
asx1.1_ox1.0.loc.19740	14.9299	48.109	36.9611
asx1.1_ox1.0.loc.19741	10.6407	31.5055	57.8538
asx1.1_ox1.0.loc.19747	30.5967	41.8297	27.5736
asx1.1_ox1.0.loc.19744	25.7777	46.7067	27.5156
asx1.1_ox1.0.loc.19745	35.1387	41.0396	23.8217
asx1.1_ox1.0.loc.19748	57.7347	38.4039	3.86139
asx1.1_ox1.0.loc.19749	37.961	60.6081	1.43084
asx1.1_ox1.0.loc.30846	18.7254	38.9335	42.3411
asx1.1_ox1.0.loc.30840	1.98139	67.795	30.2236
asx1.1_ox1.0.loc.30841	6.33276	49.9802	43.6871
asx1.1_ox1.0.loc.30842	14.5962	76.9964	8.4074
asx1.1_ox1.0.loc.30843	39.5568	47.7724	12.6708
asx1.1_ox1.0.loc.05738	26.3926	53.2294	20.378
asx1.1_ox1.0.loc.05739	24.9918	44.645	30.3633
asx1.1_ox1.0.loc.05736	51.5334	34.7919	13.6747
asx1.1_ox1.0.loc.05737	8.2117	49.8169	41.9714
asx1.1_ox1.0.loc.05732	30.1295	39.3962	30.4743
asx1.1_ox1.0.loc.05733	17.7884	44.8885	37.3232
asx1.1_ox1.0.loc.06429	39.907	50.6842	9.40884
asx1.1_ox1.0.loc.01439	4.80302	61.0203	34.1767
asx1.1_ox1.0.loc.01438	19.5799	43.7911	36.6289
asx1.1_ox1.0.loc.01435	23.0879	36.4157	40.4964
asx1.1_ox1.0.loc.01434	56.2449	38.1727	5.58242
asx1.1_ox1.0.loc.01437	8.83954	25.6333	65.5271
asx1.1_ox1.0.loc.01436	21.2149	33.2603	45.5247
asx1.1_ox1.0.loc.01431	13.8873	65.8256	20.2871
asx1.1_ox1.0.loc.01433	44.0113	43.976	12.0127
asx1.1_ox1.0.loc.01432	39.7313	56.9442	3.32447
asx1.1_ox1.0.loc.09648	20.3736	48.4615	31.165
asx1.1_ox1.0.loc.09646	21.2933	51.9062	26.8005
asx1.1_ox1.0.loc.09647	44.8353	47.8973	7.26744
asx1.1_ox1.0.loc.09644	4.2142	32.8104	62.9754
asx1.1_ox1.0.loc.09645	40.2918	48.7433	10.9649
asx1.1_ox1.0.loc.09642	15.7235	56.6822	27.5944
asx1.1_ox1.0.loc.09640	20.0529	68.9437	11.0034
asx1.1_ox1.0.loc.09641	20.6895	66.7877	12.5229
asx1.1_ox1.0.loc.05888	18.9311	46.6977	34.3711
asx1.1_ox1.0.loc.05889	23.8247	50.0446	26.1307
asx1.1_ox1.0.loc.05880	38.8794	50.3121	10.8086
asx1.1_ox1.0.loc.05883	14.6881	54.7233	30.5886
asx1.1_ox1.0.loc.05885	26.5293	62.0975	11.3732
asx1.1_ox1.0.loc.05887	38.6755	49.2916	12.0329
asx1.1_ox1.0.loc.07770	50.5284	39.3797	10.0919
asx1.1_ox1.0.loc.07771	31.2929	27.5972	41.1099
asx1.1_ox1.0.loc.07772	48.8932	38.6804	12.4264
asx1.1_ox1.0.loc.07773	11.0313	37.4975	51.4712
asx1.1_ox1.0.loc.07774	6.72043	26.4471	66.8325
asx1.1_ox1.0.loc.07777	23.8494	56.1489	20.0017
asx1.1_ox1.0.loc.09398	38.1197	40.9053	20.975
asx1.1_ox1.0.loc.09399	7.34996	37.4676	55.1824
asx1.1_ox1.0.loc.09391	72.0856	27.0088	0.905648
asx1.1_ox1.0.loc.09392	34.6897	44.5381	20.7722
asx1.1_ox1.0.loc.09393	37.7976	59.7631	2.43936
asx1.1_ox1.0.loc.09395	17.1727	42.7548	40.0725
asx1.1_ox1.0.loc.09396	3.53464	19.2035	77.2618
asx1.1_ox1.0.loc.09397	82.0446	16.545	1.41041
asx1.1_ox1.0.loc.37382	14.619	83.4742	1.90678
asx1.1_ox1.0.loc.38575	31.6863	45.2867	23.027
asx1.1_ox1.0.loc.37380	23.0453	14.2004	62.7543
asx1.1_ox1.0.loc.38570	54.7577	38.0279	7.21437
asx1.1_ox1.0.loc.38573	60.3161	26.0447	13.6392
asx1.1_ox1.0.loc.06289	31.6065	49.3551	19.0384
asx1.1_ox1.0.loc.06286	5.7353	30.1161	64.1486
asx1.1_ox1.0.loc.06285	22.5336	51.0919	26.3745
asx1.1_ox1.0.loc.06283	10.5135	61.2983	28.1882
asx1.1_ox1.0.loc.06282	24.061	56.0277	19.9113
asx1.1_ox1.0.loc.06280	37.95	52.3717	9.67825
asx1.1_ox1.0.loc.07483	16.6516	77.4244	5.92398
asx1.1_ox1.0.loc.07480	0.591455	3.35328	96.0553
asx1.1_ox1.0.loc.07481	18.8811	37.4948	43.624
asx1.1_ox1.0.loc.07486	12.9184	71.3003	15.7812
asx1.1_ox1.0.loc.07487	24.3993	53.8102	21.7905
asx1.1_ox1.0.loc.07484	6.2119	23.2961	70.492
asx1.1_ox1.0.loc.07485	1.97938	16.962	81.0587
asx1.1_ox1.0.loc.07488	24.0048	71.8232	4.17199
asx1.1_ox1.0.loc.07489	28.9825	53.771	17.2465
asx1.1_ox1.0.loc.08932	15.4442	21.3261	63.2297
asx1.1_ox1.0.loc.08931	52.2676	35.1048	12.6276
asx1.1_ox1.0.loc.08930	48.7043	43.511	7.78466
asx1.1_ox1.0.loc.08937	16.4245	21.6345	61.941
asx1.1_ox1.0.loc.08936	12.9225	23.944	63.1334
asx1.1_ox1.0.loc.08938	9.11831	37.3054	53.5762
asx1.1_ox1.0.loc.27088	16.5402	61.4545	22.0052
asx1.1_ox1.0.loc.22209	19.5809	3.53598	76.8831
asx1.1_ox1.0.loc.37182	33.9755	49.8103	16.2142
asx1.1_ox1.0.loc.37183	40.6475	50.86	8.4925
asx1.1_ox1.0.loc.37184	26.2467	57.132	16.6213
asx1.1_ox1.0.loc.37185	12.6463	53.6732	33.6805
asx1.1_ox1.0.loc.37186	32.0829	46.6763	21.2408
asx1.1_ox1.0.loc.37188	35.2969	50.9958	13.7073
asx1.1_ox1.0.loc.37189	26.4711	58.9492	14.5797
asx1.1_ox1.0.loc.22203	2.68432	40.4451	56.8706
asx1.1_ox1.0.loc.22205	25.3774	27.2189	47.4037
asx1.1_ox1.0.loc.31920	33.3481	65.144	1.50794
asx1.1_ox1.0.loc.31923	19.4714	33.1186	47.41
asx1.1_ox1.0.loc.31924	6.52667	34.697	58.7763
asx1.1_ox1.0.loc.31925	28.6188	46.6448	24.7364
asx1.1_ox1.0.loc.31926	28.89	36.5689	34.541
asx1.1_ox1.0.loc.31927	3.4404	28.3321	68.2275
asx1.1_ox1.0.loc.31928	9.54486	22.8798	67.5753
asx1.1_ox1.0.loc.31929	37.333	53.0228	9.64416
asx1.1_ox1.0.loc.00124	15.835	32.9582	51.2068
asx1.1_ox1.0.loc.37458	24.5357	50.6496	24.8147
asx1.1_ox1.0.loc.37459	22.0287	46.8193	31.152
asx1.1_ox1.0.loc.37453	50.5637	41.2079	8.22833
asx1.1_ox1.0.loc.37451	39.3746	47.2357	13.3897
asx1.1_ox1.0.loc.19692	35.9721	37.7222	26.3057
asx1.1_ox1.0.loc.37454	17.4036	31.1349	51.4615
asx1.1_ox1.0.loc.37455	17.287	60.2514	22.4616
asx1.1_ox1.0.loc.00127	25.54	35.333	39.127
asx1.1_ox1.0.loc.00120	3.96477	43.1745	52.8607
asx1.1_ox1.0.loc.19697	33.061	55.8725	11.0665
asx1.1_ox1.0.loc.19698	10.7959	3.77718	85.427
asx1.1_ox1.0.loc.23556	31.2448	31.75	37.0052
asx1.1_ox1.0.loc.23557	43.6265	41.5262	14.8474
asx1.1_ox1.0.loc.23555	12.6918	32.4253	54.8828
asx1.1_ox1.0.loc.23552	24.2556	51.1443	24.6001
asx1.1_ox1.0.loc.23550	52.1974	28.8287	18.9739
asx1.1_ox1.0.loc.23551	51.7529	18.2682	29.9789
asx1.1_ox1.0.loc.23558	13.0607	43.2624	43.6769
asx1.1_ox1.0.loc.08734	27.9715	47.8144	24.2141
asx1.1_ox1.0.loc.10741	37.5455	53.2609	9.19364
asx1.1_ox1.0.loc.10740	33.1186	48.8275	18.0539
asx1.1_ox1.0.loc.10743	8.52101	37.8653	53.6137
asx1.1_ox1.0.loc.10742	35.9545	33.418	30.6275
asx1.1_ox1.0.loc.10747	35.9264	48.8019	15.2717
asx1.1_ox1.0.loc.10748	41.2176	50.6524	8.13002
asx1.1_ox1.0.loc.08814	48.0991	47.5874	4.31347
asx1.1_ox1.0.loc.03847	66.8148	24.3731	8.81209
asx1.1_ox1.0.loc.03845	72.173	17.696	10.131
asx1.1_ox1.0.loc.08810	10.4014	44.3774	45.2212
asx1.1_ox1.0.loc.17218	37.5008	30.7812	31.718
asx1.1_ox1.0.loc.17216	10.3247	46.3671	43.3082
asx1.1_ox1.0.loc.17217	10.2967	51.365	38.3382
asx1.1_ox1.0.loc.17214	48.6764	34.668	16.6556
asx1.1_ox1.0.loc.17215	38.5846	28.8265	32.5889
asx1.1_ox1.0.loc.17212	20.1726	27.8007	52.0267
asx1.1_ox1.0.loc.17213	60.0158	18.4269	21.5573
asx1.1_ox1.0.loc.17210	28.1418	51.9662	19.892
asx1.1_ox1.0.loc.17211	32.9248	40.8667	26.2085
asx1.1_ox1.0.loc.19430	35.4507	32.6933	31.856
asx1.1_ox1.0.loc.22774	25.9313	52.3277	21.741
asx1.1_ox1.0.loc.25895	22.5899	37.2556	40.1545
asx1.1_ox1.0.loc.25894	4.84632	25.4043	69.7494
asx1.1_ox1.0.loc.25897	10.2336	34.9382	54.8281
asx1.1_ox1.0.loc.22776	23.6541	37.755	38.5908
asx1.1_ox1.0.loc.25891	18.0041	78.7385	3.25747
asx1.1_ox1.0.loc.25893	40.6748	49.5007	9.82453
asx1.1_ox1.0.loc.25892	19.3438	74.5241	6.13211
asx1.1_ox1.0.loc.22771	23.251	55.8803	20.8687
asx1.1_ox1.0.loc.25899	0.519209	11.0835	88.3973
asx1.1_ox1.0.loc.25898	26.4352	43.3056	30.2592
asx1.1_ox1.0.loc.19435	47.4639	31.4444	21.0918
asx1.1_ox1.0.loc.22773	24.4507	41.7463	33.8031
asx1.1_ox1.0.loc.06903	21.2098	46.2422	32.548
asx1.1_ox1.0.loc.20116	5.60391	25.1467	69.2494
asx1.1_ox1.0.loc.20115	45.0314	49.9901	4.97854
asx1.1_ox1.0.loc.20114	41.5727	54.9643	3.46296
asx1.1_ox1.0.loc.20113	24.7214	38.5266	36.752
asx1.1_ox1.0.loc.20112	33.5871	46.2736	20.1393
asx1.1_ox1.0.loc.20111	31.9138	41.0139	27.0723
asx1.1_ox1.0.loc.01654	20.7652	38.0806	41.1542
asx1.1_ox1.0.loc.06601	32.0818	52.4181	15.5001
asx1.1_ox1.0.loc.20119	47.1744	32.8478	19.9778
asx1.1_ox1.0.loc.20118	25.7595	48.0096	26.2309
asx1.1_ox1.0.loc.06607	27.6885	64.4706	7.8409
asx1.1_ox1.0.loc.06605	42.8725	46.1809	10.9466
asx1.1_ox1.0.loc.27664	6.26017	15.8511	77.8887
asx1.1_ox1.0.loc.27665	22.9031	52.6113	24.4856
asx1.1_ox1.0.loc.27666	71.6458	23.9355	4.41878
asx1.1_ox1.0.loc.27660	25.6266	45.649	28.7244
asx1.1_ox1.0.loc.27662	56.9847	39.2217	3.79361
asx1.1_ox1.0.loc.27663	9.45135	24.0045	66.5442
asx1.1_ox1.0.loc.27668	41.6163	48.2285	10.1552
asx1.1_ox1.0.loc.27669	27.4169	49.0813	23.5018
asx1.1_ox1.0.loc.19968	10.1924	19.0101	70.7975
asx1.1_ox1.0.loc.21798	53.2466	31.0846	15.6688
asx1.1_ox1.0.loc.21799	24.5447	36.7693	38.686
asx1.1_ox1.0.loc.21796	4.46734	16.5951	78.9376
asx1.1_ox1.0.loc.21797	32.1751	40.8727	26.9521
asx1.1_ox1.0.loc.21792	2.48212	12.1039	85.414
asx1.1_ox1.0.loc.21793	26.3667	45.0099	28.6234
asx1.1_ox1.0.loc.21790	35.073	56.1874	8.73958
asx1.1_ox1.0.loc.21791	72.6781	9.2973	18.0246
asx1.1_ox1.0.loc.13460	36.6873	53.886	9.42671
asx1.1_ox1.0.loc.13463	1.65478	70.8285	27.5167
asx1.1_ox1.0.loc.13462	28.408	57.8099	13.7821
asx1.1_ox1.0.loc.13464	8.64897	52.3242	39.0269
asx1.1_ox1.0.loc.13467	40.135	31.0478	28.8171
asx1.1_ox1.0.loc.13466	39.8362	47.1863	12.9775
asx1.1_ox1.0.loc.13469	31.1056	47.561	21.3334
asx1.1_ox1.0.loc.13468	29.096	43.6761	27.228
asx1.1_ox1.0.loc.15108	6.4077	65.2988	28.2935
asx1.1_ox1.0.loc.15109	4.34711	14.5855	81.0674
asx1.1_ox1.0.loc.12338	33.837	52.3216	13.8414
asx1.1_ox1.0.loc.12339	6.33498	50.1761	43.489
asx1.1_ox1.0.loc.12336	2.74549	30.7128	66.5418
asx1.1_ox1.0.loc.12334	53.7569	42.7624	3.48069
asx1.1_ox1.0.loc.12335	17.6098	32.0696	50.3207
asx1.1_ox1.0.loc.15100	29.02	61.3929	9.58703
asx1.1_ox1.0.loc.12333	25.0333	61.4517	13.515
asx1.1_ox1.0.loc.12330	47.5197	43.8706	8.60967
asx1.1_ox1.0.loc.12331	57.8877	21.0561	21.0561
asx1.1_ox1.0.loc.24317	22.6583	58.8594	18.4823
asx1.1_ox1.0.loc.24316	32.7604	44.9946	22.2449
asx1.1_ox1.0.loc.24311	16.342	15.0458	68.6123
asx1.1_ox1.0.loc.24310	32.4319	66.6329	0.935151
asx1.1_ox1.0.loc.24319	30.791	49.9343	19.2747
asx1.1_ox1.0.loc.24318	30.8925	38.9414	30.166
asx1.1_ox1.0.loc.11829	29.6602	51.3875	18.9523
asx1.1_ox1.0.loc.11828	11.5711	50.963	37.4658
asx1.1_ox1.0.loc.11823	49.5575	28.2573	22.1852
asx1.1_ox1.0.loc.11822	29.8854	54.4458	15.6687
asx1.1_ox1.0.loc.11820	9.8234	40.98	49.1966
asx1.1_ox1.0.loc.11827	1.31463	9.41369	89.2717
asx1.1_ox1.0.loc.11825	40.5003	49.6523	9.84741
asx1.1_ox1.0.loc.11824	59.731	36.2789	3.99005
asx1.1_ox1.0.loc.26229	0.141868	0.242092	99.616
asx1.1_ox1.0.loc.26228	30.7568	41.399	27.8442
asx1.1_ox1.0.loc.26226	30.9837	49.6948	19.3215
asx1.1_ox1.0.loc.26225	30.9837	49.6948	19.3215
asx1.1_ox1.0.loc.26223	3.17419	32.629	64.1968
asx1.1_ox1.0.loc.26222	8.53181	23.7153	67.7529
asx1.1_ox1.0.loc.26221	26.4995	49.7581	23.7424
asx1.1_ox1.0.loc.26220	13.8412	40.816	45.3428
asx1.1_ox1.0.loc.34343	11.4629	39.8198	48.7173
asx1.1_ox1.0.loc.14279	29.0406	53.4248	17.5346
asx1.1_ox1.0.loc.14278	29.9505	42.5389	27.5106
asx1.1_ox1.0.loc.34342	22.9272	54.8437	22.2291
asx1.1_ox1.0.loc.14275	38.9245	45.3264	15.7491
asx1.1_ox1.0.loc.14277	17.7216	60.4856	21.7928
asx1.1_ox1.0.loc.14276	17.7216	60.4856	21.7928
asx1.1_ox1.0.loc.14271	25.4947	13.2181	61.2872
asx1.1_ox1.0.loc.14270	66.4896	32.0868	1.42356
asx1.1_ox1.0.loc.14273	5.6998	15.1352	79.165
asx1.1_ox1.0.loc.02297	20	40	40
asx1.1_ox1.0.loc.34347	20.4329	37.9118	41.6553
asx1.1_ox1.0.loc.34345	33.7564	31.5848	34.6587
asx1.1_ox1.0.loc.11179	6.59448	62.8382	30.5673
asx1.1_ox1.0.loc.11178	6.0849	6.40972	87.5054
asx1.1_ox1.0.loc.11171	46.9234	30.8935	22.1831
asx1.1_ox1.0.loc.11173	16.0135	72.9863	11.0002
asx1.1_ox1.0.loc.11175	0.537568	3.41634	96.0461
asx1.1_ox1.0.loc.11174	13.511	35.7068	50.7822
asx1.1_ox1.0.loc.11177	1.60575	5.19399	93.2003
asx1.1_ox1.0.loc.31820	5.61927	18.554	75.8267
asx1.1_ox1.0.loc.10882	26.993	43.7699	29.2371
asx1.1_ox1.0.loc.10883	26.9843	39.6736	33.3421
asx1.1_ox1.0.loc.10881	23.1471	50.1063	26.7466
asx1.1_ox1.0.loc.10886	28.4316	60.8627	10.7057
asx1.1_ox1.0.loc.10887	29.1623	58.3458	12.492
asx1.1_ox1.0.loc.10885	49.9687	43.5302	6.50107
asx1.1_ox1.0.loc.10888	8.17776	74.8437	16.9785
asx1.1_ox1.0.loc.10889	48.6769	42.827	8.49612
asx1.1_ox1.0.loc.29248	31.0964	26.3537	42.55
asx1.1_ox1.0.loc.31562	37.7818	45.83	16.3881
asx1.1_ox1.0.loc.29249	33.472	54.5649	11.9631
asx1.1_ox1.0.loc.31563	1.2847	6.29909	92.4162
asx1.1_ox1.0.loc.31565	2.29866	43.6519	54.0494
asx1.1_ox1.0.loc.10226	30.4218	53.139	16.4392
asx1.1_ox1.0.loc.10227	34.36	41.6706	23.9693
asx1.1_ox1.0.loc.10224	18.1668	49.4857	32.3475
asx1.1_ox1.0.loc.10225	45.109	26.8991	27.9919
asx1.1_ox1.0.loc.10223	47.0569	36.2387	16.7044
asx1.1_ox1.0.loc.10221	39.2112	49.1739	11.6149
asx1.1_ox1.0.loc.10228	4.1716	19.8395	75.9889
asx1.1_ox1.0.loc.10229	17.102	32.1507	50.7473
asx1.1_ox1.0.loc.14993	42.3678	29.0071	28.6251
asx1.1_ox1.0.loc.21817	2.79856	27.2688	69.9327
asx1.1_ox1.0.loc.37378	8.41452	64.8836	26.7019
asx1.1_ox1.0.loc.21819	3.61375	18.5796	77.8067
asx1.1_ox1.0.loc.35728	12.1484	53.0015	34.85
asx1.1_ox1.0.loc.37376	27.8301	25.3404	46.8294
asx1.1_ox1.0.loc.35727	27.084	45.0981	27.818
asx1.1_ox1.0.loc.32973	4.93145	27.2185	67.85
asx1.1_ox1.0.loc.32970	6.3302	37.9275	55.7423
asx1.1_ox1.0.loc.32971	43.7298	46.4641	9.80605
asx1.1_ox1.0.loc.32976	9.01939	14.379	76.6016
asx1.1_ox1.0.loc.32978	36.9756	44.3417	18.6827
asx1.1_ox1.0.loc.32979	32.575	61.3654	6.05957
asx1.1_ox1.0.loc.30239	31.1458	48.4913	20.363
asx1.1_ox1.0.loc.30238	27.5156	51.0408	21.4436
asx1.1_ox1.0.loc.30232	20.1469	47.39	32.4631
asx1.1_ox1.0.loc.30231	14.3003	31.8965	53.8033
asx1.1_ox1.0.loc.30230	6.53144	26.5818	66.8868
asx1.1_ox1.0.loc.30237	27.2475	61.8207	10.9318
asx1.1_ox1.0.loc.30236	29.0341	31.9054	39.0604
asx1.1_ox1.0.loc.30234	20.2026	38.4736	41.3238
asx1.1_ox1.0.loc.13146	42.2648	47.2849	10.4503
asx1.1_ox1.0.loc.16315	36.0445	51.3947	12.5608
asx1.1_ox1.0.loc.13144	45.3888	46.9856	7.62559
asx1.1_ox1.0.loc.19161	0.826251	41.8264	57.3474
asx1.1_ox1.0.loc.13142	47.3423	46.5183	6.13941
asx1.1_ox1.0.loc.13143	38.824	47.8072	13.3688
asx1.1_ox1.0.loc.19164	12.1426	21.7502	66.1072
asx1.1_ox1.0.loc.16313	38.0091	52.055	9.93592
asx1.1_ox1.0.loc.19168	1.25887	29.1609	69.5803
asx1.1_ox1.0.loc.19169	28.7659	16.1057	55.1285
asx1.1_ox1.0.loc.16318	7.87192	18.6157	73.5124
asx1.1_ox1.0.loc.16319	45.5873	47.3741	7.03862
asx1.1_ox1.0.loc.22049	22.7457	31.1153	46.139
asx1.1_ox1.0.loc.13149	16.1479	34.2265	49.6256
asx1.1_ox1.0.loc.29741	53.9622	43.9924	2.04539
asx1.1_ox1.0.loc.29740	39.6939	49.2912	11.0149
asx1.1_ox1.0.loc.29743	25.0018	50.8364	24.1618
asx1.1_ox1.0.loc.29745	31.5401	66.0899	2.37002
asx1.1_ox1.0.loc.29744	43.9681	52.5233	3.5086
asx1.1_ox1.0.loc.29747	25.0232	56.3868	18.59
asx1.1_ox1.0.loc.29746	29.3789	52.3604	18.2607
asx1.1_ox1.0.loc.29748	26.9144	51.4828	21.6028
asx1.1_ox1.0.loc.02496	47.828	48.0902	4.08185
asx1.1_ox1.0.loc.02497	33.7919	52.653	13.5551
asx1.1_ox1.0.loc.02494	2.68427	20.9929	76.3229
asx1.1_ox1.0.loc.02493	30.8046	42.8123	26.3831
asx1.1_ox1.0.loc.02490	35.703	25.281	39.016
asx1.1_ox1.0.loc.02491	28.0212	34.0948	37.884
asx1.1_ox1.0.loc.02498	18.3443	45.6897	35.966
asx1.1_ox1.0.loc.02499	11.9885	76.1005	11.9111
asx1.1_ox1.0.loc.04890	35.9339	15.9649	48.1012
asx1.1_ox1.0.loc.37619	22.6257	47.4767	29.8976
asx1.1_ox1.0.loc.04892	32.9324	60.7619	6.30565
asx1.1_ox1.0.loc.04893	9.09966	69.375	21.5253
asx1.1_ox1.0.loc.04894	47.4457	39.7512	12.8031
asx1.1_ox1.0.loc.04895	48.7132	46.0624	5.2244
asx1.1_ox1.0.loc.04896	42.0228	41.2658	16.7113
asx1.1_ox1.0.loc.09869	20.0964	31.6649	48.2387
asx1.1_ox1.0.loc.37610	27.6523	51.115	21.2327
asx1.1_ox1.0.loc.09867	38.7381	43.1864	18.0756
asx1.1_ox1.0.loc.09864	37.2528	54.8834	7.86379
asx1.1_ox1.0.loc.37613	45.282	35.8507	18.8674
asx1.1_ox1.0.loc.09862	4.68305	28.681	66.6359
asx1.1_ox1.0.loc.09863	2.88309	31.556	65.561
asx1.1_ox1.0.loc.09860	16.8549	43.3709	39.7742
asx1.1_ox1.0.loc.09861	63.1173	33.6081	3.27459
asx1.1_ox1.0.loc.02720	59.8875	38.7245	1.38798
asx1.1_ox1.0.loc.02722	0.897582	5.47063	93.6318
asx1.1_ox1.0.loc.02723	2.48716	33.5186	63.9943
asx1.1_ox1.0.loc.02727	18.4402	28.4278	53.132
asx1.1_ox1.0.loc.33760	7.34194	36.7096	55.9485
asx1.1_ox1.0.loc.02729	36.0003	41.4635	22.5362
asx1.1_ox1.0.loc.33762	4.16883	40.7629	55.0683
asx1.1_ox1.0.loc.33763	31.8668	15.6471	52.4861
asx1.1_ox1.0.loc.33764	34.061	44.8735	21.0655
asx1.1_ox1.0.loc.33766	81.5969	4.1358	14.2673
asx1.1_ox1.0.loc.33767	90.3336	4.17455	5.49182
asx1.1_ox1.0.loc.15665	29.8159	67.215	2.96913
asx1.1_ox1.0.loc.15664	15.4302	32.8127	51.757
asx1.1_ox1.0.loc.15667	29.3284	61.1159	9.55566
asx1.1_ox1.0.loc.15666	42.9938	38.7325	18.2737
asx1.1_ox1.0.loc.15661	25.6426	53.8105	20.5469
asx1.1_ox1.0.loc.15660	34.9566	52.1814	12.862
asx1.1_ox1.0.loc.15663	20.9395	38.3271	40.7333
asx1.1_ox1.0.loc.04762	64.454	28.019	7.52704
asx1.1_ox1.0.loc.04761	26.6663	50.8004	22.5332
asx1.1_ox1.0.loc.15669	42.7288	46.4252	10.846
asx1.1_ox1.0.loc.23799	32.9988	42.4843	24.5169
asx1.1_ox1.0.loc.18789	3.13205	70.5444	26.3236
asx1.1_ox1.0.loc.18785	27.9508	42.6814	29.3678
asx1.1_ox1.0.loc.18786	8.7632	36.1643	55.0725
asx1.1_ox1.0.loc.18780	24.9294	44.2644	30.8063
asx1.1_ox1.0.loc.31612	19.2337	66.9587	13.8076
asx1.1_ox1.0.loc.31613	20.1106	71.1249	8.76452
asx1.1_ox1.0.loc.31610	39.9494	49.661	10.3897
asx1.1_ox1.0.loc.31611	7.56282	52.503	39.9342
asx1.1_ox1.0.loc.31616	7.70783	25.5561	66.7361
asx1.1_ox1.0.loc.31617	25.5191	67.0392	7.44174
asx1.1_ox1.0.loc.31614	3.49047	11.8113	84.6983
asx1.1_ox1.0.loc.31615	2.85955	9.87746	87.263
asx1.1_ox1.0.loc.32491	20.5545	47.808	31.6375
asx1.1_ox1.0.loc.32490	46.7254	31.0522	22.2224
asx1.1_ox1.0.loc.31618	29.6954	51.1307	19.1739
asx1.1_ox1.0.loc.32492	20.6266	51.1769	28.1965
asx1.1_ox1.0.loc.32494	15.0379	38.9744	45.9877
asx1.1_ox1.0.loc.32497	7.36364	29.665	62.9714
asx1.1_ox1.0.loc.32496	25.0214	49.8346	25.144
asx1.1_ox1.0.loc.10003	30.4581	56.1753	13.3667
asx1.1_ox1.0.loc.08094	39.143	26.0435	34.8134
asx1.1_ox1.0.loc.08095	25.5217	42.3724	32.1059
asx1.1_ox1.0.loc.08096	8.72461	36.9001	54.3753
asx1.1_ox1.0.loc.08097	9.47012	42.3115	48.2184
asx1.1_ox1.0.loc.08090	5.72262	2.78628	91.4911
asx1.1_ox1.0.loc.32146	46.6467	38.6756	14.6777
asx1.1_ox1.0.loc.08092	72.6467	18.6665	8.68681
asx1.1_ox1.0.loc.32144	47.4996	46.5334	5.96694
asx1.1_ox1.0.loc.19628	42.4451	50.6556	6.89929
asx1.1_ox1.0.loc.32149	33.9727	54.0373	11.9899
asx1.1_ox1.0.loc.32148	1.88636	24.1438	73.9698
asx1.1_ox1.0.loc.08098	44.8148	53.3198	1.86537
asx1.1_ox1.0.loc.08099	18.2972	77.1698	4.53303
asx1.1_ox1.0.loc.28829	28.3236	61.2885	10.3879
asx1.1_ox1.0.loc.28828	2.9255	89.0192	8.05528
asx1.1_ox1.0.loc.28823	22.7371	51.1536	26.1092
asx1.1_ox1.0.loc.28820	41.1965	52.4118	6.39165
asx1.1_ox1.0.loc.28827	34.4256	35.6139	29.9605
asx1.1_ox1.0.loc.28826	35.6117	51.6965	12.6917
asx1.1_ox1.0.loc.28825	14.5128	49.7093	35.7779
asx1.1_ox1.0.loc.28824	32.1968	20.0621	47.7411
asx1.1_ox1.0.loc.05389	43.7045	35.8783	20.4173
asx1.1_ox1.0.loc.05388	66.0575	30.6997	3.24277
asx1.1_ox1.0.loc.05383	48.0574	44.447	7.49557
asx1.1_ox1.0.loc.05382	38.5482	56.5262	4.92557
asx1.1_ox1.0.loc.05381	14.6847	35.258	50.0572
asx1.1_ox1.0.loc.05380	11.0938	45.318	43.5882
asx1.1_ox1.0.loc.05387	18.8318	32.639	48.5291
asx1.1_ox1.0.loc.05386	1.37321	39.6455	58.9813
asx1.1_ox1.0.loc.05385	34.8029	42.2165	22.9806
asx1.1_ox1.0.loc.01608	4.93625	5.30515	89.7586
asx1.1_ox1.0.loc.01609	10.3649	40.773	48.8621
asx1.1_ox1.0.loc.01602	43.2424	20.0766	36.681
asx1.1_ox1.0.loc.01600	28.5009	55.8784	15.6207
asx1.1_ox1.0.loc.01601	10.6673	52.2748	37.0578
asx1.1_ox1.0.loc.01606	10.9859	84.3653	4.64878
asx1.1_ox1.0.loc.01607	41.778	51.0283	7.19366
asx1.1_ox1.0.loc.01604	26.6271	43.9312	29.4417
asx1.1_ox1.0.loc.01605	52.9496	25.8285	21.2219
asx1.1_ox1.0.loc.19953	21.2348	54.6068	24.1584
asx1.1_ox1.0.loc.19952	3.29045	70.8105	25.8991
asx1.1_ox1.0.loc.19950	35.4927	51.9927	12.5146
asx1.1_ox1.0.loc.19957	29.1165	53.4476	17.4359
asx1.1_ox1.0.loc.19956	47.0649	40.3551	12.58
asx1.1_ox1.0.loc.19955	22.0052	32.4786	45.5162
asx1.1_ox1.0.loc.19954	30.3066	53.4848	16.2087
asx1.1_ox1.0.loc.19958	15.3808	66.7186	17.9006
asx1.1_ox1.0.loc.25428	20.7257	45.9791	33.2952
asx1.1_ox1.0.loc.25429	31.6801	66.3286	1.99124
asx1.1_ox1.0.loc.25425	48.8734	45.1583	5.96829
asx1.1_ox1.0.loc.25427	46.9895	26.9773	26.0333
asx1.1_ox1.0.loc.25422	17.8398	79.9751	2.1851
asx1.1_ox1.0.loc.25423	21.9896	38.8604	39.15
asx1.1_ox1.0.loc.21558	26.9252	51.5714	21.5034
asx1.1_ox1.0.loc.21555	27.1558	31.0529	41.7913
asx1.1_ox1.0.loc.21557	81.0883	17.542	1.36973
asx1.1_ox1.0.loc.21551	40.0088	46.077	13.9142
asx1.1_ox1.0.loc.21552	39.5596	37.8239	22.6165
asx1.1_ox1.0.loc.21553	24.3766	30.5312	45.0922
asx1.1_ox1.0.loc.09059	8.13387	43.2526	48.6135
asx1.1_ox1.0.loc.09058	16.0622	54.8048	29.1329
asx1.1_ox1.0.loc.09057	34.4701	63.8774	1.65249
asx1.1_ox1.0.loc.09055	30.732	49.9744	19.2937
asx1.1_ox1.0.loc.09054	1.04122	10.5067	88.4521
asx1.1_ox1.0.loc.09052	9.52203	16.1838	74.2942
asx1.1_ox1.0.loc.09050	41.1405	48.3084	10.551
asx1.1_ox1.0.loc.05969	32.9227	49.2304	17.8469
asx1.1_ox1.0.loc.05967	11.2009	29.7434	59.0557
asx1.1_ox1.0.loc.05964	26.0379	52.046	21.9161
asx1.1_ox1.0.loc.05961	39.7365	55.5389	4.72458
asx1.1_ox1.0.loc.05960	45.1926	43.0724	11.735
asx1.1_ox1.0.loc.29880	10.7279	52.1087	37.1634
asx1.1_ox1.0.loc.29881	24.9428	50.2815	24.7757
asx1.1_ox1.0.loc.29886	12.7943	38.3416	48.8641
asx1.1_ox1.0.loc.29887	32.009	57.7506	10.2404
asx1.1_ox1.0.loc.29884	3.32283	35.448	61.2292
asx1.1_ox1.0.loc.29885	2.9601	25.3084	71.7315
asx1.1_ox1.0.loc.07520	20.5221	56.8951	22.5828
asx1.1_ox1.0.loc.07523	21.4365	49.7762	28.7873
asx1.1_ox1.0.loc.07522	51.6922	43.7267	4.58103
asx1.1_ox1.0.loc.07525	10.6246	60.5357	28.8398
asx1.1_ox1.0.loc.07524	2.86654	13.4221	83.7113
asx1.1_ox1.0.loc.07527	5.90624	35.9694	58.1243
asx1.1_ox1.0.loc.07526	15.2378	42.2264	42.5358
asx1.1_ox1.0.loc.28178	30.7666	56.2632	12.9701
asx1.1_ox1.0.loc.28171	17.2091	33.4774	49.3135
asx1.1_ox1.0.loc.28170	32.6707	55.6418	11.6875
asx1.1_ox1.0.loc.28173	34.0268	51.6883	14.2849
asx1.1_ox1.0.loc.28172	25.8465	45.9042	28.2493
asx1.1_ox1.0.loc.28175	13.9374	41.905	44.1577
asx1.1_ox1.0.loc.28176	8.97668	44.7909	46.2324
asx1.1_ox1.0.loc.26029	6.39714	22.6128	70.9901
asx1.1_ox1.0.loc.26028	17.3596	46.6318	36.0086
asx1.1_ox1.0.loc.26024	10.8614	24.5713	64.5674
asx1.1_ox1.0.loc.26027	11.8372	36.8372	51.3256
asx1.1_ox1.0.loc.26026	50.0608	47.1901	2.74908
asx1.1_ox1.0.loc.26021	13.6834	38.8741	47.4425
asx1.1_ox1.0.loc.08876	3.42753	12.3628	84.2097
asx1.1_ox1.0.loc.08875	21.6694	59.6978	18.6328
asx1.1_ox1.0.loc.08873	11.6345	45.6489	42.7166
asx1.1_ox1.0.loc.08871	19.4583	30.0137	50.5281
asx1.1_ox1.0.loc.38487	43.0299	49.2851	7.68497
asx1.1_ox1.0.loc.08878	53.047	45.1026	1.85033
asx1.1_ox1.0.loc.08879	28.7666	51.1559	20.0775
asx1.1_ox1.0.loc.29226	43.5905	36.8991	19.5104
asx1.1_ox1.0.loc.29227	52.5161	40.4399	7.04401
asx1.1_ox1.0.loc.29224	13.3485	44.0219	42.6295
asx1.1_ox1.0.loc.29225	32.0428	48.6386	19.3186
asx1.1_ox1.0.loc.29222	11.6537	54.4567	33.8896
asx1.1_ox1.0.loc.29223	19.1826	20.0683	60.7491
asx1.1_ox1.0.loc.29221	11.7746	40.0902	48.1352
asx1.1_ox1.0.loc.29228	52.0706	40.7066	7.22283
asx1.1_ox1.0.loc.29229	83.793	14.8117	1.39531
asx1.1_ox1.0.loc.11376	24.9985	39.6367	35.3648
asx1.1_ox1.0.loc.11375	27.7034	37.3163	34.9804
asx1.1_ox1.0.loc.11374	9.05751	49.8599	41.0826
asx1.1_ox1.0.loc.11373	0.639051	3.3007	96.0603
asx1.1_ox1.0.loc.11372	18.0873	54.2074	27.7052
asx1.1_ox1.0.loc.11371	22.7208	16.1427	61.1366
asx1.1_ox1.0.loc.11378	34.2136	47.0073	18.7791
asx1.1_ox1.0.loc.27045	40.7061	31.8979	27.396
asx1.1_ox1.0.loc.27046	14.2484	33.3509	52.4008
asx1.1_ox1.0.loc.27047	2.28718	40.6639	57.0489
asx1.1_ox1.0.loc.27040	5.32918	92.195	2.47583
asx1.1_ox1.0.loc.27041	51.7665	39.0958	9.13762
asx1.1_ox1.0.loc.27048	44.3465	50.1157	5.53775
asx1.1_ox1.0.loc.27049	1.23936	35.3941	63.3665
asx1.1_ox1.0.loc.23963	34.6307	43.8786	21.4907
asx1.1_ox1.0.loc.23960	22.2695	65.209	12.5215
asx1.1_ox1.0.loc.23966	35.85	26.3197	37.8303
asx1.1_ox1.0.loc.23965	23.276	24.5642	52.1597
asx1.1_ox1.0.loc.23964	24.0628	30.2785	45.6587
asx1.1_ox1.0.loc.23968	45.5045	46.7257	7.76981
asx1.1_ox1.0.loc.12127	29.5035	46.5761	23.9204
asx1.1_ox1.0.loc.12126	30.1057	56.4539	13.4404
asx1.1_ox1.0.loc.18180	50.114	45.8936	3.99242
asx1.1_ox1.0.loc.18187	23.8437	63.1437	13.0126
asx1.1_ox1.0.loc.12122	3.25099	79.4074	17.3416
asx1.1_ox1.0.loc.18185	42.7466	28.2683	28.985
asx1.1_ox1.0.loc.12120	5.04992	27.9768	66.9732
asx1.1_ox1.0.loc.29159	1.28457	51.7505	46.9649
asx1.1_ox1.0.loc.24535	74.9529	18.6531	6.39405
asx1.1_ox1.0.loc.24534	35.4113	53.1589	11.4298
asx1.1_ox1.0.loc.24537	52.5128	38.5679	8.91934
asx1.1_ox1.0.loc.24536	20.1114	60.9792	18.9094
asx1.1_ox1.0.loc.24531	16.5844	44.2888	39.1268
asx1.1_ox1.0.loc.24530	17.4684	43.3673	39.1643
asx1.1_ox1.0.loc.24533	32.239	57.8248	9.93615
asx1.1_ox1.0.loc.24532	19.5673	33.8382	46.5945
asx1.1_ox1.0.loc.24539	10.8251	61.0973	28.0777
asx1.1_ox1.0.loc.20098	4.61423	39.0006	56.3852
asx1.1_ox1.0.loc.20092	0.920914	18.6175	80.4616
asx1.1_ox1.0.loc.20093	22.4354	57.4347	20.13
asx1.1_ox1.0.loc.20090	16.3574	40.1141	43.5284
asx1.1_ox1.0.loc.20091	4.55003	16.6856	78.7644
asx1.1_ox1.0.loc.20096	14.5033	20.5043	64.9923
asx1.1_ox1.0.loc.20097	6.16742	50.7978	43.0348
asx1.1_ox1.0.loc.20094	16.6886	28.2417	55.0697
asx1.1_ox1.0.loc.20095	40.7419	52.5385	6.71953
asx1.1_ox1.0.loc.01087	22.1847	31.9416	45.8737
asx1.1_ox1.0.loc.26878	7.91863	22.7707	69.3107
asx1.1_ox1.0.loc.26872	43.2752	41.4522	15.2726
asx1.1_ox1.0.loc.26870	55.5495	35.5802	8.87026
asx1.1_ox1.0.loc.26871	26.1932	53.3307	20.4761
asx1.1_ox1.0.loc.26876	47.1841	42.538	10.2778
asx1.1_ox1.0.loc.26877	38.4299	54.2364	7.33375
asx1.1_ox1.0.loc.26875	11.149	47.0976	41.7534
asx1.1_ox1.0.loc.32838	59.3569	37.4778	3.16532
asx1.1_ox1.0.loc.20324	60.2725	23.0581	16.6694
asx1.1_ox1.0.loc.20325	22.7038	45.404	31.8922
asx1.1_ox1.0.loc.20326	18.201	42.0491	39.7499
asx1.1_ox1.0.loc.20320	4.51711	28.2043	67.2786
asx1.1_ox1.0.loc.20322	44.7521	42.6792	12.5687
asx1.1_ox1.0.loc.20323	76.9631	22.4368	0.600052
asx1.1_ox1.0.loc.20329	8.04768	22.136	69.8163
asx1.1_ox1.0.loc.17009	5.32784	68.3592	26.313
asx1.1_ox1.0.loc.17008	19.6246	46.8375	33.5379
asx1.1_ox1.0.loc.17006	2.04491	14.2739	83.6812
asx1.1_ox1.0.loc.17005	10.2229	67.1459	22.6312
asx1.1_ox1.0.loc.17004	32.3715	41.8744	25.7542
asx1.1_ox1.0.loc.17003	36.6	46.6264	16.7736
asx1.1_ox1.0.loc.17002	30.4685	53.1047	16.4268
asx1.1_ox1.0.loc.17001	26.083	38.811	35.106
asx1.1_ox1.0.loc.17000	28.855	41.7716	29.3734
asx1.1_ox1.0.loc.13784	30.0955	37.0526	32.8519
asx1.1_ox1.0.loc.13785	48.1466	46.7432	5.11019
asx1.1_ox1.0.loc.13786	5.02116	82.3507	12.6281
asx1.1_ox1.0.loc.03038	73.4275	18.5939	7.97854
asx1.1_ox1.0.loc.13780	4.44007	85.9052	9.65475
asx1.1_ox1.0.loc.13781	25.1784	57.9855	16.8361
asx1.1_ox1.0.loc.13782	44.3742	46.7313	8.89454
asx1.1_ox1.0.loc.13783	40.0956	35.9279	23.9765
asx1.1_ox1.0.loc.03032	12.4238	32.7515	54.8247
asx1.1_ox1.0.loc.03031	57.0276	26.6862	16.2862
asx1.1_ox1.0.loc.03036	30.6278	50.7672	18.605
asx1.1_ox1.0.loc.03035	8.13862	45.0566	46.8048
asx1.1_ox1.0.loc.03034	4.38749	14.3203	81.2922
asx1.1_ox1.0.loc.21055	40.5678	45.1989	14.2333
asx1.1_ox1.0.loc.21054	22.7488	41.4931	35.7581
asx1.1_ox1.0.loc.21057	33.8296	49.9184	16.2521
asx1.1_ox1.0.loc.21056	26.1997	56.5705	17.2298
asx1.1_ox1.0.loc.21051	23.2562	59.6913	17.0525
asx1.1_ox1.0.loc.21053	17.7046	55.0297	27.2657
asx1.1_ox1.0.loc.21058	14.1464	25.2961	60.5575
asx1.1_ox1.0.loc.16667	49.4499	25.617	24.9331
asx1.1_ox1.0.loc.16661	26.1986	58.1046	15.6968
asx1.1_ox1.0.loc.12783	10.9316	76.4203	12.6481
asx1.1_ox1.0.loc.12782	26.3091	44.954	28.7369
asx1.1_ox1.0.loc.04569	47.6732	47.9531	4.37367
asx1.1_ox1.0.loc.04560	53.7187	27.3927	18.8886
asx1.1_ox1.0.loc.04561	33.2076	51.3522	15.4402
asx1.1_ox1.0.loc.04562	18.6098	42.191	39.1992
asx1.1_ox1.0.loc.04563	65.4441	32.5436	2.01231
asx1.1_ox1.0.loc.04564	28.6322	37.9434	33.4244
asx1.1_ox1.0.loc.04565	51.2432	23.4487	25.3082
asx1.1_ox1.0.loc.04566	5.02664	86.666	8.30735
asx1.1_ox1.0.loc.04567	21.6145	33.42	44.9654
asx1.1_ox1.0.loc.15318	25.5182	53.7121	20.7697
asx1.1_ox1.0.loc.15315	38.1617	42.8396	18.9987
asx1.1_ox1.0.loc.15316	38.8451	40.6638	20.491
asx1.1_ox1.0.loc.15311	42.2958	46.9567	10.7475
asx1.1_ox1.0.loc.15310	30.4925	54.1429	15.3646
asx1.1_ox1.0.loc.15313	30.6187	44.1866	25.1948
asx1.1_ox1.0.loc.15312	46.9016	29.4086	23.6898
asx1.1_ox1.0.loc.10928	42.6172	44.6066	12.7761
asx1.1_ox1.0.loc.10923	19.185	50.5321	30.2828
asx1.1_ox1.0.loc.10922	18.842	45.976	35.1819
asx1.1_ox1.0.loc.10925	62.7905	19.5985	17.611
asx1.1_ox1.0.loc.10924	72.5106	26.7117	0.77768
asx1.1_ox1.0.loc.10926	12.3004	8.22354	79.476
asx1.1_ox1.0.loc.16802	21.4949	36.9144	41.5907
asx1.1_ox1.0.loc.00719	52.6091	28.9572	18.4338
asx1.1_ox1.0.loc.00718	1.1657	36.0021	62.8322
asx1.1_ox1.0.loc.00713	2.14958	66.585	31.2654
asx1.1_ox1.0.loc.00712	8.50191	25.782	65.7161
asx1.1_ox1.0.loc.00711	25.2651	59.8159	14.9189
asx1.1_ox1.0.loc.00710	52.1173	41.2407	6.64201
asx1.1_ox1.0.loc.00717	35.5641	34.5285	29.9074
asx1.1_ox1.0.loc.00716	32.6344	52.4572	14.9084
asx1.1_ox1.0.loc.19581	15.057	54.4792	30.4638
asx1.1_ox1.0.loc.29855	37.2374	52.1558	10.6067
asx1.1_ox1.0.loc.01048	37.1505	40.4869	22.3626
asx1.1_ox1.0.loc.01049	2.51984	97.2222	0.257956
asx1.1_ox1.0.loc.01040	12.6819	41.0873	46.2309
asx1.1_ox1.0.loc.01041	35.1496	52.5503	12.3
asx1.1_ox1.0.loc.01042	30.7716	50.5116	18.7168
asx1.1_ox1.0.loc.01043	50.9526	24.5237	24.5237
asx1.1_ox1.0.loc.01044	64.6469	27.761	7.59214
asx1.1_ox1.0.loc.08124	28.3185	60.8351	10.8464
asx1.1_ox1.0.loc.08125	51.7641	39.4707	8.76512
asx1.1_ox1.0.loc.33948	26.0078	38.0638	35.9284
asx1.1_ox1.0.loc.33940	52.2033	42.7218	5.07495
asx1.1_ox1.0.loc.33941	88.0465	11.5246	0.428874
asx1.1_ox1.0.loc.33942	35.6675	24.5684	39.764
asx1.1_ox1.0.loc.33943	10.6538	36.7807	52.5656
asx1.1_ox1.0.loc.33944	31.142	9.82157	59.0365
asx1.1_ox1.0.loc.33945	82.3859	16.1872	1.42682
asx1.1_ox1.0.loc.14407	13.4709	37.9665	48.5626
asx1.1_ox1.0.loc.35397	39.7657	54.388	5.84634
asx1.1_ox1.0.loc.35396	16.2194	42.5629	41.2177
asx1.1_ox1.0.loc.35395	60.1655	34.8286	5.0059
asx1.1_ox1.0.loc.35394	22.0321	42.8138	35.1542
asx1.1_ox1.0.loc.35392	30.4148	39.8782	29.7071
asx1.1_ox1.0.loc.35391	9.03308	85.9719	4.99502
asx1.1_ox1.0.loc.35390	3.50044	62.9154	33.5842
asx1.1_ox1.0.loc.22168	20.6467	61.4229	17.9304
asx1.1_ox1.0.loc.34444	2.22994	24.0041	73.766
asx1.1_ox1.0.loc.34445	10.5559	22.9913	66.4527
asx1.1_ox1.0.loc.33490	29.1539	48.0789	22.7672
asx1.1_ox1.0.loc.34440	5.40178	63.2364	31.3618
asx1.1_ox1.0.loc.34441	10.6364	40.8258	48.5378
asx1.1_ox1.0.loc.33494	16.1056	60.9687	22.9257
asx1.1_ox1.0.loc.33495	4.19572	73.8136	21.9907
asx1.1_ox1.0.loc.33499	35.2177	32.3912	32.3912
asx1.1_ox1.0.loc.34448	16.6981	75.5041	7.79775
asx1.1_ox1.0.loc.34449	16.1106	74.5302	9.35926
asx1.1_ox1.0.loc.18848	8.95164	20.9362	70.1122
asx1.1_ox1.0.loc.18849	40.2143	56.539	3.24663
asx1.1_ox1.0.loc.18846	19.5707	40.3342	40.0951
asx1.1_ox1.0.loc.18844	18.9248	60.6288	20.4464
asx1.1_ox1.0.loc.18845	48.525	39.5893	11.8857
asx1.1_ox1.0.loc.18842	30.5157	45.3389	24.1454
asx1.1_ox1.0.loc.18843	30.8025	39.2551	29.9424
asx1.1_ox1.0.loc.22160	60.9066	28.0617	11.0317
asx1.1_ox1.0.loc.16210	25.0496	59.5725	15.3779
asx1.1_ox1.0.loc.22163	9.84772	53.6073	36.545
asx1.1_ox1.0.loc.22164	30.7552	52.0881	17.1567
asx1.1_ox1.0.loc.22165	28.151	63.8559	7.99311
asx1.1_ox1.0.loc.07053	35.6045	51.888	12.5075
asx1.1_ox1.0.loc.02020	46.0129	49.1893	4.79781
asx1.1_ox1.0.loc.02027	47.3977	49.0181	3.58416
asx1.1_ox1.0.loc.07054	16.3008	10.7351	72.9641
asx1.1_ox1.0.loc.02024	26.9929	53.1489	19.8582
asx1.1_ox1.0.loc.07058	14.4522	50.8036	34.7443
asx1.1_ox1.0.loc.02029	22.0959	38.6043	39.2998
asx1.1_ox1.0.loc.02028	50.0583	31.4291	18.5126
asx1.1_ox1.0.loc.28377	27.9651	44.741	27.294
asx1.1_ox1.0.loc.28376	27.0488	42.0931	30.8581
asx1.1_ox1.0.loc.28375	10.3358	35.1791	54.4852
asx1.1_ox1.0.loc.28374	28.7328	51.1501	20.1171
asx1.1_ox1.0.loc.28373	19.6928	37.0074	43.2998
asx1.1_ox1.0.loc.28372	33.217	27.4259	39.3571
asx1.1_ox1.0.loc.28371	51.8438	30.3066	17.8496
asx1.1_ox1.0.loc.03998	5.87325	57.4035	36.7232
asx1.1_ox1.0.loc.03999	2.01865	51.7724	46.209
asx1.1_ox1.0.loc.03995	35.5016	56.7255	7.7729
asx1.1_ox1.0.loc.03997	3.05295	35.0143	61.9328
asx1.1_ox1.0.loc.03992	43.0221	52.2802	4.69769
asx1.1_ox1.0.loc.03993	29.8665	37.8338	32.2998
asx1.1_ox1.0.loc.32723	41.9213	42.6497	15.429
asx1.1_ox1.0.loc.32722	35.8858	36.7591	27.3551
asx1.1_ox1.0.loc.32721	25.2701	62.9405	11.7894
asx1.1_ox1.0.loc.32724	4.96197	77.0992	17.9388
asx1.1_ox1.0.loc.32729	4.65262	2.32631	93.0211
[truncated: 25,207 more rows]
